# Supplementary material for: The transcriptional landscape of the giant freshwater prawn: Embryonic development and early sexual differentiation mechanisms
Source: Front Endocrinol (Lausanne). 2022 Dec 7;13:1059936. doi: 10.3389/fendo.2022.1059936 (PMC9767951; doi:10.3389/fendo.2022.1059936)
Supplement: Supplementary file 15 [file Table_7.xlsx]

## Sheet: Sheet1
Table S7 - Differentially spliced genes during embryonic development
*The extreme value across comparisons of subsequent days sampled
LeafCutter cluster ID	Spliced junction	ΔPSI (max)*	FDR (min)*	PSI D1	PSI D3	PSI D5	PSI D11	PSI D17	M. rosenbergii gene	Orthologs
clu_1435_NA	scaffold11649:346555-353859	0.303584	2.9e-79	0.552854	0.578214	0.556206	0.447697	0.216719	g13106,g13107	ankyrin-2-like
clu_1435_NA	scaffold11649:346555-360133	0.223322	2.9e-79	0.00568856	0.00364845	0.0024471	0.0782758	0.226008	g13106,g13107	ankyrin-2-like
clu_1431_NA	scaffold8982:1521037-1542766	0.272028	1.09e-47	0.462743	0.296523	0.312665	0.187428	0.230589	g2830
clu_1436_NA	scaffold11649:393726-458423	0.565534	2.16e-46	0.988767	0.980479	0.990729	0.83206	0.548543	g13107	ankyrin-2-like
clu_9080_NA	scaffold5691:1287802-1296629	0.338849	9.79e-41	0	0	0	0.582056	0.920905	g19322
clu_2232_NA	scaffold2399-4:180215-194681	0.284823	4.25e-38	0.294053	0.0229779	0.0390525	0.0118718	0.0149938	g8178,g8179
clu_2232_NA	scaffold2399-4:180215-185727	0.274233	4.25e-38	0.113051	0.381594	0.366095	0.377594	0.385789	g8178,g8179
clu_2232_NA	scaffold2399-4:194905-201522	0.242742	4.25e-38	0.402119	0.221469	0.250483	0.19799	0.159429	g8178,g8179
clu_10776_NA	scaffold278-5:337510-338972	0.310517	7.47e-37	0.496985	0.186542	0.194048	0.274004	0.260111	g25747
clu_10776_NA	scaffold278-5:335459-338230	0.301117	7.47e-37	0.0211589	0.322685	0.319603	0.244708	0.248072	g25747
clu_10776_NA	scaffold278-5:338342-338972	0.286988	7.47e-37	0.0129616	0.299252	0.300023	0.216734	0.234004	g25747
clu_10776_NA	scaffold278-5:335459-337398	0.285971	7.47e-37	0.471821	0.184014	0.184035	0.264751	0.25581	g25747
clu_9473_NA	scaffold273992:4166-12930	0.257477	4.46e-35	0	0.264678	0.314995	0.0937928	0.0544186	g47746
clu_9473_NA	scaffold273992:3577-3960	0.205327	4.46e-35	0	0.293012	0.152718	0.110778	0.083645	g47746
clu_167_NA	scaffold1202-31:770562-787368	0.431734	4.93e-34	0.842283	0.581222	0.654629	0.495378	0.437617	g42257
clu_167_NA	scaffold1202-31:764694-770304	0.228568	4.93e-34	0.0319976	0.250735	0.195255	0.149518	0.125496	g42257
clu_1442_NA	scaffold11649:614212-646826	0.66615	2.82e-33	0.737156	0.438251	0.169993	0.147003	0.0806346	g13109	ankyrin 2, isoform AA
clu_1442_NA	scaffold11649:635563-646826	0.356794	2.82e-33	0.0342561	0.0876321	0.130684	0.114065	0.380715	g13109	ankyrin 2, isoform AA
clu_1442_NA	scaffold11649:614212-614791	0.279175	2.82e-33	0.000350345	0.00027289	0.116139	0.279181	0.182781	g13109	ankyrin 2, isoform AA
clu_1442_NA	scaffold11649:614212-632875	0.276221	2.82e-33	0.125052	0.316917	0.317771	0.18823	0.139502	g13109	ankyrin 2, isoform AA
clu_1442_NA	scaffold11649:614212-635117	0.250629	2.82e-33	0.000390147	0.0286484	0.00696627	0.0256261	0.257712	g13109	ankyrin 2, isoform AA
clu_1442_NA	scaffold11649:632943-646826	0.241842	2.82e-33	0.196852	0.27273	0.354251	0.154462	0.118715	g13109	ankyrin 2, isoform AA
clu_1442_NA	scaffold11649:614808-646826	0.2335	2.82e-33	0.00345266	0.115141	0.144204	0.233931	0.1637	g13109	ankyrin 2, isoform AA
clu_1880_NA	scaffold242844:9383-14147	0.627364	1.66e-31	0	0.742803	0.634243	0.258012	0.115519
clu_1880_NA	scaffold242844:12179-14147	0.292185	1.66e-31	0	0.0983806	0.139517	0.277533	0.390592
clu_1880_NA	scaffold242844:9383-12105	0.23851	1.66e-31	0	0.0813352	0.14401	0.206437	0.319805
clu_9971_NA	scaffold4473:858130-870064	0.398898	4.1e-31	0.335302	0.198915	0.17755	0.424162	0.545626	g21421
clu_9971_NA	scaffold4473:858130-871086	0.392725	4.1e-31	0.0107915	0.395278	0.403517	0.0735363	0.152339	g21421
clu_9971_NA	scaffold4473:870111-871086	0.318654	4.1e-31	0.458538	0.150943	0.148086	0.179082	0.140487	g21421
clu_8474_NA	scaffold226:371904-411789	0.20929	4.46e-31	0.492258	0.447456	0.430479	0.276752	0.281023	g25042
clu_11561_NA	scaffold1177:9782-29201	0.698803	2.38e-30	0.962023	0.930186	0.966047	0.677071	0.442718	g43172	lissencephaly-1 homolog
clu_11561_NA	scaffold1177:12906-29201	0.372997	2.38e-30	0.000288159	0.000228738	7.45e-05	0.209533	0.373041	g43172	lissencephaly-1 homolog
clu_11561_NA	scaffold1177:9782-12875	0.370262	2.38e-30	0.11694	0.083754	0.0547388	0.219483	0.3703	g43172	lissencephaly-1 homolog
clu_7449_NA	scaffold45726:47349-54325	0.522555	4.23e-30	0.565665	0.441163	0.356737	0.301768	0.127132	g32558,g32559	inositol polyphosphate-5-phosphatase A-like isoform X3, Transposon Ty3-I Gag-Pol polyprotein
clu_7449_NA	scaffold45726:40484-42178	0.383326	4.23e-30	0.00717622	0.000137847	0.000576002	0.0909722	0.383902	g32558,g32559	inositol polyphosphate-5-phosphatase A-like isoform X3, Transposon Ty3-I Gag-Pol polyprotein
clu_7449_NA	scaffold45726:40484-45967	0.354612	4.23e-30	0.414421	0.442956	0.422108	0.369767	0.191402	g32558,g32559	inositol polyphosphate-5-phosphatase A-like isoform X3, Transposon Ty3-I Gag-Pol polyprotein
clu_8079_NA	scaffold811-2:1345444-1353714	0.396932	2.22e-29	0.649959	0	0	0.99996	0.603013	g44059
clu_8079_NA	scaffold811-2:1353851-1363159	0.355012	2.22e-29	0.000540796	0	0	2.51e-05	0.355037	g44059
clu_8079_NA	scaffold811-2:1353851-1359854	0.297416	2.22e-29	0.29745	0	0	3.38e-05	0.0167738	g44059
clu_5035_NA	scaffold7546:264949-269485	0.46002	2.25e-28	0.797738	0.762997	0.768453	0.734147	0.337653	g39190	nucleolar protein 58-like
clu_5035_NA	scaffold7546:267295-269485	0.320937	2.25e-28	0.0177894	0.056799	0.053599	0.107665	0.338709	g39190	nucleolar protein 58-like
clu_5035_NA	scaffold7546:264949-266696	0.258865	2.25e-28	0.0241643	0.0556179	0.0621856	0.105809	0.282554	g39190	nucleolar protein 58-like
clu_10162_NA	scaffold2394-1:1454778-1465975	0.203674	2.63e-28	0.981847	1	1	0.886999	0.799123	g8034
clu_9830_NA	scaffold756-9:5827364-5831518	0.349807	6.73e-28	0.478597	0.130395	0.13143	0.106581	0.141754	g44559
clu_9830_NA	scaffold756-9:5825633-5831518	0.320507	6.73e-28	0.0111957	0.129594	0.284215	0.234773	0.329976	g44559
clu_5034_NA	scaffold7546:260995-263307	0.403232	8.32e-28	0.114797	0.38034	0.408843	0.367364	0.272533	g39190	nucleolar protein 58-like
clu_5034_NA	scaffold7546:260995-261695	0.258447	8.32e-28	0.00773814	0.00301833	1.61e-05	0.0350707	0.266186	g39190	nucleolar protein 58-like
clu_5034_NA	scaffold7546:260995-262388	0.242411	8.32e-28	0.560125	0.349479	0.329951	0.330822	0.296502	g39190	nucleolar protein 58-like
clu_8048_NA	scaffold74655:1645914-1671349	0.865864	2.38e-27	0	0.996063	0.992595	0.925002	0.130345	g49497	jagunal, isoform A
clu_8048_NA	scaffold74655:1669880-1671349	0.378986	2.38e-27	0	0.00126772	0.00395203	0.041957	0.380254	g49497	jagunal, isoform A
clu_8047_NA	scaffold11892:50742-62391	0.290053	5.35e-27	0.0209465	0.0220336	0.0898275	0.0680965	0.310999	g12523
clu_8047_NA	scaffold11892:50742-62963	0.264024	5.35e-27	0.861303	0.907324	0.849397	0.887109	0.654085	g12523
clu_8394_NA	scaffold7477-4:3698604-3702648	0.357064	1.6e-26	0	0.436541	0.316881	0.146716	0.0806532	g40013
clu_8394_NA	scaffold7477-4:3698116-3702648	0.338801	1.6e-26	0	0.093071	0.199717	0.383656	0.431435	g40013
clu_8394_NA	scaffold7477-4:3693441-3698015	0.315255	1.6e-26	0	0.0914899	0.204288	0.343478	0.406443	g40013
clu_8394_NA	scaffold7477-4:3693441-3698482	0.287251	1.6e-26	0	0.363457	0.268831	0.122894	0.0764172	g40013
clu_5145_NA	scaffold11088-7:205997-208576	0.31189	1.67e-25	0.000508876	0.311985	0.192483	0.098448	0.0652205	g10803
clu_5145_NA	scaffold11088-7:205997-213444	0.223353	1.67e-25	0.522583	0.193719	0.270782	0.287576	0.309663	g10803
clu_5145_NA	scaffold11088-7:208607-213444	0.205373	1.67e-25	0.0746061	0.253447	0.163065	0.0719632	0.048139	g10803
clu_8188_NA	scaffold3556:116913-123364	0.331238	2.82e-25	0	0.797486	0.805218	0.473406	0.476005	g16564
clu_8188_NA	scaffold3556:123015-123364	0.246182	2.82e-25	0	0.00854164	0.0135494	0.25107	0.254704	g16564
clu_1437_NA	scaffold11649:464801-466145	0.241183	3.78e-25	0.029144	0.206969	0.179262	0.221501	0.267531	g13108
clu_1437_NA	scaffold11649:458554-477559	0.237363	3.78e-25	0.241326	0.00252915	0.0160673	0.0128566	0.00874121	g13108
clu_1437_NA	scaffold11649:458554-464646	0.225677	3.78e-25	0.0583845	0.228968	0.173559	0.253022	0.282901	g13108
clu_1437_NA	scaffold11649:458554-466145	0.203337	3.78e-25	0.306478	0.198232	0.224908	0.164372	0.0962115	g13108
clu_5442_NA	scaffold8683:445477-459540	0.851457	8.14e-25	4.14e-05	0.335611	0.851499	0	0	g2435	predicted protein
clu_5442_NA	scaffold8683:455422-459540	0.659238	8.14e-25	0.737678	0.742819	0.118795	0	0	g2435	predicted protein
clu_9078_NA	scaffold5691:1265756-1275092	0.317859	9.46e-25	0	0	0	0.660856	0.978715	g19322
clu_1869_NA	scaffold9700:4753-11492	0.213708	2.37e-24	0.987197	0.983176	0.986571	0.810846	0.77637	g1641
clu_5906_NA	scaffold1180:1033719-1051269	0.374662	7.12e-24	0.990254	0.993327	0.994779	0.929124	0.618782	g43204
clu_5906_NA	scaffold1180:1050420-1051269	0.203665	7.12e-24	0.000368197	0.00100642	0.000788004	0.0379475	0.204033	g43204
clu_10030_NA	scaffold517588:3236-5051	0.302349	9.2e-24	0.5111	0.372321	0.364781	0.34935	0.203157
clu_10030_NA	scaffold517588:5707-8662	0.298382	9.2e-24	0.0650319	0.19313	0.131219	0.167953	0.302819
clu_10030_NA	scaffold517588:3236-5513	0.295355	9.2e-24	0.0143686	0.212812	0.125487	0.150382	0.298106
clu_10030_NA	scaffold517588:5245-8662	0.291388	9.2e-24	0.487317	0.354575	0.374435	0.332229	0.205254
clu_10924_NA	scaffold9636-1:18769-25936	0.419885	1.06e-23	0	0.239997	0.20288	0.295076	0.62368	g1372
clu_10924_NA	scaffold9636-1:23036-25936	0.312619	1.06e-23	0	0.380883	0.408654	0.305006	0.12677	g1372
clu_10924_NA	scaffold9636-1:18769-23004	0.226407	1.06e-23	0	0.383366	0.388465	0.321703	0.168951	g1372
clu_5781_NA	scaffold302:10093-15630	0.693548	3.3e-23	0.215802	0.905642	0.839038	0.862845	0.852622	g25931	forkhead box protein N4-like isoform X2
clu_5781_NA	scaffold302:10093-25969	0.654303	3.3e-23	0.654303	0.0312733	0.0113132	8.95e-05	3.55e-07	g25931	forkhead box protein N4-like isoform X2
clu_231_NA	scaffold148899:10987-20950	0.607759	7.29e-23	0	0.0244159	0.134496	0.633524	0.55458
clu_231_NA	scaffold148899:10987-18416	0.596277	7.29e-23	0	0.961037	0.859734	0.362306	0.42807
clu_11940_NA	scaffold3599:1144380-1177293	0.42792	8.59e-23	0.438367	0.335929	0.296629	0.0815028	0.0104467	g16644,g16645	eukaryotic translation initiation factor 4E member 2 variant, partial
clu_11940_NA	scaffold3599:1144380-1151116	0.40033	8.59e-23	0.00812703	0.0748791	0.193681	0.407703	0.403294	g16644,g16645	eukaryotic translation initiation factor 4E member 2 variant, partial
clu_7541_NA	scaffold12675:199588-209552	0.525916	1.12e-22	0	0	0.993573	0.726529	0.467657	g28287
clu_7541_NA	scaffold12675:208718-209552	0.269577	1.12e-22	0	0	0.00169576	0.14014	0.271231	g28287
clu_5192_NA	scaffold252218:30149-31080	0.550272	1.97e-22	0.348273	0.898545	0	0	0
clu_5192_NA	scaffold252218:31327-31847	0.314253	1.97e-22	0.329032	0.0147786	0	0	0
clu_6433_NA	scaffold8757-1:282828-294173	0.577171	1.97e-22	0.977938	0.851193	0.737232	0.398699	0.444755	g2565	ras-specific guanine nucleotide-releasing factor RalGPS2-like isoform X2
clu_6433_NA	scaffold8757-1:291934-294173	0.315754	1.97e-22	0.00019711	0.025537	0.134522	0.283346	0.315756	g2565	ras-specific guanine nucleotide-releasing factor RalGPS2-like isoform X2
clu_6433_NA	scaffold8757-1:282828-291863	0.229187	1.97e-22	0.0222004	0.0194302	0.107439	0.24962	0.239489	g2565	ras-specific guanine nucleotide-releasing factor RalGPS2-like isoform X2
clu_3475_NA	scaffold64:226957-322352	0.904598	3.24e-22	0.0302664	0.763345	0.715777	0.934717	0.627729
clu_3475_NA	scaffold64:226957-232944	0.899645	3.24e-22	0.899645	0.00172637	4.98e-15	0.0081806	1.22e-06
clu_3475_NA	scaffold64:226957-275367	0.254203	3.24e-22	0.0707838	0.16313	0.284223	0.0587757	0.346039
clu_6950_NA	scaffold2126:128842-135899	0.465519	1.02e-21	0.999949	0.999963	0.999996	0.808693	0.534366	g5906	serine/threonine-protein phosphatase 2B catalytic subunit 2 isoform X2
clu_6950_NA	scaffold2126:128842-130568	0.227272	1.02e-21	7.4e-05	0.000171542	5.13e-05	0.097521	0.227434	g5906	serine/threonine-protein phosphatase 2B catalytic subunit 2 isoform X2
clu_3459_NA	scaffold5068-1:13005912-13059839	0.700408	1.31e-21	0	0.81226	0.69616	0.25021	0.185895	g22956,g22957,g22955	putative biorientation of chromosomes in cell division protein 1
clu_3459_NA	scaffold5068-1:12963881-13028083	0.461463	1.31e-21	0	0.000650335	0.00157304	0.351354	0.462113	g22956,g22957,g22955	putative biorientation of chromosomes in cell division protein 1
clu_3459_NA	scaffold5068-1:13028187-13059842	0.387955	1.31e-21	0	0.337638	0.201928	0.417876	0.479939	g22956,g22957,g22955	putative biorientation of chromosomes in cell division protein 1
clu_3782_NA	scaffold2417-1:266898-268542	0.348573	3.3e-21	0	0.596293	0.600852	0.263747	0.269172	g8215
clu_3782_NA	scaffold2417-1:269806-271770	0.298266	3.3e-21	0	9.17e-05	0.0164082	0.238307	0.317471	g8215
clu_3782_NA	scaffold2417-1:266898-269646	0.296916	3.3e-21	0	9.43e-05	0.010846	0.289659	0.296922	g8215
clu_3782_NA	scaffold2417-1:268729-271770	0.246609	3.3e-21	0	0.423018	0.39272	0.210852	0.167751	g8215
clu_8120_NA	scaffold945-1:840730-844895	0.294154	8.76e-21	0.515165	0.221421	0.252655	0.333381	0.231636	g43378
clu_8120_NA	scaffold945-1:840730-846895	0.287066	8.76e-21	0.0230207	0.301303	0.273525	0.212357	0.310101	g43378
clu_8120_NA	scaffold945-1:845101-848319	0.246746	8.76e-21	0.442967	0.195585	0.262142	0.326264	0.273792	g43378
clu_8120_NA	scaffold945-1:847110-848319	0.223285	8.76e-21	0.0078739	0.231229	0.177418	0.11795	0.182271	g43378
clu_11639_NA	scaffold444110:15490-16756	0.205787	1.08e-20	0.307017	0.393728	0.456596	0.512804	0.482376
clu_4818_NA	scaffold12031-2:318188-324373	0.442051	1.27e-20	0.693452	0.379647	0.369465	0.250023	0.263406	g29654
clu_4818_NA	scaffold12031-2:318188-335094	0.404282	1.27e-20	0.0352906	0.109759	0.165836	0.41809	0.439572	g29654
clu_4818_NA	scaffold12031-2:324460-335094	0.241279	1.27e-20	0.267787	0.509593	0.4644	0.328415	0.310839	g29654
clu_5481_NA	scaffold71507:86030-101640	0.549358	2.14e-20	1	0.966253	0.981483	0.905559	0.450533	g49330	adenylyl cyclase-associated protein 1 isoform b
clu_10663_NA	scaffold282:512105-539486	0.233719	7.29e-20	0.250386	0.0228665	0.0166666	0.05492	0.0630382	g25852,g25850,g25851
clu_11871_NA	scaffold265712:4252-10453	0.931961	8.53e-20	0.0229686	0.968633	0.760908	0.655618	0.794813	g47700	protein transport protein Sec31A-like
clu_11871_NA	scaffold265712:8115-10453	0.374426	8.53e-20	0.392534	0.0181077	0.0975785	0.131274	0.0784194	g47700	protein transport protein Sec31A-like
clu_11871_NA	scaffold265712:4252-4640	0.238303	8.53e-20	0.263501	0.021681	0.0606018	0.186832	0.122602	g47700	protein transport protein Sec31A-like
clu_8816_NA	scaffold5764-3:4447753-4454076	0.532334	3.11e-19	0	0.999464	0.99215	0.788652	0.570351
clu_8816_NA	scaffold5764-3:4447753-4450265	0.326034	3.11e-19	0	7.42e-07	0.000155154	0.058815	0.326189
clu_2574_NA	scaffold14157:32737-33772	0.270089	3.45e-19	0.00662735	9.56e-06	0.0116601	0.270568	0.158756	g35151
clu_12145_NA	scaffold2999:285797-323813	0.619712	5.11e-19	0.335671	0.920211	0.955383	0.81079	0.717247	g19179	klarsicht protein
clu_12145_NA	scaffold2999:308994-323813	0.552695	5.11e-19	0.574769	0.0522147	0.0171474	0.027619	0.0510267	g19179	klarsicht protein
clu_3809_NA	scaffold252201:934-14687	0.598633	2.57e-18	0.598633	2.97e-06	0.16231	9.25e-08	0
clu_3809_NA	scaffold252201:1878-14687	0.538902	2.57e-18	0.0976061	0.448234	0.636508	0.462363	0
clu_3809_NA	scaffold252201:934-1837	0.383831	2.57e-18	0.282714	0.515995	0.503866	0.48071	0
clu_54_NA	scaffold11979:182268-183352	0.66844	2.79e-18	0	0.770298	0.78545	0.512893	0.1168	g29584	Otopetrin-like b, isoform A
clu_54_NA	scaffold11979:182906-183352	0.492494	2.79e-18	0	0.0460321	0.0398913	0.202192	0.533696	g29584	Otopetrin-like b, isoform A
clu_10156_NA	scaffold2394-1:532403-555836	0.289033	3.3e-18	0	0.722567	0.634434	0.862992	0.926799	g8018
clu_7839_NA	scaffold658426:8618-9915	0.480956	3.42e-18	0	0	0	0.426559	0.907516
clu_7839_NA	scaffold658426:7718-9915	0.28722	3.42e-18	0	0	0	0.301959	0.0147388
clu_7839_NA	scaffold658426:5811-9915	0.254109	3.42e-18	0	0	0	0.267149	0.0130398
clu_12005_NA	scaffold1225:626608-695472	0.732986	3.85e-18	0.0952686	0.625744	0.588618	0.274469	0.762859	g42563,g42564,g42561	retinoid-inducible serine carboxypeptidase-like
clu_12005_NA	scaffold1225:686713-700464	0.628641	3.85e-18	0.0765983	0.0316861	0.250668	0.628641	0.0938423	g42563,g42564,g42561	retinoid-inducible serine carboxypeptidase-like
clu_12005_NA	scaffold1225:686713-688297	0.597684	3.85e-18	0.597688	0.0448249	3.56e-06	0.0556138	0.138034	g42563,g42564,g42561	retinoid-inducible serine carboxypeptidase-like
clu_12005_NA	scaffold1225:686713-695472	0.422028	3.85e-18	0.719773	0.392212	0.163344	0.164395	0.262852	g42563,g42564,g42561	retinoid-inducible serine carboxypeptidase-like
clu_9497_NA	scaffold911:191936-196379	0.89007	5.03e-18	0.00585151	0.895651	0.834481	0.618401	0.510234	g43238	annexin B9, isoform A
clu_9497_NA	scaffold911:178277-196379	0.679827	5.03e-18	0.761117	0.0921021	0.115329	0.283855	0.327666	g43238	annexin B9, isoform A
clu_7773_NA	scaffold34884-1:3321135-3330135	0.883048	7.83e-18	0.883211	0	0.00741107	0.000163574	0	g31575	putative cap-specific mRNA (nucleoside-2'-O-)-methyltransferase 2
clu_7773_NA	scaffold34884-1:3321316-3330135	0.626968	7.83e-18	0.116683	0	0.191749	0.748326	0	g31575	putative cap-specific mRNA (nucleoside-2'-O-)-methyltransferase 2
clu_7773_NA	scaffold34884-1:3312324-3330135	0.392689	7.83e-18	0.0029456	0	0.405957	0.103675	0	g31575	putative cap-specific mRNA (nucleoside-2'-O-)-methyltransferase 2
clu_7773_NA	scaffold34884-1:3270092-3312279	0.362219	7.83e-18	4.71e-05	0	0.36303	0.104121	0	g31575	putative cap-specific mRNA (nucleoside-2'-O-)-methyltransferase 2
clu_8982_NA	scaffold4164-1:122641-126724	0.223211	1.13e-17	0.000136092	0.00582811	0.0143089	0.163941	0.228569	g13434
clu_8982_NA	scaffold4164-1:124042-127658	0.211603	1.13e-17	0.49689	0.434014	0.46113	0.285371	0.335562	g13434
clu_11225_NA	scaffold3032-5:79982-82725	0.663163	2.06e-17	0.0212577	0.031161	0	0.424112	0.674065	g18336	LOW QUALITY PROTEIN: cytosolic 10-formyltetrahydrofolate dehydrogenase-like
clu_11225_NA	scaffold3032-5:68046-82725	0.558173	2.06e-17	0.407823	0.969668	0	0.576987	0.475423	g18336	LOW QUALITY PROTEIN: cytosolic 10-formyltetrahydrofolate dehydrogenase-like
clu_11225_NA	scaffold3032-5:50221-67897	0.321175	2.06e-17	0.32118	0.0282438	0	4.85e-06	0.104475	g18336	LOW QUALITY PROTEIN: cytosolic 10-formyltetrahydrofolate dehydrogenase-like
clu_11225_NA	scaffold3032-5:50221-82725	0.278671	2.06e-17	0.278675	0.0246357	0	4.21e-06	0.0870435	g18336	LOW QUALITY PROTEIN: cytosolic 10-formyltetrahydrofolate dehydrogenase-like
clu_7838_NA	scaffold658426:3032-8540	0.487733	2.45e-17	0	0	0	0.436501	0.924234
clu_7838_NA	scaffold658426:3032-7640	0.300931	2.45e-17	0	0	0	0.313226	0.0122956
clu_7838_NA	scaffold658426:3032-5733	0.231763	2.45e-17	0	0	0	0.241233	0.00946955
clu_1911_NA	scaffold4510-6:2600660-2610529	0.495998	2.66e-17	0.622798	0.543102	0.527752	0.261005	0.114652	g21774,g21775	PDZ and LIM domain protein Zasp-like
clu_10317_NA	scaffold3305-2:4633301-4645063	0.368624	2.66e-17	0.403965	0.0353407	0.0945827	0.106231	0.08272
clu_10317_NA	scaffold3305-2:4634767-4651503	0.311293	2.66e-17	0.0206004	0.320723	0.334964	0.10611	0.135817
clu_1911_NA	scaffold4510-6:2600314-2610529	0.308694	2.66e-17	0.000336363	0.00392035	0.00675895	0.30903	0.215136	g21774,g21775	PDZ and LIM domain protein Zasp-like
clu_1911_NA	scaffold4510-6:2600636-2610529	0.298952	2.66e-17	0.339853	0.205823	0.199719	0.160321	0.100534	g21774,g21775	PDZ and LIM domain protein Zasp-like
clu_10317_NA	scaffold3305-2:4633301-4651503	0.286011	2.66e-17	0.306316	0.53176	0.306777	0.256346	0.251245
clu_1911_NA	scaffold4510-6:2594273-2594436	0.243115	2.66e-17	0.0616385	0.0431923	0.0515158	0.0664094	0.286818	g21774,g21775	PDZ and LIM domain protein Zasp-like
clu_9852_NA	scaffold2062:551344-560953	0.637061	4.97e-17	0.0976858	0.540308	0.459219	0.583627	0.735295	g7460	ribosome-binding protein 1-like isoform X2
clu_9852_NA	scaffold2062:551344-559429	0.332191	4.97e-17	0.472088	0.240248	0.285989	0.223062	0.147061	g7460	ribosome-binding protein 1-like isoform X2
clu_9852_NA	scaffold2062:559512-560953	0.30487	4.97e-17	0.434529	0.221236	0.258496	0.198551	0.126949	g7460	ribosome-binding protein 1-like isoform X2
clu_6480_NA	scaffold8100:118677-130149	0.704678	6.51e-17	0.967363	0.373232	0.262686	0.346049	0.279473	g35988	polychaetoid, isoform I
clu_6480_NA	scaffold8100:118677-128743	0.555143	6.51e-17	0.0255706	0.508155	0.566046	0.473342	0.327746	g35988	polychaetoid, isoform I
clu_4918_NA	scaffold10230:30341-34476	0.276254	6.8e-17	0.0076823	0.0730063	0.0468264	0.283783	0.212059	g897
clu_9006_NA	scaffold3305-1:10594-30596	0.217537	1.12e-16	0.258219	0.39523	0.311119	0.303674	0.190596	g16021,g16022
clu_6378_NA	scaffold20:1159468-1169269	0.204993	1.24e-16	0.265414	0.4703	0.45834	0.464561	0.465871	g26680
clu_2480_NA	scaffold136153:2136-16152	0.518933	1.46e-16	0.999996	0	0	0.618546	0.481025
clu_2480_NA	scaffold136153:12243-16152	0.264691	1.46e-16	1.88e-05	0	0	0.194453	0.26471
clu_2480_NA	scaffold136153:2136-12117	0.254242	1.46e-16	2.28e-05	0	0	0.189494	0.254527
clu_6318_NA	scaffold1156:686814-697965	0.918272	1.5e-16	0.986958	0	0	0.223056	0.0686357
clu_6318_NA	scaffold1156:693354-697965	0.431036	1.5e-16	0.000386857	0	0	0.347919	0.431231
clu_6318_NA	scaffold1156:693339-697965	0.262398	1.5e-16	0.00773388	0	0	0.271197	0.270132
clu_6318_NA	scaffold1156:686814-693200	0.224838	1.5e-16	0.0051638	0	0	0.16317	0.235187
clu_8895_NA	scaffold1116-2:50376-53472	0.610489	1.66e-16	0.968399	0.360563	0.47065	0.641041	0.355608	g43769	WD repeat-containing protein 1-B-like
clu_8895_NA	scaffold1116-2:52085-53472	0.33107	1.66e-16	0.00981143	0.314602	0.248097	0.168237	0.340763	g43769	WD repeat-containing protein 1-B-like
clu_8895_NA	scaffold1116-2:50376-51953	0.291958	1.66e-16	0.0218587	0.314191	0.27531	0.190721	0.294648	g43769	WD repeat-containing protein 1-B-like
clu_10005_NA	scaffold6848-2:921929-925924	0.534313	1.89e-16	0.0263717	0.0406827	0.0319237	0.233368	0.559755	g36788	nuclear autoantigenic sperm protein isoform X3
clu_10005_NA	scaffold6848-2:924619-925924	0.326354	1.89e-16	0.603721	0.562329	0.558634	0.430244	0.268899	g36788	nuclear autoantigenic sperm protein isoform X3
clu_10005_NA	scaffold6848-2:921929-924563	0.222717	1.89e-16	0.379305	0.398524	0.42478	0.349986	0.199026	g36788	nuclear autoantigenic sperm protein isoform X3
clu_381_NA	scaffold243-3:268964-275574	0.456438	2.06e-16	0	0	0.0126264	0.311306	0.466094	g25244	protein turtle-like
clu_381_NA	scaffold243-3:276602-322562	0.411656	2.06e-16	0	0	0.435472	0.275391	0.0286027	g25244	protein turtle-like
clu_381_NA	scaffold243-3:268964-276525	0.401355	2.06e-16	0	0	0.424588	0.192372	0.0232335	g25244	protein turtle-like
clu_381_NA	scaffold243-3:275645-322547	0.341269	2.06e-16	0	0	0.14485	0.182219	0.360918	g25244	protein turtle-like
clu_9143_NA	scaffold8979:29341-30239	0.759004	2.49e-16	0	0.0828607	0.836796	0.617675	0.433091	g2808
clu_9143_NA	scaffold8979:29341-31347	0.608932	2.49e-16	0	0.695131	0.0535146	0.203198	0.536949	g2808
clu_7151_NA	scaffold403153:1555-15090	0.401397	3.84e-16	0.616218	0.353156	0.450687	0.472139	0.754666
clu_7151_NA	scaffold403153:1321-15090	0.396449	3.84e-16	0.382332	0.639855	0.541889	0.52217	0.243499
clu_4994_NA	scaffold669860:790-1806	0.252741	4.71e-16	0	0	0	0.592152	0.339411
clu_4994_NA	scaffold669860:1581-1806	0.205449	4.71e-16	0	0	0	0.112436	0.317885
clu_4994_NA	scaffold669860:790-1551	0.205347	4.71e-16	0	0	0	0.0760696	0.281416
clu_11153_NA	scaffold12535:262748-263626	0.375442	5.84e-16	0.746391	0.564441	0.546108	0.352847	0.404445	g28065
clu_11153_NA	scaffold12535:217344-263626	0.357	5.84e-16	0.102762	0.139061	0.152907	0.343366	0.456289	g28065
clu_11153_NA	scaffold12535:261292-263626	0.320272	5.84e-16	0.110696	0.355407	0.373969	0.299378	0.167086	g28065
clu_7377_NA	scaffold10338:29868-37195	0.303036	6.57e-16	0	0.369619	0.120437	0.0667483	0.156723
clu_7610_NA	scaffold8633-6:1014747-1057178	0.977387	6.66e-16	0.999994	0	0.0270724	0.117857	0.862349	g4462	calpain-B-like, partial
clu_7610_NA	scaffold8633-6:1042510-1057178	0.855813	6.66e-16	5.74e-05	0	0.886149	0.404436	0.0945227	g4462	calpain-B-like, partial
clu_10292_NA	scaffold5414:134782-142885	0.468398	9.45e-16	0.522946	0.091585	0.122866	0.054548	0.0664055	g23907	RNA-binding protein cabeza-like isoform X2
clu_10292_NA	scaffold5414:134782-143057	0.468398	9.45e-16	0.477054	0.902192	0.866288	0.946162	0.932068	g23907	RNA-binding protein cabeza-like isoform X2
clu_5472_NA	scaffold778:7832-62703	0.238167	1e-15	0	0.00372837	0.0353795	0.0886214	0.253292	g44877
clu_5472_NA	scaffold778:59393-62703	0.228107	1e-15	0	0.93957	0.930342	0.896945	0.736734	g44877
clu_9532_NA	scaffold81945:151818-240320	0.844302	1.41e-15	0.855475	0.00313713	0.0299735	0.0619354	0.0352029	g49658	coactosin-like protein isoform X2
clu_9532_NA	scaffold81945:151818-209018	0.833468	1.41e-15	0.106728	0.956183	0.716617	0.87575	0.936053	g49658	coactosin-like protein isoform X2
clu_9532_NA	scaffold81945:151818-158293	0.223895	1.41e-15	0.0460729	0.059712	0.253544	0.0626161	0.0393711	g49658	coactosin-like protein isoform X2
clu_7755_NA	scaffold3502:16889-80527	0.366552	1.5e-15	1.49e-05	0.0900282	0.137079	0.368091	0.177889	g17281
clu_2344_NA	scaffold214-1:530265-543882	0.697287	2.32e-15	0.581848	0.104501	0.256639	0.30163	0.802243	g24826	Na+/K+ ATPase alpha subunit
clu_2344_NA	scaffold214-1:533980-543882	0.463428	2.32e-15	0.265586	0.595179	0.531444	0.447262	0.140754	g24826	Na+/K+ ATPase alpha subunit
clu_2344_NA	scaffold214-1:530265-533900	0.233859	2.32e-15	0.183019	0.3056	0.215796	0.26509	0.0723799	g24826	Na+/K+ ATPase alpha subunit
clu_6819_NA	scaffold19517:186374-194553	0.756799	2.77e-15	0	0	0.998776	0.883946	0.241977	g33434	poly(U)-specific endoribonuclease-D-like
clu_6819_NA	scaffold19517:186374-192051	0.399802	2.77e-15	0	0	0.00125235	0.0540072	0.400943	g33434	poly(U)-specific endoribonuclease-D-like
clu_6819_NA	scaffold19517:192164-194553	0.356997	2.77e-15	0	0	8.28e-05	0.0666146	0.358714	g33434	poly(U)-specific endoribonuclease-D-like
clu_11134_NA	scaffold1069617:8926-10541	0.593627	3.17e-15	0.372348	0	0	0	0.965975
clu_11134_NA	scaffold1069617:9479-10541	0.340441	3.17e-15	0.359955	0	0	0	0.0195132
clu_7384_NA	scaffold42600-11:477171-480246	0.233116	3.88e-15	0.179361	0.0335323	0.074662	0.196309	0.239385	g32304
clu_7384_NA	scaffold42600-11:477171-533003	0.202641	3.88e-15	0.83713	0.728607	0.706763	0.580571	0.585249	g32304
clu_11636_NA	scaffold10274:20403-29755	0.731172	4.01e-15	0.00808242	0.138639	0.152829	0.379238	0.739559	g1015	WD repeat and SOCS box-containing protein 1-like isoform X2
clu_11636_NA	scaffold10274:20403-27935	0.385016	4.01e-15	0.524125	0.456628	0.449579	0.327753	0.137361	g1015	WD repeat and SOCS box-containing protein 1-like isoform X2
clu_11636_NA	scaffold10274:27952-29755	0.346156	4.01e-15	0.469653	0.410309	0.4041	0.299844	0.125796	g1015	WD repeat and SOCS box-containing protein 1-like isoform X2
clu_11487_NA	scaffold34117:892410-903689	0.535802	6.03e-15	0.713304	0.178749	0.36039	0.46073	0.481249	g31408	kinesin light chain-like isoform X1
clu_11487_NA	scaffold34117:897037-903689	0.300675	6.03e-15	0.0882096	0.394261	0.279765	0.247867	0.210475	g31408	kinesin light chain-like isoform X1
clu_11487_NA	scaffold34117:892410-896996	0.265844	6.03e-15	0.113043	0.386286	0.301006	0.229874	0.22739	g31408	kinesin light chain-like isoform X1
clu_3741_NA	scaffold2254:766936-768570	0.396249	6.49e-15	0.603732	0.979582	0.99043	0.994262	1	g6722
clu_6249_NA	scaffold2345-2:563524-571361	0.322383	6.69e-15	0	0.999995	0.999993	0.831539	0.677613	g9732
clu_6376_NA	scaffold20:987122-1003393	0.728916	8.59e-15	0.476235	0.193784	0.546573	0.594366	0.922676	g26676	adenosine kinase-like
clu_6376_NA	scaffold20:950621-1003393	0.675638	8.59e-15	0.241242	0.757136	0.40022	0.386624	0.076879	g26676	adenosine kinase-like
clu_6484_NA	scaffold8100:816471-823500	0.781713	8.74e-15	0.781751	6.52e-10	0.0022199	4.44e-06	3.73e-05	g35994,g35995	protein pygopus-like
clu_6484_NA	scaffold8100:816471-824260	0.457457	8.74e-15	0.124778	0.582456	0.566466	0.5651	0.571229	g35994,g35995	protein pygopus-like
clu_6484_NA	scaffold8100:824327-832167	0.338519	8.74e-15	0.0963763	0.389159	0.419325	0.436153	0.43357	g35994,g35995	protein pygopus-like
clu_9250_NA	scaffold8412:89110-92580	0.532359	9.94e-15	0	0.688098	0.435951	0.963024	0.968766	g4022	laminin subunit gamma-1-like isoform X4
clu_9250_NA	scaffold8412:89110-91117	0.271011	9.94e-15	0	0.176113	0.293965	0.0192119	0.0177651	g4022	laminin subunit gamma-1-like isoform X4
clu_9250_NA	scaffold8412:91146-92580	0.261347	9.94e-15	0	0.165582	0.285241	0.0182283	0.0164529	g4022	laminin subunit gamma-1-like isoform X4
clu_6916_NA	scaffold99:422665-429006	0.216122	1.01e-14	0.0130462	0.0198237	0.0106086	0.147426	0.22652	g27860
clu_11233_NA	scaffold46-1:95517-106350	0.578851	1.05e-14	0.934187	0.581716	0.720366	0.353969	0.399698	g27076	lethal (1) G0289, isoform B
clu_11233_NA	scaffold46-1:101303-106350	0.315157	1.05e-14	0.0273302	0.220759	0.140841	0.342623	0.30959	g27076	lethal (1) G0289, isoform B
clu_11233_NA	scaffold46-1:95517-101211	0.259345	1.05e-14	0.0393013	0.193884	0.138793	0.299076	0.290711	g27076	lethal (1) G0289, isoform B
clu_5196_NA	scaffold71461:1616182-1620612	0.804998	1.79e-14	0.840097	0.108563	0.0348167	0.0456874	0.0737732	g50121	phosphoinositide 3-kinase regulatory subunit 4-like isoform X2
clu_5196_NA	scaffold71461:1616182-1618300	0.497636	1.79e-14	0.101701	0.479555	0.592106	0.599631	0.551179	g50121	phosphoinositide 3-kinase regulatory subunit 4-like isoform X2
clu_5196_NA	scaffold71461:1618359-1620612	0.354462	1.79e-14	0.0593531	0.415137	0.37419	0.355245	0.375899	g50121	phosphoinositide 3-kinase regulatory subunit 4-like isoform X2
clu_7121_NA	scaffold78-1452:472781-480870	0.425757	1.85e-14	1.6e-06	0.425758	0	1.26e-06	0	g27687,g27688
clu_7121_NA	scaffold78-1452:427627-431067	0.304324	1.85e-14	0.340656	0.125202	0	0.0363902	0	g27687,g27688
clu_7121_NA	scaffold78-1452:427627-480870	0.243451	1.85e-14	0.0424768	0.0231431	0	0.271907	0	g27687,g27688
clu_3119_NA	scaffold55-2:4200894-4226292	0.827298	2e-14	0.827308	4.13e-09	0.000106048	9.63e-06	0	g27340	carboxy-terminal kinesin 2-like isoform X2
clu_3119_NA	scaffold55-2:4201467-4226292	0.349575	2e-14	0.036979	0.386554	0.344375	0.372312	0	g27340	carboxy-terminal kinesin 2-like isoform X2
clu_3119_NA	scaffold55-2:4200894-4201363	0.339046	2e-14	0.0410992	0.356422	0.3854	0.290994	0	g27340	carboxy-terminal kinesin 2-like isoform X2
clu_3119_NA	scaffold55-2:4200894-4201351	0.242795	2e-14	0.103073	0.271739	0.275824	0.339008	0	g27340	carboxy-terminal kinesin 2-like isoform X2
clu_2018_NA	scaffold892-2:1381103-1386832	0.997266	2.01e-14	0.997268	0	1.24e-06	0	0	g44358	zinc finger SWIM domain-containing protein 7-like
clu_2018_NA	scaffold892-2:1383178-1386832	0.600988	2.01e-14	0.000176312	0	0.601164	0	0	g44358	zinc finger SWIM domain-containing protein 7-like
clu_2018_NA	scaffold892-2:1383328-1386832	0.352858	2.01e-14	0.001281	0	0.354139	0	0	g44358	zinc finger SWIM domain-containing protein 7-like
clu_11903_NA	scaffold495:360346-380927	0.427849	2.12e-14	0	0	0	0.888479	0.460631	g28872
clu_11903_NA	scaffold495:379696-380927	0.255372	2.12e-14	0	0	0	0.0724821	0.327854	g28872
clu_1424_NA	scaffold898-2:714324-717818	0.410619	2.48e-14	2.15e-05	0.00493685	0.0985767	0.410847	0.288848	g44385
clu_1424_NA	scaffold898-2:717630-717818	0.213536	2.48e-14	0.528516	0.528467	0.481487	0.314271	0.379755	g44385
clu_383_NA	scaffold243-3:338583-352057	0.945683	2.99e-14	0	0	0.962562	0.186801	0.01694	g25245	turtle, isoform J
clu_383_NA	scaffold243-3:346094-352057	0.519265	2.99e-14	0	0	0.00960671	0.483594	0.528872	g25245	turtle, isoform J
clu_383_NA	scaffold243-3:338583-346000	0.426418	2.99e-14	0	0	0.0278314	0.30933	0.454249	g25245	turtle, isoform J
clu_4703_NA	scaffold248:239471-250995	0.229625	3.51e-14	0.514118	0.527473	0.450381	0.445762	0.365065	g25318
clu_3088_NA	scaffold273-1:870641-879448	0.586943	3.57e-14	0.99999	0.999997	0.994006	0.629008	0.413095	g25591	guanine nucleotide exchange factor for Rab-3A
clu_3088_NA	scaffold273-1:870641-878703	0.30547	3.57e-14	2.47e-05	2.93e-06	0.00314197	0.192793	0.313311	g25591	guanine nucleotide exchange factor for Rab-3A
clu_3088_NA	scaffold273-1:878723-879448	0.281473	3.57e-14	2.85e-05	3.35e-06	0.00306769	0.184523	0.285069	g25591	guanine nucleotide exchange factor for Rab-3A
clu_9231_NA	scaffold15650-3:1634487-1638783	0.385801	3.65e-14	0	0	0	0.558031	0.943832	g34968
clu_9231_NA	scaffold15650-3:1634487-1640279	0.211624	3.65e-14	0	0	0	0.232947	0.0213226	g34968
clu_11056_NA	scaffold8870-1:871526-882883	0.993598	3.67e-14	0.993598	0	0.0149882	0.0177514	2.7e-14	g2726	cellular retinaldehyde binding protein
clu_11056_NA	scaffold8870-1:871526-891409	0.993598	3.67e-14	0.00640198	0	0.364134	0.811039	1	g2726	cellular retinaldehyde binding protein
clu_11056_NA	scaffold8870-1:871526-877300	0.599474	3.67e-14	0.00155105	0	0.607369	0.188961	1.03e-06	g2726	cellular retinaldehyde binding protein
clu_6804_NA	scaffold62235-1:156791-166382	0.500099	3.93e-14	0.018126	0.0573136	0.076342	0.146592	0.514601	g49806	amphiphysin, isoform B
clu_6804_NA	scaffold62235-1:156821-166382	0.45426	3.93e-14	0.0953693	0.36332	0.465049	0.561521	0.365186	g49806	amphiphysin, isoform B
clu_6804_NA	scaffold62235-1:159195-166382	0.257441	3.93e-14	0.449511	0.283616	0.251015	0.145194	0.192298	g49806	amphiphysin, isoform B
clu_6804_NA	scaffold62235-1:156821-158962	0.210626	3.93e-14	0.347899	0.295105	0.197428	0.13674	0.163177	g49806	amphiphysin, isoform B
clu_5053_NA	scaffold753:1081902-1087871	0.841279	4.2e-14	0.147824	0.796709	0.693164	0.980162	1	g44433	formin-like protein 2
clu_5053_NA	scaffold753:1081902-1083355	0.422166	4.2e-14	0.431738	0.108656	0.151128	0.0158274	0.0057811	g44433	formin-like protein 2
clu_5053_NA	scaffold753:1083410-1087871	0.419113	4.2e-14	0.433566	0.102136	0.167136	0.0198379	0.00555287	g44433	formin-like protein 2
clu_6708_NA	scaffold148181:13599-17184	0.278971	4.65e-14	0.989849	0.877962	0.7107	0.754794	0.765719
clu_7662_NA	scaffold1220146:15589-17658	0.233682	4.66e-14	0.556868	0.529866	0.523269	0.361783	0.325968
clu_6510_NA	scaffold989164:3861-8807	0.783461	6.66e-14	0.0899121	0.821758	0.850979	0.873373	0.827549
clu_6510_NA	scaffold989164:3861-3991	0.435431	6.66e-14	0.515653	0.0981711	0.0838033	0.0703763	0.100384
clu_6510_NA	scaffold989164:4029-8807	0.348031	6.66e-14	0.409245	0.0869791	0.0716402	0.0597107	0.077771
clu_1160_NA	scaffold2344:2302414-2379386	0.648319	7.85e-14	0.00625851	0.449076	0.654578	0.625335	0.576913	g9729
clu_1160_NA	scaffold2344:2302414-2381818	0.648319	7.85e-14	0.993868	0.52861	0.372865	0.344399	0.395566	g9729
clu_5025_NA	scaffold11507:192057-197760	0.270887	8.95e-14	0	0.714938	0.846294	0.952765	0.978972	g12789
clu_77_NA	scaffold6837:1296813-1305879	0.714351	9.1e-14	0.282452	0.966824	0.968881	0.994821	0.996679	g37681	tRNA selenocysteine 1-associated protein 1-like isoform X4
clu_77_NA	scaffold6837:1296813-1306095	0.696746	9.1e-14	0.70091	0.0343454	0.0312977	0.00529386	0.00344806	g37681	tRNA selenocysteine 1-associated protein 1-like isoform X4
clu_1476_NA	scaffold3435-7:2241171-2245148	0.398423	9.24e-14	0.00851827	0.0855196	0.119181	0.215446	0.410107	g15550
clu_1476_NA	scaffold3435-7:2241171-2245535	0.389562	9.24e-14	0.995076	0.914496	0.880849	0.764539	0.562877	g15550
clu_9916_NA	scaffold13307-1:8261-12568	0.341436	9.73e-14	0.658556	0.999992	0.969522	0	0	g15123
clu_9916_NA	scaffold13307-1:7800-8075	0.319994	9.73e-14	0.320176	7.25e-06	0.0285771	0	0	g15123
clu_6917_NA	scaffold99:434350-440813	0.428509	9.91e-14	0.965554	0.98258	0.960236	0.709425	0.549956	g27860
clu_6917_NA	scaffold99:434350-438957	0.211048	9.91e-14	0.00543912	0.00443468	0.0101171	0.100733	0.215427	g27860
clu_8301_NA	scaffold45289-1:946643-948915	0.58515	1.05e-13	0	0.0172106	0.114292	0.68036	0	g32522,g32523	gustatory receptor 108, lysosomal Pro-X carboxypeptidase-like
clu_5336_NA	scaffold11450:1386298-1390067	0.205166	1.12e-13	0.312048	0.10652	0.131067	0.143636	0.169583	g12755
clu_6805_NA	scaffold62235-1:166530-172565	0.565047	1.13e-13	0.0381121	0.0663083	0.0369767	0.604566	0.570698	g49806	amphiphysin, isoform B
clu_6805_NA	scaffold62235-1:166530-168260	0.325096	1.13e-13	0.566729	0.561618	0.545916	0.232267	0.250009	g49806	amphiphysin, isoform B
clu_6805_NA	scaffold62235-1:168532-172565	0.245472	1.13e-13	0.408281	0.390339	0.418687	0.172896	0.186298	g49806	amphiphysin, isoform B
clu_6033_NA	scaffold6852:2592187-2595473	0.978041	1.15e-13	0.980708	0	0	0.0516364	0.00266737	g36812
clu_6033_NA	scaffold6852:2594477-2595473	0.504128	1.15e-13	0.00969219	0	0	0.513801	0.502442	g36812
clu_6033_NA	scaffold6852:2592187-2594373	0.48531	1.15e-13	0.0096269	0	0	0.43544	0.49491	g36812
clu_10113_NA	scaffold3451-3:4156154-4170714	0.552799	1.3e-13	0	0.629701	0.772153	0.628668	0.219354	g15763	proline-rich protein 36-like isoform X6
clu_10113_NA	scaffold3451-3:4143419-4168479	0.207015	1.3e-13	0	9.2e-05	3.85e-05	0.00671545	0.207329	g15763	proline-rich protein 36-like isoform X6
clu_722_NA	scaffold11675:919701-928723	0.738445	1.58e-13	0.000107216	0.395185	0.6246	0.741345	0	g12127	leukocyte elastase inhibitor A-like isoform X1
clu_722_NA	scaffold11675:903271-928723	0.362168	1.58e-13	0.590357	0.59266	0.3754	0.258655	0	g12127	leukocyte elastase inhibitor A-like isoform X1
clu_722_NA	scaffold11675:909539-928723	0.268267	1.58e-13	0.276816	0.0384925	0.095048	0.0112059	0	g12127	leukocyte elastase inhibitor A-like isoform X1
clu_9807_NA	scaffold756-9:2004229-2005598	0.546154	1.58e-13	0.460415	0.980405	0.972213	0.960149	1	g44509	RecName: Full=1,2-dihydroxy-3-keto-5-methylthiopentene dioxygenase; AltName: Full=Acireductone dioxygenase (Fe(2+)-requiring); Short=ARD; Short=Fe-ARD
clu_9807_NA	scaffold756-9:2004229-2005230	0.309539	1.58e-13	0.309539	0.0098888	0.018612	4.05e-17	2.23e-07	g44509	RecName: Full=1,2-dihydroxy-3-keto-5-methylthiopentene dioxygenase; AltName: Full=Acireductone dioxygenase (Fe(2+)-requiring); Short=ARD; Short=Fe-ARD
clu_1954_NA	scaffold230009:32925-37770	0.240765	1.61e-13	0	0.00780386	0.0659337	0.249363	0.145481
clu_1954_NA	scaffold230009:22474-37770	0.215986	1.61e-13	0	0.269611	0.24606	0.0493391	0.0637274
clu_8385_NA	scaffold7477-4:2689793-2698532	0.793516	1.61e-13	0.203563	0.996606	0.984785	0.983519	0.877317	g39993	LOW QUALITY PROTEIN: phosphatidylinositol 4-kinase type 2-alpha-like
clu_8385_NA	scaffold7477-4:2689793-2762830	0.759023	1.61e-13	0.759023	0.00320236	0.0147211	0.015294	1.1e-79	g39993	LOW QUALITY PROTEIN: phosphatidylinositol 4-kinase type 2-alpha-like
clu_6602_NA	scaffold13533:140711-158398	0.293304	1.79e-13	0	0.437696	0.484876	0.180039	0.252003	g14236
clu_6602_NA	scaffold13533:134185-140280	0.256905	1.79e-13	0	0.515209	0.477672	0.327686	0.252368	g14236
clu_6602_NA	scaffold13533:134185-142140	0.230152	1.79e-13	0	7.78e-05	0.00432099	0.113972	0.230317	g14236
clu_11825_NA	scaffold12193:44594-51167	0.437917	2.01e-13	0.147571	0.582725	0.586931	0.427304	0.281997	g29968
clu_11825_NA	scaffold12193:49893-51167	0.254803	2.01e-13	0.279479	0.010339	0.0210307	0.0799187	0.170009	g29968
clu_11825_NA	scaffold12193:29528-51167	0.204067	2.01e-13	0.176031	0.119227	0.100477	0.238204	0.303426	g29968
clu_7060_NA	scaffold603759:26781-28862	0.728489	3.03e-13	0	0.977055	0.977735	0.478489	0.249246
clu_7060_NA	scaffold603759:28314-28862	0.359362	3.03e-13	0	0.000119997	3.75e-05	0.232709	0.362501
clu_7060_NA	scaffold603759:26781-28291	0.35095	3.03e-13	0	0.0001118	2.8e-05	0.238373	0.355007
clu_3075_NA	scaffold6954:1260884-1266657	0.237833	3.16e-13	0	0.00341003	0.0145932	0.151414	0.241523	g40868	PREDICTED: ephrin type-A receptor 4-B isoform X4
clu_2186_NA	scaffold12579-5:499351-502776	0.584064	3.19e-13	0.993936	0.868741	0.731286	0.409696	0.520526	g28178	E3 ubiquitin-protein ligase TRIM9-like isoform X2
clu_2186_NA	scaffold12579-5:502470-502776	0.31845	3.19e-13	0.00619199	0.065485	0.144181	0.325076	0.215164	g28178	E3 ubiquitin-protein ligase TRIM9-like isoform X2
clu_2186_NA	scaffold12579-5:499351-502429	0.266119	3.19e-13	9.37e-05	0.0724507	0.126738	0.266529	0.277297	g28178	E3 ubiquitin-protein ligase TRIM9-like isoform X2
clu_617_NA	scaffold5378:848325-861929	0.649856	3.44e-13	0.562466	0.0961152	0.222514	0.332217	0.750239	g23676	Na+/K+ ATPase alpha subunit
clu_617_NA	scaffold5378:848325-858217	0.474501	3.44e-13	0.291746	0.664637	0.567804	0.49224	0.186444	g23676	Na+/K+ ATPase alpha subunit
clu_7673_NA	scaffold3051:2082852-2127843	0.630793	3.69e-13	0	0.639698	0	0.119993	0.00890405	g18466	transforming acidic coiled-coil-containing protein 2-like isoform X2
clu_7673_NA	scaffold3051:2074557-2127843	0.526898	3.69e-13	0	0.655457	0	0.626347	0.847307	g18466	transforming acidic coiled-coil-containing protein 2-like isoform X2
clu_11121_NA	scaffold41-6:371820-385386	0.368778	3.85e-13	0.0671069	0.245404	0.19207	0.433481	0.156161	g26987
clu_7275_NA	scaffold7577-2:704702-727289	0.600411	3.91e-13	0.879118	0.334673	0.269659	0.36711	0.42983	g39297	GH16479p
clu_7275_NA	scaffold7577-2:704702-725696	0.29541	3.91e-13	0.0674142	0.28862	0.330867	0.277449	0.312579	g39297	GH16479p
clu_7275_NA	scaffold7577-2:726517-727289	0.290406	3.91e-13	0.294604	0.366116	0.385013	0.331171	0.350841	g39297	GH16479p
clu_6964_NA	scaffold3480:3151258-3155838	0.202703	4.07e-13	0.555127	0.506335	0.465056	0.410771	0.408228	g17254
clu_1247_NA	scaffold9612:206341-209530	0.332596	4.73e-13	0.973594	0.644698	0.878018	0.950004	0.981066	g1285
clu_1247_NA	scaffold9612:208367-209530	0.283462	4.73e-13	0.0290841	0.312278	0.109064	0.0502372	0.0237853	g1285
clu_9467_NA	scaffold13020:38870-41107	0.760132	5.07e-13	0	0.999971	0	0.239991	0.270929	g14733	inactive rhomboid protein 1-like isoform X3
clu_9467_NA	scaffold13020:39977-41107	0.397561	5.07e-13	0	2.6e-05	0	0.397689	0.375019	g14733	inactive rhomboid protein 1-like isoform X3
clu_9467_NA	scaffold13020:38870-39951	0.369842	5.07e-13	0	2.33e-05	0	0.362594	0.375919	g14733	inactive rhomboid protein 1-like isoform X3
clu_9485_NA	scaffold433891:1284-6873	0.441188	5.32e-13	0.522992	0.896198	0.884928	0.964661	0.963889
clu_9485_NA	scaffold433891:1411-6873	0.317144	5.32e-13	0.343259	0.077984	0.0816202	0.0285337	0.0270305
clu_8333_NA	scaffold233432:18995-23386	0.407431	5.33e-13	9.17e-05	9.97e-06	0.000379735	0.191217	0.407523
clu_8333_NA	scaffold233432:18495-23386	0.355155	5.33e-13	0.875872	0.907952	0.958903	0.89512	0.665222
clu_5125_NA	scaffold861722:765-1964	0.597163	5.7e-13	0	0	0	0.270737	0.867901
clu_5125_NA	scaffold861722:1083-1964	0.551162	5.7e-13	0	0	0	0.657709	0.106547
clu_3040_NA	scaffold53060:16365234-16367474	0.487623	5.7e-13	0	0	0	0.194667	0.682289	g30644	sarcoplasmic calcium-binding proteins II, V, VI, and VII isoform X2
clu_3040_NA	scaffold53060:16365663-16367474	0.47679	5.7e-13	0	0	0	0.758883	0.282093	g30644	sarcoplasmic calcium-binding proteins II, V, VI, and VII isoform X2
clu_7233_NA	scaffold9173:16443-21659	0.482922	6.35e-13	0	0.463444	0.27503	0.516866	0.0330558	g3006	sphingomyelin phosphodiesterase 1 precursor isoform 1
clu_7233_NA	scaffold9173:17313-21659	0.278486	6.35e-13	0	0.216862	0.352322	0.22353	0.495896	g3006	sphingomyelin phosphodiesterase 1 precursor isoform 1
clu_7233_NA	scaffold9173:16443-17185	0.211965	6.35e-13	0	0.321742	0.373735	0.260651	0.472616	g3006	sphingomyelin phosphodiesterase 1 precursor isoform 1
clu_1844_NA	scaffold828:4188-4431	0.462568	7.14e-13	0	0.635202	0.312378	0.172057	0.282554
clu_1844_NA	scaffold828:3853-4431	0.430762	7.14e-13	0	0.326438	0.657203	0.757253	0.574146
clu_9077_NA	scaffold5691:1256929-1265720	0.342691	7.41e-13	0	0	0	0.629989	0.97268	g19322
clu_7874_NA	scaffold39843:645517-678982	0.572367	7.47e-13	0.419196	0	0.991563	0.988574	0	g32054
clu_7874_NA	scaffold39843:645517-664473	0.358343	7.47e-13	0.363625	0	0.00528213	0.00707014	0	g32054
clu_5265_NA	scaffold2924-2:496215-505093	0.268991	8.26e-13	0	0.171117	0.395632	0.366584	0.124616	g17544
clu_8448_NA	scaffold306-6:150411-154238	0.270361	9.11e-13	1	0.998365	0.995496	0.836874	0.729653	g26077
clu_10286_NA	scaffold1285799:12184-15934	0.305499	1.02e-12	0.147378	0.416305	0.347178	0.448709	0.391902
clu_8509_NA	scaffold6240-1:644255-648902	0.630557	1.34e-12	0	0.281623	0.650225	0.787334	0.908803	g39029	trimethyllysine dioxygenase, putative, partial
clu_8509_NA	scaffold6240-1:648064-648902	0.327502	1.34e-12	0	0.378091	0.186907	0.12832	0.0688192	g39029	trimethyllysine dioxygenase, putative, partial
clu_8509_NA	scaffold6240-1:644255-647257	0.303055	1.34e-12	0	0.346886	0.167864	0.0989534	0.0438309	g39029	trimethyllysine dioxygenase, putative, partial
clu_55_NA	scaffold11979:184005-189612	0.382692	1.37e-12	0	0.502566	0.504034	0.634713	0.252058	g29584	Otopetrin-like b, isoform A
clu_55_NA	scaffold11979:184005-185471	0.211762	1.37e-12	0	0.264344	0.262591	0.189095	0.401008	g29584	Otopetrin-like b, isoform A
clu_8524_NA	scaffold2392:1581634-1596947	0.217983	1.51e-12	0	0.0384404	0.0931591	0.153342	0.256425	g8013
clu_1330_NA	scaffold40184:177365-179477	0.503717	1.53e-12	2.81e-06	0.00221727	0.00679604	0.133856	0.50395	g32135	FERM domain-containing protein 4A-like
clu_1330_NA	scaffold40184:177365-178460	0.267984	1.53e-12	0.504412	0.545489	0.513193	0.465702	0.265008	g32135	FERM domain-containing protein 4A-like
clu_1330_NA	scaffold40184:178564-179477	0.265093	1.53e-12	0.534283	0.465083	0.492886	0.429346	0.26118	g32135	FERM domain-containing protein 4A-like
clu_10310_NA	scaffold5680:3114445-3123318	0.48411	1.6e-12	0	0.188552	0.300017	0.633539	0.668911	g24434	ribosoaml protein S2, partial
clu_10310_NA	scaffold5680:3114445-3123105	0.450331	1.6e-12	0	0.63628	0.439556	0.245691	0.2045	g24434	ribosoaml protein S2, partial
clu_1582_NA	scaffold315:2617727-2622356	0.29629	1.81e-12	0	2.59e-07	0.0165413	0.00255981	0.296408	g26159
clu_4257_NA	scaffold13026-2:324752-367092	0.748421	2.27e-12	0.251588	0	0	1	1	g14787	Crystal structure of human Guanosine Monophosphate reductase 2 (GMPR2)
clu_4257_NA	scaffold13026-2:322949-367092	0.73464	2.27e-12	0.73464	0	0	4.12e-08	5.24e-08	g14787	Crystal structure of human Guanosine Monophosphate reductase 2 (GMPR2)
clu_9853_NA	scaffold2062:561579-565054	0.261528	2.4e-12	0.0412566	0.152535	0.141892	0.204356	0.30267	g7460	ribosome-binding protein 1-like isoform X2
clu_6490_NA	scaffold4287-3:152880-159172	0.722144	2.51e-12	0.722144	0.010083	2.49e-09	0	0	g20374	mitochondrial import inner membrane translocase subunit Tim29-like
clu_6490_NA	scaffold4287-3:155496-159172	0.633132	2.51e-12	0.26328	0.892093	0.891917	0	0	g20374	mitochondrial import inner membrane translocase subunit Tim29-like
clu_6046_NA	scaffold25573:509702-529274	0.517007	2.66e-12	0.581622	0	0.412169	0.297838	0.0675614	g34117	phosphorylase kinase gamma
clu_6046_NA	scaffold25573:509702-516998	0.460002	2.66e-12	0.0277927	0	0.287298	0.487794	0.399295	g34117	phosphorylase kinase gamma
clu_6046_NA	scaffold25573:517088-546141	0.43696	2.66e-12	0.0881213	0	0.0971248	0.171358	0.445324	g34117	phosphorylase kinase gamma
clu_6046_NA	scaffold25573:529364-546141	0.307786	2.66e-12	0.401771	0	0.277031	0.167941	0.093985	g34117	phosphorylase kinase gamma
clu_10250_NA	scaffold13298-1:28126-30236	0.590206	2.67e-12	0.981479	0.912817	0.704753	0.390884	0.637197	g15109	kidney mitochondrial carrier protein 1-like isoform X2
clu_10250_NA	scaffold13298-1:29015-30236	0.340208	2.67e-12	0.00982894	0.0491438	0.168508	0.349736	0.207908	g15109	kidney mitochondrial carrier protein 1-like isoform X2
clu_10250_NA	scaffold13298-1:28126-28844	0.249999	2.67e-12	0.0139754	0.043797	0.132222	0.262945	0.161817	g15109	kidney mitochondrial carrier protein 1-like isoform X2
clu_4547_NA	scaffold6869:2924953-2926171	0.990649	3.9e-12	0.00936558	0	1	1	0.999994	g36958	Stretchin-Mlck, isoform S
clu_4547_NA	scaffold6869:2925827-2926171	0.67667	3.9e-12	0.67667	0	8.58e-23	1.16e-10	4.18e-06	g36958	Stretchin-Mlck, isoform S
clu_4547_NA	scaffold6869:2925941-2926171	0.31399	3.9e-12	0.31399	0	3.98e-23	5.38e-11	1.94e-06	g36958	Stretchin-Mlck, isoform S
clu_2341_NA	scaffold21672-5:3022637-3025675	0.791992	4.27e-12	0	0.909941	0.260815	0.181156	0.157138	g33771	inactive tyrosine-protein kinase transmembrane receptor ROR1-like isoform X6
clu_2341_NA	scaffold21672-5:3022637-3063352	0.603201	4.27e-12	0	0.0926005	0.73548	0.476764	0.581008	g33771	inactive tyrosine-protein kinase transmembrane receptor ROR1-like isoform X6
clu_2341_NA	scaffold21672-5:3022637-3040802	0.343129	4.27e-12	0	1.94e-06	0.0482317	0.343982	0.309973	g33771	inactive tyrosine-protein kinase transmembrane receptor ROR1-like isoform X6
clu_2601_NA	scaffold9-8:4372644-4374679	0.436129	4.89e-12	0	0.997539	0.987366	0.664381	0.561387	g26453
clu_2601_NA	scaffold9-8:4372644-4374325	0.244471	4.89e-12	0	1.32e-05	0.012258	0.194103	0.244954	g26453
clu_5767_NA	scaffold281:11238656-11240323	0.484103	4.95e-12	0	0.480349	0.53316	0.0581928	0.0670454	g25838	GH12877p
clu_5767_NA	scaffold281:11238656-11239032	0.425864	4.95e-12	0	0.223371	0.172837	0.513743	0.600333	g25838	GH12877p
clu_5767_NA	scaffold281:11239153-11241089	0.22233	4.95e-12	0	0.155103	0.0927153	0.346587	0.227482	g25838	GH12877p
clu_2095_NA	scaffold7962:1398250-1402018	0.678318	5.04e-12	0.03259	0.615137	0.682559	0.710896	0	g35623	RE22456p
clu_2095_NA	scaffold7962:1398250-1399865	0.360494	5.04e-12	0.536521	0.202727	0.200044	0.150335	0	g35623	RE22456p
clu_2095_NA	scaffold7962:1399933-1402018	0.32559	5.04e-12	0.464359	0.185527	0.141414	0.166977	0	g35623	RE22456p
clu_7688_NA	scaffold3051:3016568-3026000	0.457373	5.79e-12	0.953739	0.973544	0.923274	0.548139	0.515064	g18477	syndapin, isoform B
clu_7688_NA	scaffold3051:3020598-3026000	0.314092	5.79e-12	0.0314447	0.0155484	0.052944	0.291705	0.332467	g18477	syndapin, isoform B
clu_11724_NA	scaffold7510:3735848-3741055	0.392831	6.47e-12	0	0.590466	0.969257	0.989145	0	g40128
clu_170_NA	scaffold1202-31:811608-814745	0.324318	6.47e-12	0.305924	0.120684	0.152451	0.39239	0.440374	g42258
clu_170_NA	scaffold1202-31:811623-814745	0.234963	6.47e-12	0.644756	0.646607	0.695788	0.532322	0.514432	g42258
clu_5453_NA	scaffold152710:11447-26162	0.478054	6.56e-12	0.973448	0.978562	1	0.604273	0.521959
clu_5453_NA	scaffold152710:11447-16747	0.282571	6.56e-12	0.0124653	0.00935852	7.68e-06	0.220418	0.28259
clu_5414_NA	scaffold9838-8:3866499-3870019	0.793804	6.86e-12	0	0.936262	0.978415	0.184518	0.258403	g1958	adaptor protein complex 1/2, beta subunit
clu_5414_NA	scaffold9838-8:3868268-3870019	0.412379	6.86e-12	0	0.0446505	0.000591967	0.418604	0.392171	g1958	adaptor protein complex 1/2, beta subunit
clu_5414_NA	scaffold9838-8:3866499-3868251	0.382618	6.86e-12	0	0.02004	0.0215722	0.409395	0.357596	g1958	adaptor protein complex 1/2, beta subunit
clu_11801_NA	scaffold24409-1:450451-451337	0.253123	7.48e-12	0.254294	0.00211749	0.000409027	0.0143081	0.0216329	g34036
clu_10748_NA	scaffold7795:996243-997781	0.550363	7.81e-12	0	0	0.976716	0.442067	0.426228	g39561	papilin isoform X1
clu_10748_NA	scaffold7795:997550-997781	0.301733	7.81e-12	0	0	0.0176131	0.252298	0.328685	g39561	papilin isoform X1
clu_10748_NA	scaffold7795:996243-997041	0.299755	7.81e-12	0	0	0.00597778	0.305944	0.254425	g39561	papilin isoform X1
clu_5557_NA	scaffold7601-1:1619314-1624158	0.636782	8.21e-12	0	0	0	0.98848	0.351698	g39331	megakaryocyte stimulating factor
clu_5557_NA	scaffold7601-1:1622562-1624158	0.421191	8.21e-12	0	0	0	9.95e-06	0.421201	g39331	megakaryocyte stimulating factor
clu_5557_NA	scaffold7601-1:1619314-1621877	0.215591	8.21e-12	0	0	0	0.0115097	0.227101	g39331	megakaryocyte stimulating factor
clu_10055_NA	scaffold8514-6:428537-446892	0.941124	8.82e-12	0.0227606	0.415049	0.883905	0.963884	0	g4155	proteoglycan 4 isoform X11
clu_10055_NA	scaffold8514-6:428537-440987	0.36584	8.82e-12	0.434075	0.273894	0.0596904	0.0361148	0	g4155	proteoglycan 4 isoform X11
clu_10055_NA	scaffold8514-6:441716-446892	0.317451	8.82e-12	0.349246	0.154397	0.0646494	0.00788835	0	g4155	proteoglycan 4 isoform X11
clu_10055_NA	scaffold8514-6:441331-441634	0.257833	8.82e-12	0.257833	0.137726	0.0367302	0.00793654	0	g4155	proteoglycan 4 isoform X11
clu_279_NA	scaffold2288-2:2442785-2443811	0.703475	9.51e-12	0	0.77957	0.760411	0.160686	0.0618128	g9285,g9288
clu_279_NA	scaffold2288-2:2401576-2403194	0.700488	9.51e-12	0	0.234871	0.251477	0.835625	0.935359	g9285,g9288
clu_80_NA	scaffold6837:1814535-1817647	0.914615	9.84e-12	2.87e-06	0	0	0	0.914618	g37685	spire, isoform E
clu_80_NA	scaffold6837:1815945-1817647	0.349599	9.84e-12	0.382235	0	0	0	0.0326361	g37685	spire, isoform E
clu_80_NA	scaffold6837:1815301-1815871	0.303471	9.84e-12	0.331801	0	0	0	0.02833	g37685	spire, isoform E
clu_80_NA	scaffold6837:1814535-1815230	0.261545	9.84e-12	0.285961	0	0	0	0.0244161	g37685	spire, isoform E
clu_1076_NA	scaffold8574-1:2306282-2323489	0.304537	9.89e-12	0	0.000314095	0	0.0907616	0.304852	g4304
clu_1076_NA	scaffold8574-1:2306018-2306180	0.27127	9.89e-12	0	0.103291	0	0.122053	0.374561	g4304
clu_1076_NA	scaffold8574-1:2313102-2323000	0.245299	9.89e-12	0	0.282847	0	0.164418	0.0375478	g4304
clu_8159_NA	scaffold9039-1:174311-180751	0.489017	1.02e-11	0.511005	1	0.999996	0.99999	0
clu_8159_NA	scaffold9039-1:174311-187112	0.253393	1.02e-11	0.253395	1.96e-07	1.98e-06	5.41e-06	0
clu_7460_NA	scaffold2317:262691-269705	0.613732	1.03e-11	1	0.733014	0.919437	0.412149	0.386205	g9576	IP04501p
clu_7460_NA	scaffold2317:262691-266140	0.331959	1.03e-11	1.76e-05	0.107225	0.0805627	0.288	0.332522	g9576	IP04501p
clu_7460_NA	scaffold2317:266178-269705	0.30173	1.03e-11	4.56e-05	0.161853	0.0680347	0.301935	0.293031	g9576	IP04501p
clu_5289_NA	scaffold145641:11032-14279	0.223139	1.04e-11	0.942896	0.815327	0.71884	0.766208	0.748454
clu_3135_NA	scaffold55-2:5596222-5598265	0.316353	1.07e-11	0	0.556607	0.505311	0.329826	0.538491	g27361
clu_3135_NA	scaffold55-2:5596222-5597159	0.242076	1.07e-11	0	6.49e-07	0.0262716	0.242077	0.0274183	g27361
clu_3135_NA	scaffold55-2:5597247-5598829	0.221312	1.07e-11	0	0.0895565	0.00541176	0.231675	0.03662	g27361
clu_11939_NA	scaffold3599:1111263-1125008	0.691443	1.09e-11	0.0501934	0.740639	0.478341	0.291685	0	g16643,g16644	eukaryotic translation initiation factor 4E member 2 variant, partial
clu_11939_NA	scaffold3599:1066141-1125008	0.515683	1.09e-11	0.599207	0.134748	0.400385	0.635072	0	g16643,g16644	eukaryotic translation initiation factor 4E member 2 variant, partial
clu_11939_NA	scaffold3599:1080677-1125008	0.303286	1.09e-11	0.408783	0.141261	0.20046	0.152715	0	g16643,g16644	eukaryotic translation initiation factor 4E member 2 variant, partial
clu_7204_NA	scaffold145347:2290-14382	0.445226	1.11e-11	0	0.955028	0.794452	0.509465	0.704459
clu_7204_NA	scaffold145347:10530-14382	0.27201	1.11e-11	0	0.0226886	0.141395	0.299217	0.190381
clu_845_NA	scaffold6239-16:134454-206494	0.220899	1.16e-11	1.86e-05	0.166377	0.220914	0.200048	0.178367
clu_845_NA	scaffold6239-16:134454-228241	0.218562	1.16e-11	1	0.861235	0.770204	0.78441	0.781438
clu_11887_NA	scaffold5089:777203-807731	0.215905	1.18e-11	0	0.975813	0.96672	0.792658	0.759984
clu_101_NA	scaffold12070:56293-59013	0.473097	1.27e-11	0.998434	0.998832	0.999162	0.978161	0.526065	g29771	solute carrier family 37 (glycerol-3-phosphate transporter), member 2, isoform CRA_a, partial
clu_101_NA	scaffold12070:56293-57013	0.242171	1.27e-11	4.63e-06	0.00113438	0.000809062	0.012682	0.242175	g29771	solute carrier family 37 (glycerol-3-phosphate transporter), member 2, isoform CRA_a, partial
clu_101_NA	scaffold12070:57066-59013	0.23174	1.27e-11	0.00156138	3.35e-05	2.89e-05	0.00915719	0.232004	g29771	solute carrier family 37 (glycerol-3-phosphate transporter), member 2, isoform CRA_a, partial
clu_2965_NA	scaffold12245:118251-123660	0.335164	1.3e-11	0.990552	0.877458	0.934435	0.655388	0.947129	g30022
clu_2413_NA	scaffold8000:95756-122298	0.806694	1.41e-11	0.158943	0.649654	0.669543	0.829285	0.965139	g35797	putative rho guanine nucleotide exchange factor 12 isoform X3
clu_2413_NA	scaffold8000:107549-122298	0.404112	1.41e-11	0.434302	0.191469	0.169145	0.0936481	0.0193847	g35797	putative rho guanine nucleotide exchange factor 12 isoform X3
clu_2413_NA	scaffold8000:95756-107484	0.402582	1.41e-11	0.41998	0.171387	0.164569	0.0827222	0.018119	g35797	putative rho guanine nucleotide exchange factor 12 isoform X3
clu_7236_NA	scaffold7738:127686-198215	0.325154	1.46e-11	0.925925	0.948015	0.945101	0.838372	0.659745	g39509
clu_7236_NA	scaffold7738:139387-198215	0.290839	1.46e-11	0.0491025	0.0286546	0.0346801	0.140436	0.321102	g39509
clu_7471_NA	scaffold1080860:4026-5824	0.25993	1.58e-11	0.509724	0	0	0	0.249794
clu_7471_NA	scaffold1080860:4891-5824	0.219862	1.58e-11	0.00452724	0	0	0	0.224389
clu_7471_NA	scaffold1080860:930-5824	0.20967	1.58e-11	0.00260855	0	0	0	0.212279
clu_4130_NA	scaffold2681:148193-158918	0.26853	1.58e-11	0	0.171372	0.330128	0.184088	0.439902	g10648
clu_4130_NA	scaffold2681:148193-151720	0.204412	1.58e-11	0	0.518741	0.401438	0.466299	0.310296	g10648
clu_7124_NA	scaffold78-1452:770751-774776	0.447709	1.91e-11	0.225465	0.172884	0.243208	0.439467	0.633622	g27691
clu_7124_NA	scaffold78-1452:770751-774667	0.402691	1.91e-11	0.457125	0.418872	0.226085	0.0588685	0.0958822	g27691
clu_7124_NA	scaffold78-1452:770751-774770	0.29139	1.91e-11	0.192017	0.270994	0.45869	0.487073	0.307354	g27691
clu_7566_NA	scaffold8364:1113086-1119414	0.580106	1.91e-11	0	0.932061	0.964771	0.699058	0.498707
clu_3924_NA	scaffold332-1:278587-293061	0.313051	1.91e-11	0	0	0.34318	0.0502046	0.0395519	g26309
clu_7566_NA	scaffold8364:1113086-1115623	0.297768	1.91e-11	0	0.000278114	0.00121219	0.0514919	0.298046
clu_7791_NA	scaffold5808-38:1510103-1534698	0.261165	1.96e-11	0.490198	0.404932	0.332773	0.228323	0.234831	g19674
clu_10780_NA	scaffold278-5:727306-776428	0.20952	2.12e-11	0.170432	0.231578	0.124699	0.0712374	0.0193956	g25753
clu_371_NA	scaffold2266-1:11755605-11804688	0.57696	2.33e-11	0.957323	0.97258	0.919996	0.760084	0.383491	g8858	MIP15662p, partial
clu_371_NA	scaffold2266-1:11757631-11804688	0.318238	2.33e-11	0.0426772	0.0274203	0.0426961	0.0235009	0.336492	g8858	MIP15662p, partial
clu_10291_NA	scaffold5414:124784-133090	0.206152	2.51e-11	0.865104	0.815102	0.777991	0.658102	0.694153	g23907	RNA-binding protein cabeza-like isoform X2
clu_7400_NA	scaffold60966:854495-857452	0.282311	2.54e-11	1	0.99481	0.996734	0.887248	0.717721	g31035
clu_8449_NA	scaffold306-6:154358-166263	0.245702	2.57e-11	0	0.99759	0.997767	0.856626	0.751916	g26077
clu_6164_NA	scaffold1195-2:15156-15455	0.955923	2.57e-11	0.0241876	0.00191091	0.0195859	0.687255	0.957827	g42168	LOW QUALITY PROTEIN: alpha-actinin, sarcomeric-like
clu_6164_NA	scaffold1195-2:15156-16546	0.955923	2.57e-11	0.976372	0.998096	0.981038	0.313017	0.0422553	g42168	LOW QUALITY PROTEIN: alpha-actinin, sarcomeric-like
clu_3584_NA	scaffold787-3:619506-621747	0.329456	2.57e-11	0	0	0.342464	0	0.0130073	g43981	chitin deacetylase-like 5, isoform B
clu_10202_NA	scaffold17496-3:113893-122554	0.396549	2.78e-11	0.0056853	0.0324596	0.0269133	0.402235	0.385334	g33092
clu_10202_NA	scaffold17496-3:113893-116658	0.235911	2.78e-11	0.538782	0.494378	0.501339	0.329057	0.28816	g33092
clu_6165_NA	scaffold1195-2:15540-17106	0.941625	2.81e-11	0.00311253	0.00222181	0.00143134	0.625003	0.943055	g42168	LOW QUALITY PROTEIN: alpha-actinin, sarcomeric-like
clu_6165_NA	scaffold1195-2:16628-17106	0.941625	2.81e-11	0.99694	0.997782	0.99857	0.375531	0.057484	g42168	LOW QUALITY PROTEIN: alpha-actinin, sarcomeric-like
clu_7816_NA	scaffold3878-28:1021298-1022104	0.977527	2.89e-11	0.0224737	0	0	0.999998	1	g13337	klingon
clu_7816_NA	scaffold3878-28:1021298-1021892	0.588351	2.89e-11	0.588352	0	0	1.14e-06	4.19e-13	g13337	klingon
clu_7816_NA	scaffold3878-28:1021298-1021972	0.389184	2.89e-11	0.389184	0	0	7.55e-07	2.77e-13	g13337	klingon
clu_4657_NA	scaffold10240-1:113040-127148	0.684929	3.11e-11	0.182745	0.876685	0.795217	0	0
clu_4657_NA	scaffold10240-1:113040-128800	0.66286	3.11e-11	0.666938	0.00826986	4.45e-05	0	0
clu_5555_NA	scaffold7601-1:1606145-1611737	0.435908	3.2e-11	0.0173018	0	0	0.45321	0.22721	g39331	megakaryocyte stimulating factor
clu_5555_NA	scaffold7601-1:1603740-1611737	0.433314	3.2e-11	0.558296	0	0	0.122603	0.140385	g39331	megakaryocyte stimulating factor
clu_11488_NA	scaffold34117:906666-916625	0.346825	3.24e-11	0.426294	0.254858	0.276696	0.489874	0.601828	g31408	kinesin light chain-like isoform X1
clu_11488_NA	scaffold34117:906666-910001	0.203468	3.24e-11	0.343201	0.437144	0.423097	0.290482	0.239071	g31408	kinesin light chain-like isoform X1
clu_10671_NA	scaffold8900:136248-155123	0.230625	3.61e-11	0.843799	0.70634	0.639647	0.792393	0.610315	g2772
clu_5907_NA	scaffold1180:1090949-1097073	0.26414	4.03e-11	0.736099	0.998254	0.995292	0.9921	0.996596	g43205
clu_5907_NA	scaffold1180:1090949-1161676	0.264064	4.03e-11	0.26408	0.00179167	0.000403922	5.64e-15	4.02e-08	g43205
clu_5785_NA	scaffold302:169527-170898	0.68607	4.1e-11	0	0.0581272	0.0861506	0.742347	0.714613	g25935	beta-glucuronidase-like isoform X2
clu_5785_NA	scaffold302:167734-170898	0.484374	4.1e-11	0	0.633406	0.610266	0.194249	0.0815888	g25935	beta-glucuronidase-like isoform X2
clu_5785_NA	scaffold302:166959-170898	0.225595	4.1e-11	0	0.377448	0.357698	0.0858088	0.209416	g25935	beta-glucuronidase-like isoform X2
clu_2343_NA	scaffold214-1:519410-522879	0.333348	4.15e-11	0	0.999999	0.991312	0.667019	0.718041	g24826	Na+/K+ ATPase alpha subunit
clu_1234_NA	scaffold1157:247500-252599	0.453482	4.16e-11	0	0	0.894534	0.486193	0.939272	g42980	putative host cell factor 1-like
clu_1234_NA	scaffold1157:247500-251557	0.228974	4.16e-11	0	0	0.0740383	0.259782	0.032694	g42980	putative host cell factor 1-like
clu_1234_NA	scaffold1157:251610-252599	0.224507	4.16e-11	0	0	0.0336188	0.256684	0.0302063	g42980	putative host cell factor 1-like
clu_11934_NA	scaffold3599:794715-819834	0.337211	4.57e-11	0.66282	1	0.999999	1	1	g16638
clu_2490_NA	scaffold672-9:1853962-1862437	0.361359	4.82e-11	0.511722	0.453443	0.580162	0.814348	0.796522	g45195
clu_2490_NA	scaffold672-9:1853962-1862377	0.207578	4.82e-11	0.301108	0.287228	0.257517	0.127931	0.139463	g45195
clu_7133_NA	scaffold78-1452:4229990-4250676	0.462571	4.96e-11	0.946813	0	0	0.616514	0.484242	g27710	retinal degeneration A, isoform B
clu_7133_NA	scaffold78-1452:4250013-4250676	0.237272	4.96e-11	0.0229162	0	0	0.157193	0.260155	g27710	retinal degeneration A, isoform B
clu_8247_NA	scaffold7942-2:2704754-2720366	0.607831	5.04e-11	0.738784	0.171525	0.221938	0.128682	0	g36718	exportin-7-like isoform X5
clu_8247_NA	scaffold7942-2:2704754-2708106	0.404789	5.04e-11	0.175473	0.579345	0.560247	0.491844	0	g36718	exportin-7-like isoform X5
clu_8247_NA	scaffold7942-2:2708144-2720366	0.292736	5.04e-11	0.0901462	0.254947	0.220768	0.383973	0	g36718	exportin-7-like isoform X5
clu_5976_NA	scaffold6884:254240-274074	0.377329	5.17e-11	0.999997	0.999998	0.999997	0.699228	0.622739	g37232
clu_5976_NA	scaffold6884:254240-269721	0.209092	5.17e-11	1.56e-05	2.28e-06	1.27e-05	0.160965	0.209093	g37232
clu_8332_NA	scaffold233432:16476-18373	0.342511	5.23e-11	1	1	0.999762	0.888516	0.657538
clu_8332_NA	scaffold233432:16476-18873	0.342511	5.23e-11	1.55e-07	1.11e-07	0.000238928	0.111548	0.342511
clu_9969_NA	scaffold4473:809950-816267	0.32453	5.24e-11	0	0.152056	0.250123	0.474912	0.332497	g21419
clu_9969_NA	scaffold4473:809976-816267	0.234283	5.24e-11	0	0.600113	0.609261	0.433542	0.660636	g21419
clu_618_NA	scaffold5378:869310-872782	0.519341	5.8e-11	0	0.986529	0.86018	0.543192	0.581202	g23676	Na+/K+ ATPase alpha subunit
clu_618_NA	scaffold5378:869310-874288	0.235005	5.8e-11	0	0.000267317	0.143013	0.192666	0.236847	g23676	Na+/K+ ATPase alpha subunit
clu_618_NA	scaffold5378:869310-871958	0.229932	5.8e-11	0	0.01822	9.57e-05	0.230028	0.143844	g23676	Na+/K+ ATPase alpha subunit
clu_5426_NA	scaffold2063:104779-117030	0.289929	5.95e-11	0.599109	0.624002	0.717527	0.72017	0.432036	g7461
clu_1497_NA	scaffold3435-7:2825451-2826652	0.692415	5.97e-11	0.445117	0.783509	0.553798	0.090337	0.23034	g15573	aminolevulinate synthase
clu_1497_NA	scaffold3435-7:2825451-2826092	0.379092	5.97e-11	0.285566	0.12029	0.226762	0.502092	0.381144	g15573	aminolevulinate synthase
clu_6479_NA	scaffold8100:100243-114844	0.553373	6.05e-11	0	0.841312	0.653838	0.288298	0.320242	g35988	polychaetoid, isoform I
clu_6479_NA	scaffold8100:100243-113572	0.302039	6.05e-11	0	0.0758067	0.169038	0.377845	0.361196	g35988	polychaetoid, isoform I
clu_6479_NA	scaffold8100:113637-114844	0.251334	6.05e-11	0	0.0830899	0.180747	0.334215	0.318882	g35988	polychaetoid, isoform I
clu_10003_NA	scaffold6848-2:754778-760637	0.303822	6.12e-11	0.00918883	0.121247	0.234699	0.312663	0.20278	g36785
clu_118_NA	scaffold12533-2:45689-58193	0.433896	6.33e-11	0.991158	0.741957	0.673429	0.55791	0	g28061
clu_118_NA	scaffold12533-2:45689-47771	0.221553	6.33e-11	0.00979147	0.155657	0.14898	0.231257	0	g28061
clu_118_NA	scaffold12533-2:47908-58193	0.212343	6.33e-11	2.72e-06	0.13427	0.178679	0.212555	0	g28061
clu_1434_NA	scaffold154350:328-2115	0.701093	6.45e-11	0	0	0	0.714025	0.0129316
clu_1434_NA	scaffold154350:328-2949	0.701093	6.45e-11	0	0	0	0.285975	0.987068
clu_2228_NA	scaffold2399-4:75403-149601	0.268133	6.48e-11	0.959783	0.940515	0.829791	0.736634	0.681888	g8177
clu_4755_NA	scaffold11127:58474-64588	0.612049	6.56e-11	0	0.685546	0.454409	0.228643	0.0625143	g10858	putative protein Daple-like isoform X4
clu_4755_NA	scaffold11127:58474-60363	0.361697	6.56e-11	0	0.169554	0.298667	0.419465	0.531289	g10858	putative protein Daple-like isoform X4
clu_4755_NA	scaffold11127:60590-64588	0.206939	6.56e-11	0	0.127851	0.23044	0.270844	0.334605	g10858	putative protein Daple-like isoform X4
clu_11588_NA	scaffold9172:5563-9400	0.496241	6.78e-11	0	0.999999	1	0.799823	0.503777	g3001	laminin subunit alpha-like isoform X6
clu_11588_NA	scaffold9172:5563-7581	0.284064	6.78e-11	0	5.41e-06	4.56e-07	0.113325	0.284143	g3001	laminin subunit alpha-like isoform X6
clu_11588_NA	scaffold9172:7610-9400	0.212181	6.78e-11	0	1.06e-06	4.84e-07	0.0868605	0.212183	g3001	laminin subunit alpha-like isoform X6
clu_2092_NA	scaffold7962:1372029-1376485	0.661084	6.81e-11	0	0.993085	0.961445	0.325393	0	g35622	myomegalin-like isoform X2
clu_2092_NA	scaffold7962:1374972-1376485	0.348194	6.81e-11	0	0.00676484	0.0144341	0.35565	0	g35622	myomegalin-like isoform X2
clu_2092_NA	scaffold7962:1372029-1374955	0.312891	6.81e-11	0	0.0069149	0.0403783	0.320373	0	g35622	myomegalin-like isoform X2
clu_2514_NA	scaffold8391-118:523604-534038	0.666608	8.42e-11	0.999997	0.999999	0.999987	0.406001	0.333459	g3981	L-threonine ammonia-lyase-like isoform X3
clu_2514_NA	scaffold8391-118:531879-534038	0.435782	8.42e-11	3.17e-06	3.06e-06	2.27e-05	0.324703	0.435784	g3981	L-threonine ammonia-lyase-like isoform X3
clu_2514_NA	scaffold8391-118:523604-531664	0.230886	8.42e-11	1.68e-06	3.1e-06	2.3e-05	0.204443	0.230886	g3981	L-threonine ammonia-lyase-like isoform X3
clu_6662_NA	scaffold272:141653-162447	0.627865	8.48e-11	0.0280771	0.613567	0.650301	0.65458	0.305869	g25583	glutamate dehydrogenase, mitochondrial-like isoform X8
clu_6662_NA	scaffold272:154451-162447	0.583729	8.48e-11	0.923155	0.346983	0.314271	0.334156	0.670868	g25583	glutamate dehydrogenase, mitochondrial-like isoform X8
clu_2688_NA	scaffold14427-2:2580033-2622804	0.745308	9.02e-11	0	1.82e-06	1.46e-05	0.345708	0.750223	g35424	cheerio, isoform I
clu_2688_NA	scaffold14427-2:2580033-2660156	0.745308	9.02e-11	0	1	1	0.643608	0.254708	g35424	cheerio, isoform I
clu_5001_NA	scaffold11021-4:439612-447344	0.60799	9.16e-11	0.796046	0.953243	0	0	0.339882	g11814	Hermansky-Pudlak syndrome 3 protein-like
clu_5001_NA	scaffold11021-4:443289-447344	0.298789	9.16e-11	0.0911394	0.0113769	0	0	0.309718	g11814	Hermansky-Pudlak syndrome 3 protein-like
clu_5001_NA	scaffold11021-4:439612-443212	0.258844	9.16e-11	0.0552647	0.00909701	0	0	0.267941	g11814	Hermansky-Pudlak syndrome 3 protein-like
clu_4382_NA	scaffold6331-2:1708116-1713241	0.38948	9.76e-11	0.999997	0.997782	0.999999	0.932449	0.615973	g37875
clu_4382_NA	scaffold6331-2:1711314-1713241	0.243834	9.76e-11	2.36e-05	0.00224858	8.97e-07	0.0451033	0.243973	g37875
clu_52_NA	scaffold1229250:22260-24164	0.499225	1.01e-10	0.483996	0.336799	0.507815	0.670416	0.836027
clu_52_NA	scaffold1229250:22298-24164	0.499225	1.01e-10	0.520564	0.663937	0.492885	0.329897	0.164713
clu_11590_NA	scaffold9172:68350-70791	0.772469	1.06e-10	0	0.278457	0.160255	0.933062	0	g3005	laminin subunit alpha-like isoform X8
clu_11590_NA	scaffold9172:68350-69425	0.396269	1.06e-10	0	0.39845	0.43078	0.0369644	0	g3005	laminin subunit alpha-like isoform X8
clu_11590_NA	scaffold9172:69466-70791	0.3762	1.06e-10	0	0.326842	0.412565	0.0327641	0	g3005	laminin subunit alpha-like isoform X8
clu_4428_NA	scaffold11141:353645-380864	0.324929	1.06e-10	0	0	0	0.0186728	0.343601	g10873
clu_4268_NA	scaffold6880-7:611035-670176	0.490525	1.16e-10	0.281455	0	0.054611	0.377806	0.556447	g37140	phospholipid scramblase 1-like isoform X1
clu_4268_NA	scaffold6880-7:664149-670176	0.387028	1.16e-10	0.715501	0	0.768474	0.554752	0.377831	g37140	phospholipid scramblase 1-like isoform X1
clu_5264_NA	scaffold6822-7:54795-62078	0.730938	1.19e-10	0.730941	2.96e-06	0	0	0
clu_5264_NA	scaffold6822-7:54795-60584	0.502877	1.19e-10	0.269055	0.771932	0	0	0
clu_9569_NA	scaffold6317:175850-185910	0.503575	1.27e-10	0.683578	0.258394	0.318071	0.179142	0.274795	g37831	kinesin-like protein KIF2A
clu_9569_NA	scaffold6317:177913-185910	0.242506	1.27e-10	0.186529	0.422083	0.403375	0.428769	0.314214	g37831	kinesin-like protein KIF2A
clu_9569_NA	scaffold6317:175850-177674	0.221499	1.27e-10	0.0961259	0.152857	0.137292	0.238511	0.316676	g37831	kinesin-like protein KIF2A
clu_6452_NA	scaffold3451-1:7911376-7913436	0.699173	1.27e-10	0	0.942132	0.514547	0.316348	0.242959	g15686
clu_6452_NA	scaffold3451-1:7911376-7912523	0.461524	1.27e-10	0	0.0684612	0.458934	0.466287	0.514273	g15686
clu_6452_NA	scaffold3451-1:7912599-7913436	0.237649	1.27e-10	0	0.0456342	0.079598	0.22054	0.244739	g15686
clu_9822_NA	scaffold756-9:3930774-3932010	0.438511	1.33e-10	0.744283	0.695689	0.600231	0.408225	0.383323	g44541
clu_9822_NA	scaffold756-9:3930774-3932919	0.317603	1.33e-10	0.00918424	0.0233025	0.00761741	0.323573	0.254175	g44541
clu_5482_NA	scaffold71507:101795-172094	0.779752	1.34e-10	0.924911	0.999427	0.96469	0.396895	0.258134	g49330	adenylyl cyclase-associated protein 1 isoform b
clu_5482_NA	scaffold71507:101795-112204	0.698985	1.34e-10	1.93e-05	2.66e-05	0.0334609	0.573892	0.699012	g49330	adenylyl cyclase-associated protein 1 isoform b
clu_6665_NA	scaffold272:217052-223809	0.251312	1.36e-10	0.0143761	0.00208716	0.0125894	0.127496	0.255779	g25583	glutamate dehydrogenase, mitochondrial-like isoform X8
clu_6665_NA	scaffold272:217052-224344	0.251312	1.36e-10	0.981976	0.998399	0.987619	0.873541	0.747184	g25583	glutamate dehydrogenase, mitochondrial-like isoform X8
clu_1235_NA	scaffold1157:269734-307742	0.782905	1.38e-10	0	0	0.856732	0.245205	0.0699403
clu_1235_NA	scaffold1157:269734-317478	0.579152	1.38e-10	0	0	0.0499021	0.414975	0.631697
clu_1235_NA	scaffold1157:269734-270070	0.242502	1.38e-10	0	0	0.0995557	0.342188	0.301005
clu_7263_NA	scaffold18555-1:133639-215874	0.884257	1.41e-10	0.0598515	0.856108	0	0.944109	0	g33307	myoneurin-like
clu_7263_NA	scaffold18555-1:138538-215874	0.594657	1.41e-10	0.632243	0.143892	0	0.0572108	0	g33307	myoneurin-like
clu_7263_NA	scaffold18555-1:149357-215874	0.226328	1.41e-10	0.250463	0.0422346	0	0.0143054	0	g33307	myoneurin-like
clu_761_NA	scaffold4492-20:9529255-9537298	0.949801	1.72e-10	0.956811	0	0.00701021	0	0	g21630	SET and MYND domain-containing protein 4-like
clu_761_NA	scaffold4492-20:9529255-9534481	0.94016	1.72e-10	0.005173	0	0.945333	0	0	g21630	SET and MYND domain-containing protein 4-like
clu_6571_NA	scaffold10209-7:826618-830028	0.412576	1.72e-10	0.564238	0.17944	0.147788	0.229323	0.211819	g854
clu_6571_NA	scaffold10209-7:826618-836290	0.27284	1.72e-10	0.124699	0.374826	0.397686	0.281612	0.261647	g854
clu_5560_NA	scaffold7601-1:1733911-1763380	0.371108	1.84e-10	0.000251238	0.37237	0.166013	0.0868618	0	g39333
clu_5560_NA	scaffold7601-1:1733911-1743128	0.316254	1.84e-10	0.827826	0.54443	0.735513	0.863636	0	g39333
clu_408_NA	scaffold13340:41896-50286	0.289242	1.93e-10	0.289242	0.0171308	0.00498108	0.00362942	0.00372249	g15164
clu_2571_NA	scaffold1173837:3031-7684	0.223582	2.16e-10	0.0978774	0.32174	0.287219	0.315584	0.271246
clu_6477_NA	scaffold8100:85727-89410	0.356005	2.19e-10	7.69e-06	0.0284424	0.0385435	0.194553	0.356198	g35988	polychaetoid, isoform I
clu_6477_NA	scaffold8100:85727-88122	0.215334	2.19e-10	0.63987	0.592813	0.552429	0.480309	0.389523	g35988	polychaetoid, isoform I
clu_3925_NA	scaffold332-1:367476-368814	0.574073	2.32e-10	0.590157	0	0	0.0162261	0.275889	g26311	lactate dehydrogenase, isoform B
clu_3925_NA	scaffold332-1:367476-369407	0.574073	2.32e-10	0.411368	0	0	0.983916	0.734452	g26311	lactate dehydrogenase, isoform B
clu_4377_NA	scaffold6331-2:1319571-1327692	0.301742	2.36e-10	0.999984	0.990228	0.994097	0.81617	0.698233	g37867	multiple pdz domain protein, putative
clu_8788_NA	scaffold5764-3:3014094-3019468	0.544926	2.36e-10	1	0.989111	0.828829	0.455336	0.633737	g19572	set1/Ash2 histone methyltransferase complex subunit ASH2-like
clu_8788_NA	scaffold5764-3:3014094-3019498	0.544926	2.36e-10	7.82e-09	0.0110452	0.172754	0.544944	0.36764	g19572	set1/Ash2 histone methyltransferase complex subunit ASH2-like
clu_9851_NA	scaffold2062:539016-542124	0.259654	2.37e-10	0.000846455	0.00115957	0.0109997	0.260625	0.163019	g7459
clu_9851_NA	scaffold2062:539016-551255	0.259654	2.37e-10	0.999236	0.998878	0.989118	0.739525	0.837385	g7459
clu_10533_NA	scaffold7220-2:29387-32557	0.657854	2.42e-10	0	0	0	0.134558	0.792413	g40528	muscle LIM protein at 84B, isoform C
clu_10533_NA	scaffold7220-2:29505-32557	0.609837	2.42e-10	0	0	0	0.802273	0.192436	g40528	muscle LIM protein at 84B, isoform C
clu_5975_NA	scaffold6884:234540-253098	0.337874	2.6e-10	0.871127	0.706803	0.793882	0.537812	0.624348	g37232
clu_5975_NA	scaffold6884:234540-241467	0.250742	2.6e-10	0.11941	0.00013039	0.000345882	0.251088	0.182575	g37232
clu_1299_NA	scaffold152368:10510-12442	0.248335	2.68e-10	1.36e-05	0.0262005	0.0182674	0.184661	0.260062
clu_6775_NA	scaffold827:24436-100550	0.207755	2.82e-10	0	0.471097	0.402044	0.322683	0.262533
clu_9918_NA	scaffold13307-1:104276-106158	0.666891	3.26e-10	0.948923	0.567676	0.446725	0.282032	0.448944	g15125	SCAR, isoform A
clu_9918_NA	scaffold13307-1:104276-105791	0.353447	3.26e-10	0.0262918	0.228153	0.280698	0.379095	0.276932	g15125	SCAR, isoform A
clu_9918_NA	scaffold13307-1:105820-106158	0.313444	3.26e-10	0.0275118	0.208978	0.278524	0.344997	0.290935	g15125	SCAR, isoform A
clu_12004_NA	scaffold1225:301062-312605	0.255185	3.26e-10	0.717515	0	0.598497	0.454885	0	g42556
clu_12004_NA	scaffold1225:303581-312605	0.232897	3.26e-10	6.79e-05	0	0.045044	0.232965	0	g42556
clu_7815_NA	scaffold3878-28:1014243-1020284	0.471309	3.37e-10	1.47e-08	0	0	0.086792	0.471364	g13337	klingon
clu_7815_NA	scaffold3878-28:1019239-1020284	0.471309	3.37e-10	1	0	0	0.91325	0.528691	g13337	klingon
clu_4815_NA	scaffold12031-2:269866-281058	0.327513	3.91e-10	0.92788	0.847955	0.600367	0.663451	0.830401	g29654
clu_12114_NA	scaffold3443:436355-441225	0.274647	4.51e-10	0	0	1	0.725352	0.958835	g15602
clu_6399_NA	scaffold7309:1991998-1997330	0.371096	4.54e-10	0	0.553567	0.720614	0.732934	0.924536	g39671
clu_5450_NA	scaffold50-4:758878-802389	0.607861	4.89e-10	0.0912117	0.712145	0.652721	0.365268	0.289294	g27273,g27272	unconventional myosin-Va
clu_5450_NA	scaffold50-4:800019-802389	0.323166	4.89e-10	0.508027	0.13904	0.184861	0.33609	0.363875	g27273,g27272	unconventional myosin-Va
clu_5450_NA	scaffold50-4:758878-799978	0.283933	4.89e-10	0.449123	0.11737	0.167488	0.304279	0.231015	g27273,g27272	unconventional myosin-Va
clu_12191_NA	scaffold3719:2823968-2833700	0.551746	5.05e-10	0.238786	0.106172	0.0796423	0.132528	0.606612	g14068	tropomyosin isoforms c/e isoform X14
clu_12191_NA	scaffold3719:2826259-2827338	0.329982	5.05e-10	0.439874	0.236971	0.254333	0.398466	0.149556	g14068	tropomyosin isoforms c/e isoform X14
clu_12191_NA	scaffold3719:2823968-2827338	0.234375	5.05e-10	0.291933	0.360648	0.332746	0.127658	0.0882515	g14068	tropomyosin isoforms c/e isoform X14
clu_12191_NA	scaffold3719:2827470-2833700	0.22042	5.05e-10	0.161374	0.381794	0.363282	0.187554	0.103624	g14068	tropomyosin isoforms c/e isoform X14
clu_3005_NA	scaffold53060:4863530-4866224	0.798521	5.09e-10	0	1	0.999999	0	0.201654	g30510	chloride channel-a, isoform D
clu_3005_NA	scaffold53060:4864485-4866224	0.401827	5.09e-10	0	4e-08	8.33e-07	0	0.401828	g30510	chloride channel-a, isoform D
clu_3005_NA	scaffold53060:4863530-4864447	0.396694	5.09e-10	0	3.88e-08	5.59e-07	0	0.396695	g30510	chloride channel-a, isoform D
clu_2564_NA	scaffold173127:213-898	0.256054	5.23e-10	0.459211	0.229232	0.221994	0.229112	0.266794
clu_2564_NA	scaffold173127:669-898	0.214642	5.23e-10	0.0384105	0.25084	0.247267	0.244294	0.18178
clu_3076_NA	scaffold6954:1268915-1275098	0.486017	5.32e-10	0	0.846116	0.901026	0.489339	0.415013	g40868	PREDICTED: ephrin type-A receptor 4-B isoform X4
clu_3076_NA	scaffold6954:1272799-1275098	0.317736	5.32e-10	0	0.079686	0.0504961	0.30606	0.367944	g40868	PREDICTED: ephrin type-A receptor 4-B isoform X4
clu_1108_NA	scaffold1746-11:248547-277235	0.419535	5.46e-10	0	0	0.605367	0.27736	0.185666	g46259,g46258
clu_3783_NA	scaffold2417-1:271971-273959	0.431856	5.56e-10	0.0594786	0.41158	0.417975	0.481891	0.131728	g8215,g8216
clu_2896_NA	scaffold11594:82125-102686	0.381413	5.56e-10	0	0.498038	0.313799	0.181854	0.113255	g13026
clu_3783_NA	scaffold2417-1:280135-282600	0.329775	5.56e-10	0.654877	0.415582	0.466332	0.393149	0.722816	g8215,g8216
clu_2896_NA	scaffold11594:95807-102686	0.233511	5.56e-10	0	0.149481	0.258322	0.322848	0.382993	g13026
clu_4133_NA	scaffold758671:6913-10617	0.297377	5.67e-10	0.999996	0.995461	0.996314	0.731704	0.703147
clu_1654_NA	scaffold12104:8241914-8318459	0.486137	6.09e-10	0.486324	0	0	0	0.000186877	g29873	receptor expression enhancing protein A, isoform I
clu_1654_NA	scaffold12104:8248479-8315913	0.382302	6.09e-10	0.000181825	0	0	0	0.382484	g29873	receptor expression enhancing protein A, isoform I
clu_1654_NA	scaffold12104:8241914-8315913	0.242028	6.09e-10	0.495194	0	0	0	0.253166	g29873	receptor expression enhancing protein A, isoform I
clu_1654_NA	scaffold12104:8241914-8243619	0.2298	6.09e-10	0.0100385	0	0	0	0.239838	g29873	receptor expression enhancing protein A, isoform I
clu_2619_NA	scaffold233701:1792-20338	0.224104	6.09e-10	0	1	0.99638	0.841685	0.775982
clu_11161_NA	scaffold7853:136321-137712	0.734522	6.56e-10	0	0	0.0553826	0.789904	0	g36514	beta-glucuronidase-like isoform X1
clu_11161_NA	scaffold7853:134529-137712	0.411493	6.56e-10	0	0	0.529193	0.1177	0	g36514	beta-glucuronidase-like isoform X1
clu_11161_NA	scaffold7853:133754-137712	0.323028	6.56e-10	0	0	0.415424	0.092396	0	g36514	beta-glucuronidase-like isoform X1
clu_5342_NA	scaffold3002-1:456120-474217	0.275434	6.7e-10	0.999991	0.999998	0.999197	0.724566	0.75344	g19188
clu_4375_NA	scaffold6331-2:1302165-1310857	0.476662	6.84e-10	0.999999	0.999989	0.999958	0.971804	0.52407	g37866	predicted protein
clu_4375_NA	scaffold6331-2:1302165-1306335	0.27401	6.84e-10	6.34e-07	5.66e-06	2.13e-05	0.0181747	0.27401	g37866	predicted protein
clu_4375_NA	scaffold6331-2:1306355-1310857	0.202652	6.84e-10	5.91e-07	5.14e-06	2.05e-05	0.010021	0.203684	g37866	predicted protein
clu_3570_NA	scaffold43009:521-1698	0.409064	6.99e-10	0	0.680027	0.799685	0.420417	0.390616	g32328
clu_3570_NA	scaffold43009:1043-1698	0.215207	6.99e-10	0	0.13647	0.0790573	0.282313	0.294123	g32328
clu_4822_NA	scaffold12031-2:1203374-1216172	0.423672	7.32e-10	0.841028	0.914316	0.622346	0.490644	0	g29670
clu_4822_NA	scaffold12031-2:1203374-1208495	0.236279	7.32e-10	0.095775	0.0469728	0.208728	0.283396	0	g29670
clu_11758_NA	scaffold4204-74:1515032-1518231	0.636878	7.82e-10	0.015675	0	0	0.652553	0	g13511	Central Fibronectin-III array of RIM-binding protein
clu_11758_NA	scaffold4204-74:1517863-1518231	0.339914	7.82e-10	0.525353	0	0	0.185439	0	g13511	Central Fibronectin-III array of RIM-binding protein
clu_11758_NA	scaffold4204-74:1515032-1517768	0.296964	7.82e-10	0.458972	0	0	0.162008	0	g13511	Central Fibronectin-III array of RIM-binding protein
clu_3182_NA	scaffold11874-1:575288-576826	0.542136	7.86e-10	0	0	0.974439	0.432862	0.484396	g12479	extracellular matrix protein papilin 3
clu_3182_NA	scaffold11874-1:575288-576086	0.292055	7.86e-10	0	0	0.0101263	0.294223	0.302181	g12479	extracellular matrix protein papilin 3
clu_3182_NA	scaffold11874-1:576595-576826	0.257937	7.86e-10	0	0	0.0155524	0.273474	0.213522	g12479	extracellular matrix protein papilin 3
clu_8578_NA	scaffold19-1:1390060-1391870	0.606021	7.9e-10	0.0938049	0.701231	0.635247	0.192134	0.296993	g26592	adenosine deaminase, isoform CRA_a, partial
clu_8578_NA	scaffold19-1:1390060-1391152	0.329887	7.9e-10	0.49756	0.163432	0.196247	0.416676	0.379809	g26592	adenosine deaminase, isoform CRA_a, partial
clu_8578_NA	scaffold19-1:1391258-1391870	0.276134	7.9e-10	0.420034	0.142285	0.180135	0.392473	0.347239	g26592	adenosine deaminase, isoform CRA_a, partial
clu_5425_NA	scaffold2063:94137-98870	0.283562	9.44e-10	0.111931	0.36847	0.392342	0.354457	0.18319	g7461
clu_5425_NA	scaffold2063:98914-99675	0.271623	9.44e-10	0.860218	0.613103	0.592123	0.633545	0.76711	g7461
clu_8267_NA	scaffold366-1:588709-661551	0.673167	9.52e-10	0	0.983719	0	0.787365	0.386261	g28589	receptor expression enhancing protein A, isoform I
clu_8267_NA	scaffold366-1:588709-654987	0.441405	9.52e-10	0	0.00815241	0	0.0518057	0.449516	g28589	receptor expression enhancing protein A, isoform I
clu_4372_NA	scaffold6331-2:1127106-1141337	0.368351	9.52e-10	0	1	1	0.957916	0.631742	g37865
clu_8267_NA	scaffold366-1:659846-661551	0.206122	9.52e-10	0	0.000212338	0	0.230883	0.206334	g28589	receptor expression enhancing protein A, isoform I
clu_8584_NA	scaffold929102:704-14838	0.433703	9.78e-10	0.0304782	0.22105	0.199265	0.433306	0.464237
clu_8584_NA	scaffold929102:704-4947	0.221028	9.78e-10	0.500451	0.369907	0.390373	0.286222	0.273068
clu_8584_NA	scaffold929102:4976-14838	0.212676	9.78e-10	0.480026	0.409221	0.412973	0.290585	0.268065
clu_999_NA	scaffold350459:13722-15958	0.256875	9.78e-10	3e-06	0	0.0311912	0.259439	0.22585
clu_999_NA	scaffold350459:15541-15958	0.253706	9.78e-10	0.625464	0	0.5233	0.41186	0.372076
clu_11597_NA	scaffold9864:640932-642970	0.404807	9.96e-10	0.949243	0.543878	0.565323	0.640479	0.780815	g2175
clu_11597_NA	scaffold9864:641170-642970	0.396215	9.96e-10	0.0514955	0.450396	0.421977	0.361495	0.220212	g2175
clu_1500_NA	scaffold3435-7:2852755-2855690	0.281814	1.02e-09	0	1	1	0.718822	0.892813	g15573	aminolevulinate synthase
clu_2398_NA	scaffold151719:39037-52334	0.326791	1.03e-09	0	0.00235492	0.025489	0.218715	0.329105
clu_2398_NA	scaffold151719:39037-53235	0.326791	1.03e-09	0	0.997686	0.974651	0.781518	0.670896
clu_2636_NA	scaffold21672-1:77221-78840	0.309949	1.05e-09	0.366005	0	0	0.0560559	0	g33667
clu_9122_NA	scaffold867:2309179-2320640	0.293845	1.06e-09	0	0.248278	0.20552	0.499811	0.489549	g44153
clu_5131_NA	scaffold221945:4396-11133	0.277231	1.2e-09	0	0.616679	0.660474	0.383163	0.468527
clu_7978_NA	scaffold794879:15298-19747	0.286843	1.23e-09	0.333212	0.227354	0	0.132162	0.0901608
clu_7978_NA	scaffold794879:11949-20150	0.276466	1.23e-09	0.000222178	0.0251317	0	0.167615	0.278086
clu_7978_NA	scaffold794879:11949-15168	0.234202	1.23e-09	0.539198	0.334333	0	0.384362	0.304609
clu_7978_NA	scaffold794879:11949-19747	0.221243	1.23e-09	0.0260902	0.244106	0	0.173222	0.218567
clu_4724_NA	scaffold167070:4447-8014	0.254646	1.23e-09	0.836747	0.606603	0.64755	0.657136	0
clu_4427_NA	scaffold11141:348746-353513	0.221258	1.3e-09	0	0	0	0.28465	0.0633923	g10873
clu_1439_NA	scaffold11649:495535-495703	0.357183	1.41e-09	5.25e-07	9.46e-08	8.96e-09	0.0241197	0.357183	g13108
clu_1439_NA	scaffold11649:495535-496389	0.357183	1.41e-09	1	1	1	0.977016	0.644883	g13108
clu_2179_NA	scaffold5698:430815-431439	0.265559	1.75e-09	0.826101	0.970334	0.896661	0.848669	0.704467	g19457
clu_2179_NA	scaffold5698:431227-431439	0.265559	1.75e-09	0.176368	0.030537	0.104649	0.152126	0.297149	g19457
clu_5783_NA	scaffold302:162659-164903	0.444317	1.76e-09	0	0.579596	0.521472	0.19506	0.135028	g25935	beta-glucuronidase-like isoform X2
clu_5783_NA	scaffold302:159581-164903	0.330562	1.76e-09	0	0.23783	0.349784	0.50381	0.567797	g25935	beta-glucuronidase-like isoform X2
clu_10401_NA	scaffold3374:245770-250992	0.347782	1.79e-09	0.29955	0.52338	0.583021	0.647332	0.450833
clu_328_NA	scaffold2266-1:1828303-1830605	0.845658	1.8e-09	0.108909	0.863352	0.950515	0.779748	0.430321
clu_174_NA	scaffold14:163895-164129	0.481852	1.8e-09	0.998798	0.728622	0.539238	0.849178	0.516937
clu_174_NA	scaffold14:163895-167735	0.481852	1.8e-09	0.00122955	0.274056	0.461731	0.151343	0.483284
clu_328_NA	scaffold2266-1:1830339-1830605	0.479058	1.8e-09	0.53322	0.0806953	0.0280329	0.101636	0.133904
clu_328_NA	scaffold2266-1:1828303-1830136	0.3666	1.8e-09	0.388052	0.050615	0.03752	0.0676074	0.070281
clu_328_NA	scaffold2266-1:1828608-1830605	0.238916	1.8e-09	0.0379282	0.0676741	0.071773	0.0777428	0.238941
clu_11755_NA	scaffold4204-74:1465362-1475980	0.892588	1.9e-09	0.979992	0	0	0.244375	0.0874039	g13511	Central Fibronectin-III array of RIM-binding protein
clu_11755_NA	scaffold4204-74:1465362-1469819	0.484399	1.9e-09	0.0196934	0	0	0.504092	0.486082	g13511	Central Fibronectin-III array of RIM-binding protein
clu_11755_NA	scaffold4204-74:1470355-1475980	0.287366	1.9e-09	0.00037783	0	0	0.251533	0.288241	g13511	Central Fibronectin-III array of RIM-binding protein
clu_8086_NA	scaffold12203:63961-71716	0.393261	1.97e-09	0	0	0.980037	0.816287	0.586776	g29982	karst, isoform B
clu_1440_NA	scaffold11649:496524-496913	0.295736	2.12e-09	1	1	0.997777	0.983547	0.704304	g13108
clu_1440_NA	scaffold11649:496581-496913	0.295736	2.12e-09	4.61e-08	6.03e-07	0.00228937	0.0165037	0.295755	g13108
clu_10975_NA	scaffold4421:2521527-2573614	0.810505	2.13e-09	0	0	0	0.972703	0.162198
clu_10975_NA	scaffold4421:2513672-2521528	0.462503	2.13e-09	0	0	0	3.11e-06	0.462506
clu_9680_NA	scaffold78-1426:2784041-2790895	0.305903	2.32e-09	0	0	0.327206	0	0.021303	g27623
clu_9680_NA	scaffold78-1426:2784041-2786918	0.251811	2.32e-09	0	0	0.147523	0	0.399334	g27623
clu_5279_NA	scaffold11975:36465-41160	0.875346	2.41e-09	0.0676826	0.255066	0.55199	0.882202	0.945588	g29565	eukaryotic translation initiation factor 4E-like isoform X1
clu_5279_NA	scaffold11975:32639-41160	0.732432	2.41e-09	0.896998	0.724428	0.433369	0.114177	0.0527724	g29565	eukaryotic translation initiation factor 4E-like isoform X1
clu_7095_NA	scaffold180:238505-242980	0.327024	2.51e-09	0	0	0	0.422112	0.0950885	g24636
clu_7095_NA	scaffold180:238505-240415	0.27159	2.51e-09	0	0	0	0.0267593	0.298349	g24636
clu_2558_NA	scaffold106936:13753-22891	0.33537	2.52e-09	0.965193	0.913454	0	0.907809	0.632325
clu_11641_NA	scaffold444110:30059-31325	0.329643	2.52e-09	0.9787	0.735171	0.747271	0.788218	0.648935
clu_11641_NA	scaffold444110:30059-30605	0.211056	2.52e-09	0.0134118	0.165587	0.150336	0.150126	0.223883
clu_3338_NA	scaffold3790-12:1676376-1690661	0.678058	2.74e-09	0.0143847	0.528267	0.685747	0	0	g13172	putative sodium-coupled neutral amino acid transporter 7
clu_3338_NA	scaffold3790-12:1684874-1690661	0.678058	2.74e-09	0.994552	0.449944	0.316494	0	0	g13172	putative sodium-coupled neutral amino acid transporter 7
clu_12009_NA	scaffold1225:855521-870685	0.262966	2.8e-09	0.996443	0.948346	0.958145	0.857486	0.733927	g42567
clu_4927_NA	scaffold10230:403746-430802	0.324981	2.82e-09	0	0.940772	0.913647	0.60352	0
clu_4927_NA	scaffold10230:392101-393063	0.30852	2.82e-09	0	0.000185972	0.0288326	0.315681	0
clu_9817_NA	scaffold756-9:3092053-3095961	0.280913	2.88e-09	0	0.0395189	0.0644212	0.318496	0.251344	g44524
clu_8464_NA	scaffold45467:36796-47329	0.385997	2.9e-09	0.985647	0.992127	0.996451	0.603656	0	g32539
clu_11434_NA	scaffold1629:930308-962773	0.534923	2.93e-09	0.318757	0.357902	0.535452	0.69841	0.854564	g41566	proteoglycan 4 isoform X3
clu_1640_NA	scaffold12104:3626975-3627925	0.474351	2.93e-09	0	0	0.0113597	0.484878	0.0604819	g29833	RE28143p1
clu_11434_NA	scaffold1629:946363-962773	0.457782	2.93e-09	0.627411	0.668803	0.432766	0.282059	0.129582	g41566	proteoglycan 4 isoform X3
clu_1640_NA	scaffold12104:3627984-3631193	0.325553	2.93e-09	0	0	0.679089	0.512214	0.619628	g29833	RE28143p1
clu_11617_NA	scaffold12623:646796-667820	0.310437	3.03e-09	0	0	0.267384	0.469291	0.158903	g28232
clu_5372_NA	scaffold964-2:12036-39326	0.306499	3.05e-09	0.163395	0.396485	0.431852	0.388845	0.469894	g43558
clu_5372_NA	scaffold964-2:11126-11942	0.272468	3.05e-09	0.743721	0.60393	0.568619	0.61191	0.532852	g43558
clu_8255_NA	scaffold7942-2:4997870-5005294	0.900285	3.05e-09	0.997291	0	0.0970052	0	0	g36749	high affinity copper uptake protein 1-like isoform X3
clu_8255_NA	scaffold7942-2:5003386-5005294	0.463035	3.05e-09	0.00191978	0	0.464955	0	0	g36749	high affinity copper uptake protein 1-like isoform X3
clu_8255_NA	scaffold7942-2:4964965-5005294	0.362047	3.05e-09	1.85e-05	0	0.362066	0	0	g36749	high affinity copper uptake protein 1-like isoform X3
clu_6475_NA	scaffold8100:63365-81900	0.357703	3.06e-09	0.739052	0.769932	0.744303	0.449098	0.411874	g35988	polychaetoid, isoform I
clu_6475_NA	scaffold8100:75209-81900	0.218883	3.06e-09	0.165243	0.116898	0.0602674	0.239399	0.279721	g35988	polychaetoid, isoform I
clu_2342_NA	scaffold214-1:516350-519316	0.545279	3.07e-09	0	0.994924	0	0.513375	0.491157	g24826	Na+/K+ ATPase alpha subunit
clu_2342_NA	scaffold214-1:516350-522510	0.211094	3.07e-09	0	4.58e-05	0	0.173403	0.227729	g24826	Na+/K+ ATPase alpha subunit
clu_11138_NA	scaffold1612:89638-100439	0.249974	3.22e-09	0.0930503	0.20784	0.102963	0.318735	0.338244	g41507
clu_700_NA	scaffold31043:16122445-16124342	0.241544	3.47e-09	0.880067	0.828439	0.748973	0.877567	0.972381	g34647
clu_1955_NA	scaffold149883:5532-11984	0.440015	3.54e-09	0.113854	0.218579	0.239889	0.554843	0
clu_1955_NA	scaffold149883:5532-13139	0.402403	3.54e-09	0.829313	0.682722	0.627005	0.407995	0
clu_9318_NA	scaffold903438:3071-9412	0.259934	3.7e-09	0	0.471551	0.493402	0.735302	0.635177
clu_347_NA	scaffold2266-1:8035708-8037941	0.453696	3.75e-09	0.784752	1	0.990203	0.897005	0.546284	g8803	pleckstrin homology-like domain family B member 1 isoform X2
clu_347_NA	scaffold2266-1:8036545-8037941	0.248031	3.75e-09	0.143537	8.97e-06	0.0105659	0.103013	0.249648	g8803	pleckstrin homology-like domain family B member 1 isoform X2
clu_347_NA	scaffold2266-1:8035708-8036465	0.205801	3.75e-09	0.0932215	1.1e-05	0.00372607	0.0476031	0.208796	g8803	pleckstrin homology-like domain family B member 1 isoform X2
clu_5981_NA	scaffold6884:520912-542397	0.317214	3.75e-09	0.481369	0.798293	0.711307	0.604818	0.514285	g37237
clu_3674_NA	scaffold17496-1:163064-172082	0.282969	4.14e-09	0.00183891	0.284496	0.280282	0.210027	0.103636	g33040
clu_3674_NA	scaffold17496-1:166224-172082	0.223051	4.14e-09	0.533914	0.191408	0.20334	0.287083	0.313155	g33040
clu_11232_NA	scaffold46-1:78866-86678	0.249917	4.16e-09	0.0336364	0.0689938	0.209895	0.167413	0.284391	g27076	lethal (1) G0289, isoform B
clu_3740_NA	scaffold2254:676842-692622	0.630753	4.28e-09	0	4.33e-06	0.0191569	0.153688	0.63138	g6721	zinc finger protein 226-like
clu_3740_NA	scaffold2254:730667-739657	0.225983	4.28e-09	0	0.372054	0.284204	0.252809	0.120694	g6721	zinc finger protein 226-like
clu_7959_NA	scaffold1772:841460-851303	0.835261	4.32e-09	0	0	0.980936	0.252824	0.145675	g45472	adenosine deaminase 2-A-like
clu_7959_NA	scaffold1772:841460-867826	0.815875	4.32e-09	0	0	0.00846521	0.721701	0.824606	g45472	adenosine deaminase 2-A-like
clu_4720_NA	scaffold248:1817518-1827796	0.230828	4.36e-09	0	0.0298363	0	0.260665	0	g25337
clu_4720_NA	scaffold248:1817518-1823271	0.212929	4.36e-09	0	0.243255	0	0.0303259	0	g25337
clu_2589_NA	scaffold508:2234748-2235903	0.227727	4.54e-09	0	0.0531415	0.125858	0.279188	0.243967	g29048
clu_5524_NA	scaffold558:277555-296453	0.213307	4.54e-09	0	0.995362	0.989714	0.781816	0.846716	g29521
clu_4588_NA	scaffold998:199642-200697	0.21511	5.21e-09	0.572689	0.476894	0.476773	0.421702	0.35737	g43730
clu_4588_NA	scaffold998:198101-200697	0.201399	5.21e-09	0.016685	0.0771335	0.0813896	0.186159	0.218084	g43730
clu_240_NA	scaffold5697-1:4041366-4041606	0.377391	5.59e-09	0	0	0	0.458724	0.0813335
clu_5384_NA	scaffold53562:7987747-7989987	0.434084	6.47e-09	0	0	0	0.212373	0.646458	g30722
clu_5384_NA	scaffold53562:7987747-7989558	0.38667	6.47e-09	0	0	0	0.701466	0.314796	g30722
clu_8457_NA	scaffold310765:2930-5934	0.245953	6.57e-09	0	0.992486	0.999234	0.987995	0.75331
clu_8457_NA	scaffold310765:5073-5934	0.245953	6.57e-09	0	0.00753041	0.000773178	0.0121245	0.246731
clu_4062_NA	scaffold9842:1296210-1299800	0.3395	7.2e-09	0	0.595598	0.695932	0.882652	0.938335	g2007
clu_4062_NA	scaffold9842:1296210-1299680	0.259537	7.2e-09	0	0.318326	0.239971	0.123346	0.0650936	g2007
clu_2085_NA	scaffold979-4:561002-583802	0.228619	7.33e-09	0	0.963819	0.994868	0.958512	0.76729	g43634
clu_4897_NA	scaffold201421:718-2902	0.455662	7.44e-09	0.292183	0.232717	0.396739	0.615819	0.687399
clu_4897_NA	scaffold201421:2125-2902	0.260788	7.44e-09	0.448603	0.440727	0.340287	0.231197	0.190901
clu_2590_NA	scaffold508:2236232-2236542	0.363905	8.6e-09	0	0.631002	0.476317	0.261428	0.332414	g29048
clu_2590_NA	scaffold508:2236217-2236542	0.226031	8.6e-09	0	0.195061	0.29828	0.421498	0.367555	g29048
clu_2039_NA	scaffold8366-2:3537148-3541245	0.370696	9.05e-09	0.011834	0.0374681	0.109684	0.385727	0.105859	g3884
clu_10392_NA	scaffold3374:61776-73933	0.551194	9.88e-09	1.11e-05	0.0357034	0	0.551205	0	g15342	sarcolemmal membrane-associated protein isoform r
clu_10392_NA	scaffold3374:61776-66403	0.450315	9.88e-09	0.895284	0.673272	0	0.366657	0	g15342	sarcolemmal membrane-associated protein isoform r
clu_10392_NA	scaffold3374:67028-73933	0.222012	9.88e-09	0.183017	0.326728	0	0.14615	0	g15342	sarcolemmal membrane-associated protein isoform r
clu_169_NA	scaffold1202-31:799456-810351	0.289481	1.04e-08	0.0592818	0.0887284	0.135657	0.348724	0.323813	g42258
clu_169_NA	scaffold1202-31:799513-810351	0.289481	1.04e-08	0.941302	0.911929	0.864576	0.651329	0.67631	g42258
clu_4875_NA	scaffold1145-4:11975525-11987017	0.380393	1.09e-08	0	0.999998	1	0.747733	0.619613	g42744
clu_4875_NA	scaffold1145-4:11980183-11987017	0.20551	1.09e-08	0	1.13e-06	1e-05	0.143976	0.205873	g42744
clu_2178_NA	scaffold5698:430329-430741	0.257236	1.12e-08	0.860904	0.974304	0.896726	0.842491	0.717418	g19457
clu_2178_NA	scaffold5698:430329-431132	0.257236	1.12e-08	0.141128	0.0257901	0.105139	0.15972	0.28321	g19457
clu_11498_NA	scaffold3032-1:180951-190528	0.564957	1.13e-08	0.0604312	0.0242773	0.0505253	0.515299	0.590224	g18328	DIS3-like exonuclease 2 isoform X7
clu_11498_NA	scaffold3032-1:184838-190528	0.560892	1.13e-08	0.924477	0.975951	0.949483	0.484804	0.40781	g18328	DIS3-like exonuclease 2 isoform X7
clu_9815_NA	scaffold756-9:3074198-3082314	0.420776	1.14e-08	0	0	0.615803	0.193453	0.288153	g44524
clu_9815_NA	scaffold756-9:3077276-3082314	0.231972	1.14e-08	0	0	0.206434	0.450906	0.43245	g44524
clu_7068_NA	scaffold214-4:345754-345955	0.587497	1.24e-08	0.215586	0.591084	0.43039	0.569797	0.800045	g24882,g24883	heat shock protein 90
clu_7068_NA	scaffold214-4:355750-356421	0.587497	1.24e-08	0.795204	0.412051	0.569744	0.434148	0.202359	g24882,g24883	heat shock protein 90
clu_877_NA	scaffold6239-16:5818907-5821155	0.402866	1.24e-08	0	0.767045	0.912327	0.859366	0.51021	g38862	transmembrane protein 114
clu_877_NA	scaffold6239-16:5820532-5821155	0.402866	1.24e-08	0	0.233072	0.0876955	0.140977	0.490539	g38862	transmembrane protein 114
clu_8344_NA	scaffold14427-1:3859396-3893773	0.283551	1.26e-08	0.00874431	0.28603	0.284446	0.29212	0	g35380
clu_1346_NA	scaffold51281:15877-33351	0.647967	1.3e-08	0.154592	0.323928	0.39601	0.647561	0.800152	g30355	peregrin-like isoform X12
clu_1346_NA	scaffold51281:15877-19788	0.331433	1.3e-08	0.450687	0.360546	0.32235	0.186537	0.105269	g30355	peregrin-like isoform X12
clu_1346_NA	scaffold51281:19847-33351	0.316533	1.3e-08	0.415288	0.320105	0.286421	0.173054	0.114778	g30355	peregrin-like isoform X12
clu_5448_NA	scaffold50-4:676597-689515	0.537418	1.37e-08	0.680335	0.677195	0.672884	0.283113	0.139867	g27270	unconventional myosin-Va
clu_1195_NA	scaffold46-16:1603205-1603827	0.44441	1.37e-08	0	0.305605	0.156475	0.151735	0.597633	g27171
clu_1195_NA	scaffold46-16:1603205-1605452	0.44441	1.37e-08	0	0.695355	0.844271	0.848906	0.403855	g27171
clu_5448_NA	scaffold50-4:676597-681370	0.311984	1.37e-08	0.192416	0.135551	0.102275	0.303675	0.41351	g27270	unconventional myosin-Va
clu_5448_NA	scaffold50-4:681516-689515	0.311432	1.37e-08	0.138053	0.194922	0.226288	0.418719	0.449271	g27270	unconventional myosin-Va
clu_7754_NA	scaffold151144:6153-8150	0.23529	1.38e-08	0.907112	0.870324	0.859866	0.757184	0.670708	g48824
clu_7754_NA	scaffold151144:6153-8312	0.23529	1.38e-08	0.0946613	0.129897	0.140876	0.242856	0.329524	g48824
clu_11453_NA	scaffold3538:1959219-1961295	0.317582	1.47e-08	0	0	1	0.682418	0.768618	g16519
clu_11453_NA	scaffold3538:1959849-1961295	0.317582	1.47e-08	0	0	6.63e-08	0.317628	0.23139	g16519
clu_8984_NA	scaffold4164-1:409176-466679	0.464849	1.59e-08	0.99773	0.782342	0.804136	0.532813	0.709572	g13438	EH domain-containing protein 1-like isoform X2
clu_8984_NA	scaffold4164-1:380304-466679	0.464849	1.59e-08	0.00233899	0.227914	0.196328	0.4675	0.293529	g13438	EH domain-containing protein 1-like isoform X2
clu_11136_NA	scaffold1612:42974-75964	0.460455	1.65e-08	3.83e-05	0.317009	0.279014	0.315221	0.460455	g41506	glycerophosphocholine phosphodiesterase GPCPD1 isoform X1
clu_11136_NA	scaffold1612:69476-75964	0.460455	1.65e-08	1	0.632369	0.664103	0.684779	0.539545	g41506	glycerophosphocholine phosphodiesterase GPCPD1 isoform X1
clu_7677_NA	scaffold3051:2409179-2413434	0.275561	1.65e-08	1	0.999994	0.999995	0.875055	0.724504	g18469
clu_11951_NA	scaffold636164:2641-14586	0.286442	1.66e-08	0.548384	0.525081	0.490439	0.444862	0.343264
clu_9426_NA	scaffold3418:1019488-1028506	0.736641	1.77e-08	0.000743542	0.490017	0.39584	0.736655	0.61149	g15471	leukocyte elastase inhibitor A-like isoform X1
clu_9426_NA	scaffold3418:1002926-1028506	0.42698	1.77e-08	0.579629	0.512965	0.563483	0.285456	0.293307	g15471	leukocyte elastase inhibitor A-like isoform X1
clu_9426_NA	scaffold3418:1009321-1028506	0.274253	1.77e-08	0.287366	0.014696	0.0444986	0.0662151	0.108709	g15471	leukocyte elastase inhibitor A-like isoform X1
clu_11942_NA	scaffold3599:1219896-1224029	0.298052	1.78e-08	0	4.38e-10	0	0.0111588	0.298052	g16646
clu_11942_NA	scaffold3599:1219896-1233654	0.298052	1.78e-08	0	1	0	0.988841	0.704121	g16646
clu_7490_NA	scaffold8324:4727066-4793060	0.543883	1.84e-08	0	0	0.786412	0.332331	0.199569	g3579,g3578	vegetative cell wall protein gp1-like, reticulon-1-A-like
clu_7490_NA	scaffold8324:4758231-4793060	0.373451	1.84e-08	0	0	0.0143025	0.1522	0.387728	g3579,g3578	vegetative cell wall protein gp1-like, reticulon-1-A-like
clu_7490_NA	scaffold8324:4727066-4747003	0.293255	1.84e-08	0	0	0.000396908	0.299909	0.0603045	g3579,g3578	vegetative cell wall protein gp1-like, reticulon-1-A-like
clu_7490_NA	scaffold8324:4727066-4758196	0.253031	1.84e-08	0	0	0.129816	0.195828	0.382378	g3579,g3578	vegetative cell wall protein gp1-like, reticulon-1-A-like
clu_6730_NA	scaffold59886:440059-448526	0.658621	1.92e-08	0	0	4.07e-06	0	0.658625	g30957	sarco/endoplasmic reticulum-type Ca-2+-ATPase
clu_6730_NA	scaffold59886:440059-446304	0.42271	1.92e-08	0	0	0.553237	0	0.130528	g30957	sarco/endoplasmic reticulum-type Ca-2+-ATPase
clu_6730_NA	scaffold59886:446368-448255	0.295218	1.92e-08	0	0	0.386378	0	0.0911597	g30957	sarco/endoplasmic reticulum-type Ca-2+-ATPase
clu_5942_NA	scaffold304316:7585-8963	0.211175	1.93e-08	0	0.999996	0.999999	0.801571	0.788826
clu_7658_NA	scaffold1220146:3265-7765	0.610505	2.06e-08	0	0	0.103418	0.483142	0.713922
clu_7658_NA	scaffold1220146:3705-7765	0.307921	2.06e-08	0	0	0.45221	0.238371	0.144289
clu_7658_NA	scaffold1220146:3696-7765	0.302584	2.06e-08	0	0	0.486326	0.312065	0.15608
clu_3912_NA	scaffold5386:7340874-7359927	0.204342	2.15e-08	0.980688	0.884791	0.877245	0.776324	0.811944	g23747
clu_7524_NA	scaffold5883-1:1630916-1638831	0.802442	2.42e-08	0.826588	0.0241461	0	0	0	g19855
clu_7524_NA	scaffold5883-1:1634214-1638831	0.354547	2.42e-08	0.117249	0.471795	0	0	0	g19855
clu_7524_NA	scaffold5883-1:1634788-1638831	0.238298	2.42e-08	0.0232202	0.261518	0	0	0	g19855
clu_6963_NA	scaffold3480:3135836-3148892	0.333748	2.5e-08	0	0.147082	0.111156	0.364206	0.443527	g17254
clu_9440_NA	scaffold2415:688629-703818	0.555375	2.53e-08	0	0.283787	0.207119	0.511763	0.759521
clu_9440_NA	scaffold2415:685448-703818	0.497977	2.53e-08	0	0.624913	0.729598	0.39703	0.215625
clu_3734_NA	scaffold2254:44114-46913	0.529448	2.61e-08	0	1	0.974836	0.643346	0.470552	g6707	kinesin-like protein KIF21A isoform 3
clu_3734_NA	scaffold2254:44750-46913	0.294052	2.61e-08	0	4.42e-06	0.00581209	0.179474	0.297582	g6707	kinesin-like protein KIF21A isoform 3
clu_3734_NA	scaffold2254:44114-44709	0.235396	2.61e-08	0	6.61e-06	0.0193687	0.178977	0.235409	g6707	kinesin-like protein KIF21A isoform 3
clu_6419_NA	scaffold10403:20351-22506	0.458344	2.64e-08	0	0.945791	0.986561	0.897159	0.528217	g5151	DNA topoisomerase I, mitochondrial-like
clu_6419_NA	scaffold10403:20351-22599	0.458344	2.64e-08	0	0.0546055	0.0135225	0.105651	0.475273	g5151	DNA topoisomerase I, mitochondrial-like
clu_2080_NA	scaffold979-4:417956-433282	0.502484	2.72e-08	0.13308	0.3959	0	0.635415	0.638324
clu_2080_NA	scaffold979-4:417956-421941	0.285184	2.72e-08	0.492509	0.333273	0	0.219831	0.202259
clu_2080_NA	scaffold979-4:422041-433282	0.223657	2.72e-08	0.390898	0.288297	0	0.157578	0.164305
clu_9232_NA	scaffold15650-3:1638941-1643901	0.393915	2.74e-08	0	0	0	0.553063	0.946978	g34968
clu_9232_NA	scaffold15650-3:1640437-1643901	0.225313	2.74e-08	0	0	0	0.255641	0.0303273	g34968
clu_2570_NA	scaffold320630:16345-24237	0.490743	2.83e-08	0.560384	0.221206	0.155568	0.141079	0.0636054
clu_2570_NA	scaffold320630:23778-24237	0.455724	2.83e-08	0.295933	0.718855	0.637402	0.67086	0.750509
clu_2184_NA	scaffold12579-5:478890-482820	0.359725	2.92e-08	0	0.953039	0.930666	0.826312	0.593238	g28177
clu_2184_NA	scaffold12579-5:481133-482820	0.222925	2.92e-08	0	0.032909	0.0361704	0.0990372	0.255783	g28177
clu_11732_NA	scaffold10211:26710-37177	0.22247	3.02e-08	0.706514	0.483737	0	0.531067	0.50285	g872
clu_4787_NA	scaffold3044:1810969-1833541	0.418178	3.11e-08	0.0567897	0.422265	0.475284	0.276504	0.268661	g18425
clu_4787_NA	scaffold3044:1827828-1833541	0.23779	3.11e-08	0.54491	0.307496	0.297868	0.377095	0.38085	g18425
clu_5692_NA	scaffold557-7:704432-709381	0.667263	3.13e-08	0.848964	0	0	0.181702	0.226668	g29380	RE03909p
clu_5692_NA	scaffold557-7:709004-709381	0.545678	3.13e-08	0.117172	0	0	0.66599	0.648471	g29380	RE03909p
clu_3926_NA	scaffold332-1:368937-373150	0.61533	3.14e-08	0.626612	0	0	0.0149471	0.298449	g26311	lactate dehydrogenase, isoform B
clu_3926_NA	scaffold332-1:369530-373150	0.61533	3.14e-08	0.373937	0	0	0.988718	0.705305	g26311	lactate dehydrogenase, isoform B
clu_7944_NA	scaffold18551:1940729-1941545	0.577454	3.14e-08	0.169308	0.473759	0	0.753778	0.739919	g33299
clu_7944_NA	scaffold18551:1935227-1936568	0.537445	3.14e-08	0.559186	0.283356	0	0.0217405	0.0912549	g33299
clu_7217_NA	scaffold8561:230421-230647	0.388059	3.28e-08	0.127769	0.342965	0.172455	0.260965	0.515828	g4264
clu_7217_NA	scaffold8561:238760-239253	0.375037	3.28e-08	0.868981	0.655785	0.843576	0.746258	0.485373	g4264
clu_1306_NA	scaffold917210:14417-16387	0.400008	3.42e-08	0.576033	0.789928	0.825351	0.904196	0.972181
clu_1306_NA	scaffold917210:14594-16387	0.400008	3.42e-08	0.428649	0.211708	0.176732	0.100716	0.0286671
clu_5319_NA	scaffold11450:559098-601928	0.38951	3.7e-08	0	0	0.624318	0.232691	0.383622	g12741
clu_8913_NA	scaffold7196:34949-41267	0.363329	3.88e-08	0.391775	0.623131	0.755979	0.701133	0	g40454
clu_8913_NA	scaffold7196:38514-41267	0.206883	3.88e-08	0.304032	0.156934	0.10359	0.09407	0	g40454
clu_3061_NA	scaffold8749:1433075-1439942	0.231676	4.47e-08	0.00127869	0.0354296	0.0718545	0.232866	0	g2557
clu_6584_NA	scaffold3326:1296916-1299218	0.836705	4.66e-08	0	0.980317	0.87747	0.46744	0.13492	g16256	ypsilon schachtel, isoform A
clu_6584_NA	scaffold3326:1296916-1297177	0.438658	4.66e-08	0	0.0278674	0.12253	0.308295	0.466525	g16256	ypsilon schachtel, isoform A
clu_6584_NA	scaffold3326:1297221-1299218	0.398048	4.66e-08	0	0.000507182	0.020526	0.224265	0.399066	g16256	ypsilon schachtel, isoform A
clu_9584_NA	scaffold6379:183060-204812	0.293295	4.91e-08	0	0.165606	0.385353	0.4589	0	g38203
clu_9584_NA	scaffold6379:188192-188419	0.201156	4.91e-08	0	0.490474	0.289346	0.344364	0	g38203
clu_10528_NA	scaffold203865:7078-8878	0.71093	4.94e-08	0.0361602	0.38284	0.664197	0.748851	0.690811
clu_10528_NA	scaffold203865:7132-8878	0.71093	4.94e-08	0.968068	0.619498	0.337567	0.253098	0.310428
clu_6770_NA	scaffold648125:1546-7839	0.887226	5.04e-08	0.0245798	0.0937548	0.119862	0	0.911805
clu_6770_NA	scaffold648125:5266-7839	0.887226	5.04e-08	0.977289	0.910533	0.881172	0	0.0886616
clu_11091_NA	scaffold933727:24301-29508	0.356467	5.09e-08	0	0	0	0.984499	0.628032
clu_11091_NA	scaffold933727:25029-29508	0.23639	5.09e-08	0	0	0	1.81e-06	0.236391
clu_9286_NA	scaffold2714-1:81832-105731	0.344645	5.25e-08	5.01e-05	0.0807637	0.0928314	0.274644	0.345704	g17967
clu_9286_NA	scaffold2714-1:82296-105731	0.344645	5.25e-08	1	0.906533	0.908858	0.725988	0.655646	g17967
clu_3632_NA	scaffold150254:13391-35987	0.574695	5.41e-08	0.726149	0.195134	0.764418	0.766176	0.712523
clu_3632_NA	scaffold150254:20814-35987	0.528819	5.41e-08	0.253746	0.743978	0.222599	0.22168	0.261148
clu_12051_NA	scaffold2985-3:9487494-9489967	0.673945	5.42e-08	7.16e-09	0	0	0.676791	0.638112	g18998	ornithine decarboxylase-like
clu_12051_NA	scaffold2985-3:9487494-9499001	0.673945	5.42e-08	1	0	0	0.326055	0.362178	g18998	ornithine decarboxylase-like
clu_752_NA	scaffold4492-20:6039186-6047074	0.361599	5.52e-08	0.638454	0.997705	0.999998	1	0.999998	g21590
clu_752_NA	scaffold4492-20:6039186-6059319	0.361599	5.52e-08	0.3616	0.00229517	2.06e-06	4.04e-07	1.51e-06	g21590
clu_9258_NA	scaffold11018:841139-851050	0.655095	5.82e-08	0.0786105	0.670518	0.320507	0.0149542	0.146732	g11770
clu_9258_NA	scaffold11018:841139-885434	0.655095	5.82e-08	0.941735	0.333985	0.68338	0.986435	0.874674	g11770
clu_10052_NA	scaffold8514-6:367557-377227	0.355388	5.82e-08	0.19685	0.0107416	0.00922113	0.130257	0.365331	g4152
clu_3541_NA	scaffold7827-3:11288702-11298125	0.378265	6.02e-08	0	0.955584	0.867713	0.639562	0.580293	g36365
clu_3541_NA	scaffold7827-3:11288702-11294096	0.202309	6.02e-08	0	0.033789	0.0591276	0.204027	0.242519	g36365
clu_5933_NA	scaffold185-3:540156-541863	0.401195	6.11e-08	0.074885	0.353064	0.4763	0.251269	0.179589	g24666
clu_5933_NA	scaffold185-3:540156-540528	0.251738	6.11e-08	0.597042	0.37758	0.328795	0.443498	0.460545	g24666
clu_11398_NA	scaffold11570-2:254233-290791	0.238003	6.23e-08	0.994893	0.757776	0.756902	0.777327	0	g12978,g12979
clu_2803_NA	scaffold11169:199812-206037	0.270945	6.31e-08	0	0	0.596081	0.371379	0.324404	g11113
clu_2803_NA	scaffold11169:199812-206080	0.270945	6.31e-08	0	0	0.405881	0.628627	0.676827	g11113
clu_5385_NA	scaffold53562:7989687-7993875	0.357632	6.38e-08	0	0	0	0.778811	0.421179	g30722
clu_5385_NA	scaffold53562:7990116-7993875	0.345998	6.38e-08	0	0	0	0.172706	0.518704	g30722
clu_5454_NA	scaffold152710:34248-47371	0.244862	6.71e-08	0.922752	0.999998	1	0.787089	0
clu_3635_NA	scaffold4915:3518375-3523937	0.219219	7.83e-08	0.225703	0.0687532	0.128186	0.0452849	0.000102053	g22327
clu_1943_NA	scaffold6338-5:265070-293833	0.338204	7.85e-08	0.982497	0.925384	0.763736	0.64408	0	g37951
clu_3224_NA	scaffold11390-15:8379-17585	0.300398	8.21e-08	0.400992	0	0	0.100594	0	g12667
clu_3224_NA	scaffold11390-15:8336-17585	0.256022	8.21e-08	2.31e-05	0	0	0.256045	0	g12667
clu_2144_NA	scaffold2280-1:559754-567055	0.214634	8.22e-08	0	0.00165549	0.00544384	4.84e-05	0.215153	g9023
clu_3532_NA	scaffold7827-3:8979185-9003393	0.56906	8.43e-08	0	0.426041	0.523362	0.986317	0.990924	g36345	myotubularin-related protein 2-like
clu_3532_NA	scaffold7827-3:8996945-9003393	0.56906	8.43e-08	0	0.578136	0.479828	0.0137738	0.00909525	g36345	myotubularin-related protein 2-like
clu_9216_NA	scaffold870:7334479-7338918	0.386689	8.69e-08	0.840496	0.77556	0.9921	0.86567	0.606464	g44241	LOW QUALITY PROTEIN: WD repeat-containing protein 62-like
clu_9216_NA	scaffold870:7337118-7338918	0.222482	8.69e-08	0.0825453	0.0992804	0.00394191	0.0655674	0.223513	g44241	LOW QUALITY PROTEIN: WD repeat-containing protein 62-like
clu_8949_NA	scaffold142303:2904-5239	0.399559	9.09e-08	1	0.843414	0.725916	0.682352	0.600628
clu_8949_NA	scaffold142303:2904-8965	0.399559	9.09e-08	7.62e-07	0.157567	0.265657	0.317862	0.399868
clu_229_NA	scaffold438442:7647-11815	0.63647	9.5e-08	0	0	0	0.243762	0.880231	g47497	lethal (2) 01289, isoform B
clu_229_NA	scaffold438442:9130-11815	0.341288	9.5e-08	0	0	0	0.405511	0.0642224	g47497	lethal (2) 01289, isoform B
clu_229_NA	scaffold438442:7647-9029	0.295181	9.5e-08	0	0	0	0.350727	0.0555461	g47497	lethal (2) 01289, isoform B
clu_10676_NA	scaffold8900:277289-277974	0.607674	1.12e-07	0	1	1	0.593736	0.392326	g2775	dynactin subunit 4-like isoform X6
clu_10676_NA	scaffold8900:277289-280182	0.607674	1.12e-07	0	1.08e-07	4.99e-07	0.408371	0.607922	g2775	dynactin subunit 4-like isoform X6
clu_6253_NA	scaffold2345-2:596344-596630	0.602964	1.2e-07	0	0.795065	0.676722	0.631071	0.1914	g9734	gasp, isoform A
clu_6253_NA	scaffold2345-2:596344-597648	0.602964	1.2e-07	0	0.209751	0.32465	0.369817	0.808937	g9734	gasp, isoform A
clu_3127_NA	scaffold55-2:4976171-4976520	0.758437	1.28e-07	0.160041	0.88893	0.920647	0	0	g27355
clu_3127_NA	scaffold55-2:4976371-4976520	0.403077	1.28e-07	0.464499	0.0678933	0.0427011	0	0	g27355
clu_3127_NA	scaffold55-2:4976171-4976312	0.362292	1.28e-07	0.401411	0.0496481	0.0505113	0	0	g27355
clu_8292_NA	scaffold50174-3:124367-132616	0.249199	1.37e-07	0	0	8.31e-09	0.113841	0.24928	g30201
clu_8292_NA	scaffold50174-3:123578-132616	0.249199	1.37e-07	0	0	1	0.893239	0.750801	g30201
clu_6672_NA	scaffold6943:211556-212241	0.626364	1.41e-07	0	0.996511	0.992174	0.514631	0.372202	g40758	dynactin subunit 4-like isoform X6
clu_6672_NA	scaffold6943:211556-214447	0.626364	1.41e-07	0	0.00348999	0.00839043	0.486	0.629853	g40758	dynactin subunit 4-like isoform X6
clu_9103_NA	scaffold6919:17461-19822	0.205651	1.46e-07	0	0.31693	0.105946	0.172191	0.157105	g37320
clu_5043_NA	scaffold11330-2:97129-98576	0.435459	1.46e-07	0	0.0126487	0.0276102	0.0756003	0.448123	g11307
clu_5043_NA	scaffold11330-2:96542-98576	0.410783	1.46e-07	0	0.946645	0.914527	0.916763	0.520618	g11307
clu_9970_NA	scaffold4473:823713-849043	0.212813	1.49e-07	0.774168	0.987071	0.974998	0.951074	0.914812	g21420
clu_9970_NA	scaffold4473:845488-849043	0.212813	1.49e-07	0.238953	0.0129191	0.0285212	0.0500211	0.0875532	g21420
clu_11452_NA	scaffold3538:1957370-1958987	0.217132	1.56e-07	0	0	1	0.782868	0.838679	g16519
clu_11452_NA	scaffold3538:1957370-1959617	0.217132	1.56e-07	0	0	3.37e-08	0.217135	0.162401	g16519
clu_10034_NA	scaffold36:695728-709893	0.290691	1.58e-07	0	0	0	0.329723	0.0390317
clu_10034_NA	scaffold36:695728-774345	0.290691	1.58e-07	0	0	0	0.670277	0.960968
clu_4385_NA	scaffold6331-2:1770312-1771945	0.303642	1.79e-07	0	1	0.995675	0.89771	0.696385	g37875
clu_4385_NA	scaffold6331-2:1771378-1771945	0.303642	1.79e-07	0	1.01e-08	0.00441155	0.104891	0.305572	g37875
clu_4769_NA	scaffold7357:582561-585723	0.404972	1.82e-07	0	0.478956	0.404558	0.164629	0.0704829
clu_4769_NA	scaffold7357:585503-585723	0.290744	1.82e-07	0	0.187441	0.261837	0.467304	0.478224
clu_4769_NA	scaffold7357:582561-585367	0.207027	1.82e-07	0	0.211433	0.252519	0.307719	0.419185
clu_3585_NA	scaffold787-3:621811-625376	0.571733	1.84e-07	0	0	0.99171	0	0.419977	g43981	chitin deacetylase-like 5, isoform B
clu_3585_NA	scaffold787-3:624683-625376	0.311542	1.84e-07	0	0	0.00608182	0	0.317624	g43981	chitin deacetylase-like 5, isoform B
clu_3585_NA	scaffold787-3:621811-622917	0.26019	1.84e-07	0	0	0.00220816	0	0.262398	g43981	chitin deacetylase-like 5, isoform B
clu_2408_NA	scaffold628-14:1806674-1818683	0.543972	1.84e-07	0.265522	0.762037	0.741979	0.809514	0.723499	g45174	serine/threonine-protein kinase TAO1-B-like
clu_2408_NA	scaffold628-14:1807190-1818683	0.543972	1.84e-07	0.739991	0.240674	0.258792	0.190506	0.292632	g45174	serine/threonine-protein kinase TAO1-B-like
clu_3587_NA	scaffold787-3:635566-639597	0.45264	1.84e-07	0	0	0.953766	0	0.501126	g43981	chitin deacetylase-like 5, isoform B
clu_3587_NA	scaffold787-3:636474-639597	0.251372	1.84e-07	0	0	0.0220547	0	0.273427	g43981	chitin deacetylase-like 5, isoform B
clu_3587_NA	scaffold787-3:635566-636391	0.201268	1.84e-07	0	0	0.0241795	0	0.225448	g43981	chitin deacetylase-like 5, isoform B
clu_8604_NA	scaffold12574-1:450458-478753	0.494486	1.88e-07	0	1	1	0.986459	0.505613	g28141	shootin-1-like, partial
clu_8604_NA	scaffold12574-1:450488-478753	0.494486	1.88e-07	0	3.02e-08	1.86e-08	0.0135413	0.494486	g28141	shootin-1-like, partial
clu_8031_NA	scaffold757:3560070-3563489	0.404865	1.98e-07	0	0.563629	0.790085	0.899119	0.976866	g44604
clu_8031_NA	scaffold757:3560209-3563489	0.269471	1.98e-07	0	0.310514	0.141672	0.073437	0.0212211	g44604
clu_10592_NA	scaffold6462-2:1341005-1347944	0.660463	1.99e-07	3.43e-08	0.543448	0.609224	0.660806	0	g38340	scavenger receptor acting in neural tissue and majority of rhodopsin is absent, isoform C
clu_10592_NA	scaffold6462-2:1346089-1347944	0.660463	1.99e-07	1	0.456573	0.390814	0.339537	0	g38340	scavenger receptor acting in neural tissue and majority of rhodopsin is absent, isoform C
clu_7461_NA	scaffold2317:269963-278085	0.39103	2.04e-07	0.927502	0.896166	0.873613	0.745815	0.523384	g9576	IP04501p
clu_7461_NA	scaffold2317:269963-276797	0.234161	2.04e-07	0.0788191	0.0490882	0.0624709	0.121611	0.279333	g9576	IP04501p
clu_5066_NA	scaffold10438:129061-130445	0.315104	2.1e-07	3.42e-07	0.0990455	0.328738	0.136184	0	g5193
clu_5066_NA	scaffold10438:129061-131819	0.315104	2.1e-07	1	0.901983	0.684896	0.880175	0	g5193
clu_7890_NA	scaffold236:630988-654544	0.368994	2.11e-07	0	0.953558	0.999045	0.927888	0.682665	g25224
clu_7890_NA	scaffold236:630988-644874	0.289543	2.11e-07	0	2.49e-05	0.000945443	0.0236273	0.289568	g25224
clu_8252_NA	scaffold7942-2:3501213-3506995	0.764504	2.11e-07	0.997794	0.442723	0.236305	0	0	g36729	asterix
clu_8252_NA	scaffold7942-2:3501213-3516754	0.764504	2.11e-07	0.00221004	0.557277	0.76671	0	0	g36729	asterix
clu_9803_NA	scaffold756-9:1591934-1600596	0.640084	2.11e-07	0.244258	0.832985	0.88437	0.762088	0
clu_9803_NA	scaffold756-9:1591387-1600596	0.534606	2.11e-07	0.611807	0.131528	0.071441	0.199841	0
clu_8790_NA	scaffold5764-3:3022544-3025834	0.330605	2.12e-07	0.351859	0.032493	0.0264542	0.00598331	0	g19572	set1/Ash2 histone methyltransferase complex subunit ASH2-like
clu_8790_NA	scaffold5764-3:3022544-3025936	0.311896	2.12e-07	0.661898	0.900834	0.973795	0.915775	0	g19572	set1/Ash2 histone methyltransferase complex subunit ASH2-like
clu_10008_NA	scaffold12564-1:3715-4520	0.361307	2.26e-07	0	0	0	0.923038	0.561731	g28124,g28122
clu_10008_NA	scaffold12564-1:9307-10115	0.34546	2.26e-07	0	0	0	0.0638645	0.409325	g28124,g28122
clu_4326_NA	scaffold2683:113846-115422	0.538871	2.3e-07	0	0	0	0.961055	0.422184	g10659	troponin C at 41C, isoform B
clu_4326_NA	scaffold2683:114379-115422	0.538871	2.3e-07	0	0	0	0.0389447	0.577816	g10659	troponin C at 41C, isoform B
clu_3675_NA	scaffold17496-1:189926-201153	0.667138	2.38e-07	0.26482	0.931958	0	0	0	g33041	traB domain-containing protein-like isoform X2
clu_3675_NA	scaffold17496-1:192851-201153	0.456822	2.38e-07	0.503414	0.0465913	0	0	0	g33041	traB domain-containing protein-like isoform X2
clu_6781_NA	scaffold4445-8:332742-367561	0.309962	2.38e-07	0.270163	0.486754	0.561696	0.481164	0	g21359,g21360
clu_6781_NA	scaffold4445-8:332264-332614	0.258275	2.38e-07	0.305582	0.0799188	0.0410947	0.107684	0	g21359,g21360
clu_6781_NA	scaffold4445-8:300346-332614	0.23405	2.38e-07	0.148904	0.382954	0.317511	0.297972	0	g21359,g21360
clu_6781_NA	scaffold4445-8:300346-330775	0.23283	2.38e-07	0.284826	0.0544771	0.0530143	0.117347	0	g21359,g21360
clu_9588_NA	scaffold411018:5713-20715	0.298311	2.49e-07	0	0.204045	0.385216	0.0945857	0.086185
clu_11993_NA	scaffold10286:48040-52225	0.383442	2.57e-07	0.647197	0.764514	0.621099	0.52625	0.377433	g1043
clu_11993_NA	scaffold10286:48040-49971	0.231111	2.57e-07	0.213733	0.138519	0.235582	0.284496	0.375221	g1043
clu_2079_NA	scaffold979-4:382677-417855	0.262442	2.76e-07	0.0271074	0.0691109	0.0297639	0.214606	0.289216	g43629
clu_2079_NA	scaffold979-4:406817-417855	0.217543	2.76e-07	0.575202	0.465122	0.526372	0.45967	0.365769	g43629
clu_7348_NA	scaffold8504-3:2954211-2971554	0.771666	2.77e-07	0.983058	0.580227	0	0	0.211046	g4094
clu_7348_NA	scaffold8504-3:2954211-2957480	0.538757	2.77e-07	0.017099	0.269734	0	0	0.562319	g4094
clu_7348_NA	scaffold8504-3:2957601-2971554	0.23291	2.77e-07	0.000355904	0.155821	0	0	0.233098	g4094
clu_6192_NA	scaffold2217:516263-525101	0.525508	2.78e-07	0.481844	0.973618	0.974377	0.988234	0.992637	g6411	ribosomal protein S27A
clu_6192_NA	scaffold2217:516263-523209	0.525508	2.78e-07	0.534696	0.0250272	0.0238981	0.0119067	0.00748621	g6411	ribosomal protein S27A
clu_5191_NA	scaffold252218:23428-25020	0.244945	2.81e-07	0.911667	0.791387	0.7553	0.933906	1
clu_8923_NA	scaffold2129:5378490-5385390	0.341609	2.83e-07	0	0.00295183	0.0123212	0.274697	0.344677	g5938
clu_8923_NA	scaffold2129:5378490-5392771	0.341609	2.83e-07	0	0.997082	0.987804	0.725323	0.655923	g5938
clu_6014_NA	scaffold8220-1:178911-188987	0.57037	2.85e-07	0.57037	2.35e-08	1.49e-09	5.96e-08	0	g3488
clu_6014_NA	scaffold8220-1:186186-188987	0.57037	2.85e-07	0.429643	1	1	1	0	g3488
clu_11705_NA	scaffold44459-20:4462681-4463806	0.260522	2.86e-07	0.66597	0.564554	0.552863	0.467495	0.401511	g32440
clu_7827_NA	scaffold10634:11267897-11298287	0.669833	2.89e-07	0.0533495	0.721467	0.482281	0.487551	0	g5498
clu_7827_NA	scaffold10634:11297536-11298287	0.416585	2.89e-07	0.605451	0.18954	0.242054	0.34656	0	g5498
clu_7827_NA	scaffold10634:11267897-11297409	0.253248	2.89e-07	0.377288	0.105311	0.223798	0.184701	0	g5498
clu_9223_NA	scaffold870:7592716-7617094	0.572191	2.91e-07	0.850217	0.379915	0.336829	0.299824	0.277979	g44249,g44250	glycerol-3-phosphate acyltransferase 1, mitochondrial-like, partial
clu_9223_NA	scaffold870:7611963-7617094	0.572191	2.91e-07	0.149994	0.602169	0.666688	0.701174	0.722313	g44249,g44250	glycerol-3-phosphate acyltransferase 1, mitochondrial-like, partial
clu_8622_NA	scaffold13236-4:3272885-3336353	0.508603	2.93e-07	0	0	0	0.72792	0.219316	g15028	SUN domain-containing protein 2-like isoform X2
clu_8622_NA	scaffold13236-4:3272885-3306756	0.375394	2.93e-07	0	0	0	0.18597	0.561364	g15028	SUN domain-containing protein 2-like isoform X2
clu_6432_NA	scaffold8757-1:272315-276033	0.616542	2.98e-07	0.868105	0.783912	0.782685	0.443289	0.244675	g2565	ras-specific guanine nucleotide-releasing factor RalGPS2-like isoform X2
clu_6432_NA	scaffold8757-1:272315-276051	0.616542	2.98e-07	0.138783	0.25837	0.246985	0.567519	0.767141	g2565	ras-specific guanine nucleotide-releasing factor RalGPS2-like isoform X2
clu_9843_NA	scaffold2062:269022-274867	0.385365	3.14e-07	0.0518573	0.437223	0.380673	0	0	g7452
clu_9973_NA	scaffold7830:662052-667581	0.365035	3.14e-07	0.638128	0.997921	0.995417	1	1	g36398
clu_9973_NA	scaffold7830:662052-669224	0.361875	3.14e-07	0.361875	1.03e-09	1.23e-08	4.63e-46	6.61e-16	g36398
clu_9843_NA	scaffold2062:269022-272181	0.20898	3.14e-07	0.514199	0.305219	0.333995	0	0	g7452
clu_2006_NA	scaffold892-2:178845-183557	0.391805	3.15e-07	0.974996	0	0	0.583191	0	g44342
clu_2006_NA	scaffold892-2:181190-183557	0.238684	3.15e-07	0.0124956	0	0	0.25118	0	g44342
clu_5519_NA	scaffold71507:13188114-13196610	0.48796	3.16e-07	0	0.985197	0.93168	0.497139	0.609793	g49429	Seryl-tRNA synthetase, isoform B
clu_5519_NA	scaffold71507:13192398-13196610	0.346732	3.16e-07	0	0.01502	0.0683196	0.361729	0.293698	g49429	Seryl-tRNA synthetase, isoform B
clu_1149_NA	scaffold2344:1328902-1338490	0.425486	3.16e-07	0	0	0.41278	0.41133	0.837242	g9715
clu_1149_NA	scaffold2344:1328902-1339527	0.425486	3.16e-07	0	0	0.587485	0.591145	0.163184	g9715
clu_4376_NA	scaffold6331-2:1311313-1317583	0.539229	3.19e-07	1	1	1	0.836451	0.462277	g37867,g37866	inactivation-no-after-potential D protein-like
clu_4376_NA	scaffold6331-2:1312282-1317583	0.539229	3.19e-07	4.76e-07	3.45e-08	8.16e-07	0.164391	0.539229	g37867,g37866	inactivation-no-after-potential D protein-like
clu_5114_NA	scaffold3373-1:11812338-11815095	0.376586	3.21e-07	0.369682	0.107515	0.115197	0.283954	0.49017	g15322
clu_5114_NA	scaffold3373-1:11812338-11814592	0.33546	3.21e-07	0.597605	0.816278	0.782359	0.708399	0.471521	g15322
clu_8463_NA	scaffold45467:18519-26228	0.261351	3.3e-07	0.729657	0.996948	0.973761	0.963634	0	g32539
clu_6507_NA	scaffold8695-1:4080-35919	0.513111	3.53e-07	0	0.0375928	0.0106015	0.159051	0.538489	g2510	zinc finger protein 37 homolog
clu_6507_NA	scaffold8695-1:4308-35919	0.513111	3.53e-07	0	0.963177	0.990115	0.848258	0.477005	g2510	zinc finger protein 37 homolog
clu_1485_NA	scaffold3435-7:2344838-2350033	0.244704	3.8e-07	0.0414663	0.287986	0.190391	0.155815	0.157809	g15556,g15558,g15557
clu_1485_NA	scaffold3435-7:2344838-2347483	0.200675	3.8e-07	0.323481	0.118279	0.150757	0.174942	0.203088	g15556,g15558,g15557
clu_5898_NA	scaffold9175:4661131-4666579	0.778363	3.81e-07	0.816097	0.037871	0.135259	0.229806	0	g3073	tumor susceptibility gene 101 protein-like isoform X5
clu_5898_NA	scaffold9175:4661851-4666579	0.778363	3.81e-07	0.18422	0.962577	0.866457	0.7824	0	g3073	tumor susceptibility gene 101 protein-like isoform X5
clu_2932_NA	scaffold6345:463977-470874	0.516484	3.85e-07	0.478434	0.995074	0.979123	0.905459	0.920695	g38012	mannose-1-phosphate guanyltransferase alpha-like isoform X1
clu_2932_NA	scaffold6345:467296-470874	0.363443	3.85e-07	0.382175	0.00508085	0.0319413	0.0957761	0.079606	g38012	mannose-1-phosphate guanyltransferase alpha-like isoform X1
clu_7915_NA	scaffold228-1:432770-453913	0.693694	3.89e-07	0.240101	0	0.933795	0	0	g25056	zinc finger C2HC domain-containing protein 1A isoform X2
clu_7915_NA	scaffold228-1:432770-436577	0.35872	3.89e-07	0.392956	0	0.0342358	0	0	g25056	zinc finger C2HC domain-containing protein 1A isoform X2
clu_7915_NA	scaffold228-1:436594-453913	0.334974	3.89e-07	0.366943	0	0.0319692	0	0	g25056	zinc finger C2HC domain-containing protein 1A isoform X2
clu_5552_NA	scaffold7601-1:1343469-1347616	0.594584	3.89e-07	0.265624	0.641669	0.442608	0.0278039	0	g39328	partner of drosha, isoform C
clu_5552_NA	scaffold7601-1:1343469-1344514	0.470665	3.89e-07	0.420812	0.210978	0.321117	0.691393	0	g39328	partner of drosha, isoform C
clu_10218_NA	scaffold479-9:671052-690666	0.303687	3.98e-07	0.023826	0.0519693	0.0377046	0.138293	0.341899	g28817
clu_7743_NA	scaffold3051:14295439-14303868	0.865388	4.08e-07	0.873891	0.0159411	0.00519504	0	0.131797	g18623	beta,beta-carotene 9',10'-oxygenase-like isoform X2
clu_7743_NA	scaffold3051:14303436-14303868	0.865388	4.08e-07	0.129416	0.984194	0.994837	0	0.869684	g18623	beta,beta-carotene 9',10'-oxygenase-like isoform X2
clu_11861_NA	scaffold483480:8406-16772	0.395422	4.1e-07	0	0.938613	0.981296	0.812344	0.585874
clu_11861_NA	scaffold483480:12884-16772	0.210397	4.1e-07	0	0.0233613	0.00911962	0.0871975	0.220917
clu_2941_NA	scaffold6345:3121158-3139839	0.262663	4.19e-07	0.256918	0.283813	0.126049	0.0721267	1.84e-06	g38036
clu_2941_NA	scaffold6345:3121752-3139839	0.262663	4.19e-07	0.79869	0.737493	0.923214	0.967138	1	g38036
clu_2822_NA	scaffold6476:1082645-1110802	0.57614	4.29e-07	0	0.023702	0.024289	0.402716	0.599803	g37344	still life, isoform P
clu_2822_NA	scaffold6476:1103028-1110802	0.57614	4.29e-07	0	0.976341	0.975828	0.599411	0.40037	g37344	still life, isoform P
clu_45_NA	scaffold9678:274507-284791	0.459172	4.3e-07	0	0.819516	0.788688	0.355727	0	g1558	dolichyl-diphosphooligosaccharide--protein glycosyltransferase subunit 2-like isoform X1
clu_45_NA	scaffold9678:274507-278241	0.210074	4.3e-07	0	3.93e-05	0.035686	0.210114	0	g1558	dolichyl-diphosphooligosaccharide--protein glycosyltransferase subunit 2-like isoform X1
clu_6918_NA	scaffold99:443341-452769	0.210299	4.47e-07	0.991596	0.977697	0.955928	0.856081	0.781435	g27860
clu_4582_NA	scaffold67:1303726-1347564	0.432314	4.6e-07	0	0.96697	0.799299	0.607591	0.534656	g27454
clu_4582_NA	scaffold67:1317617-1347564	0.432314	4.6e-07	0	0.0340297	0.20545	0.394262	0.470978	g27454
clu_1787_NA	scaffold2283-13:2593872-2600549	0.494543	5.2e-07	0	0.486928	0.840465	0.931201	0.978334	g9072,g9073
clu_1787_NA	scaffold2283-13:2594035-2600549	0.494543	5.2e-07	0	0.516976	0.160557	0.0696315	0.0224328	g9072,g9073
clu_8868_NA	scaffold2812-4:361465-378410	0.261346	5.2e-07	0	0	0.632247	0.56015	0.370901	g18173,g18174
clu_8868_NA	scaffold2812-4:361465-405892	0.261346	5.2e-07	0	0	0.367893	0.440101	0.629131	g18173,g18174
clu_3267_NA	scaffold7078:7350615-7360517	0.382734	5.26e-07	0.558651	0.695672	0.779372	0.932122	0.944904	g40300
clu_3267_NA	scaffold7078:7350615-7360329	0.360394	5.26e-07	0.395861	0.127307	0.0837987	0.0359748	0.034577	g40300
clu_9219_NA	scaffold870:7351232-7355028	0.555447	5.33e-07	0.0958969	0.315342	0.279743	0.269953	0.651582	g44241	LOW QUALITY PROTEIN: WD repeat-containing protein 62-like
clu_9219_NA	scaffold870:7351232-7355079	0.555447	5.33e-07	0.904277	0.688696	0.731547	0.731643	0.350305	g44241	LOW QUALITY PROTEIN: WD repeat-containing protein 62-like
clu_11657_NA	scaffold278-1:5007930-5017568	0.213072	5.42e-07	0.994308	0.97407	0.976222	0.873877	0.806825	g25677
clu_10845_NA	scaffold849680:3845-4335	0.41965	5.54e-07	0	0.946493	0.957122	0.669079	0.538014
clu_10845_NA	scaffold849680:3845-4401	0.41965	5.54e-07	0	0.0568448	0.0524409	0.33657	0.462529
clu_4361_NA	scaffold6331-2:281407-287004	0.271076	5.64e-07	0	0	0.98038	0.709304	0	g37854
clu_496_NA	scaffold1781:2229878-2230535	0.281855	5.76e-07	0.377337	0.0841501	0.0822718	0.198223	0.249869	g45499
clu_496_NA	scaffold1781:2230248-2230535	0.251418	5.76e-07	0.217149	0.471613	0.423628	0.364545	0.391477	g45499
clu_496_NA	scaffold1781:2229601-2230138	0.202195	5.76e-07	0.185683	0.376611	0.387995	0.26201	0.235017	g45499
clu_10977_NA	scaffold4421:2530771-2538841	0.657483	6.01e-07	0	0	0	0.925429	0.267946
clu_10977_NA	scaffold4421:2479857-2487722	0.344607	6.01e-07	0	0	0	0.0355132	0.38012
clu_10977_NA	scaffold4421:2487721-2514022	0.271128	6.01e-07	0	0	0	0.000259514	0.271387
clu_2823_NA	scaffold6476:1167638-1167849	0.365648	6.21e-07	0	0.985753	0.941985	0.810858	0.620207	g37345
clu_2823_NA	scaffold6476:1167638-1167885	0.365648	6.21e-07	0	0.0142878	0.0580535	0.189287	0.379989	g37345
clu_4784_NA	scaffold3044:233303-242805	0.750936	6.22e-07	1	1	0	0.249064	0	g18413	LOW QUALITY PROTEIN: dynein beta chain, ciliary-like
clu_4784_NA	scaffold3044:240240-242805	0.750936	6.22e-07	1.14e-08	8.36e-09	0	0.750936	0	g18413	LOW QUALITY PROTEIN: dynein beta chain, ciliary-like
clu_7664_NA	scaffold3051:1540615-1548331	0.454797	6.5e-07	0.0304892	0.487173	0.405867	0.36164	0	g18457	condensin-2 complex subunit G2-like
clu_7664_NA	scaffold3051:1540615-1544522	0.23826	6.5e-07	0.533037	0.273269	0.367913	0.325549	0	g18457	condensin-2 complex subunit G2-like
clu_7664_NA	scaffold3051:1544581-1548331	0.216537	6.5e-07	0.475425	0.245064	0.267531	0.319549	0	g18457	condensin-2 complex subunit G2-like
clu_4827_NA	scaffold12031-2:1669705-1674467	0.470729	7.07e-07	0	0.0758082	0.090324	0.55257	0	g29678	pyridoxal kinase isoform X2
clu_4827_NA	scaffold12031-2:1669705-1672985	0.43425	7.07e-07	0	0.867743	0.849743	0.419459	0	g29678	pyridoxal kinase isoform X2
clu_1443_NA	scaffold11649:657560-666889	0.496632	7.11e-07	0.21674	0.491428	0.706726	0.633343	0.543118	g13109	ankyrin 2, isoform AA
clu_1443_NA	scaffold11649:661150-666889	0.314788	7.11e-07	0.452753	0.221618	0.141861	0.176019	0.247875	g13109	ankyrin 2, isoform AA
clu_9887_NA	scaffold6842:47186-58083	0.44997	7.5e-07	0.229722	0.500724	0.0614526	0.036871	5.2e-07	g37762	poly(A) polymerase gamma
clu_9887_NA	scaffold6842:51985-58083	0.44997	7.5e-07	0.840371	0.550029	0.938547	0.98447	0.999999	g37762	poly(A) polymerase gamma
clu_651_NA	scaffold8579:219836-224849	0.663504	7.63e-07	0	1	0	0.908825	0.336483	g4342	la-related protein 1B-like isoform X3
clu_651_NA	scaffold8579:219749-224849	0.441694	7.63e-07	0	4.99e-06	0	0.0911754	0.441774	g4342	la-related protein 1B-like isoform X3
clu_651_NA	scaffold8579:219728-224849	0.22181	7.63e-07	0	7.82e-06	0	0.0135667	0.221818	g4342	la-related protein 1B-like isoform X3
clu_7672_NA	scaffold3051:2061286-2074491	0.420594	7.63e-07	0	0.0518997	0.132609	0.470491	0.446543	g18466	transforming acidic coiled-coil-containing protein 2-like isoform X2
clu_7672_NA	scaffold3051:2063930-2074491	0.280338	7.63e-07	0	0.495141	0.357663	0.216417	0.275967	g18466	transforming acidic coiled-coil-containing protein 2-like isoform X2
clu_7672_NA	scaffold3051:2061286-2063859	0.225671	7.63e-07	0	0.475281	0.51553	0.315184	0.28797	g18466	transforming acidic coiled-coil-containing protein 2-like isoform X2
clu_9355_NA	scaffold212:14008-20902	0.290556	7.78e-07	0.326325	0.0643436	0.0355337	0.0882696	0.168262	g24814
clu_9355_NA	scaffold212:14008-21262	0.290556	7.78e-07	0.678766	0.936914	0.964938	0.912344	0.831738	g24814
clu_9115_NA	scaffold867:1286588-1291303	0.938253	8e-07	0.958328	0.0119173	0	0.660634	0	g44135	SET and MYND domain-containing protein 4-like
clu_9115_NA	scaffold867:1286588-1289856	0.833069	8e-07	0.0416717	0.879645	0	0.339366	0	g44135	SET and MYND domain-containing protein 4-like
clu_11217_NA	scaffold6858:100701-130050	0.372894	8.18e-07	0	0.0581401	0.104096	0.286317	0.430772	g36908
clu_2379_NA	scaffold2547-2:101408-101647	0.269933	8.65e-07	0.081764	0.357394	0.325406	0.296574	0.275239	g10172
clu_2379_NA	scaffold2547-2:101408-101668	0.269933	8.65e-07	0.92014	0.648606	0.67461	0.704561	0.735485	g10172
clu_10865_NA	scaffold476758:3223-9881	0.565429	9.02e-07	0.173158	0.738587	0	0	0
clu_10865_NA	scaffold476758:3223-5516	0.303538	9.02e-07	0.443887	0.140348	0	0	0
clu_10865_NA	scaffold476758:5566-9881	0.26189	9.02e-07	0.382955	0.121065	0	0	0
clu_9593_NA	scaffold2396-1:568685-573234	0.200131	9.04e-07	0.0227636	0.215334	0.193495	0.222979	0	g8054
clu_4457_NA	scaffold10522:773664-773898	0.226021	9.35e-07	0.665367	0.439308	0.500877	0.598296	0.648519	g5215
clu_4457_NA	scaffold10522:773670-773898	0.226021	9.35e-07	0.33532	0.561018	0.499197	0.401746	0.352621	g5215
clu_12130_NA	scaffold12968:56536-62582	0.25829	9.66e-07	0.719274	0.460984	0	0	0	g28392
clu_6110_NA	scaffold11644:1246619-1250953	0.207152	1.03e-06	0.506496	0.510343	0.667291	0.711031	0.675391	g13060
clu_6110_NA	scaffold11644:1246505-1250953	0.207044	1.03e-06	0.329537	0.496809	0.351258	0.294406	0.33419	g13060
clu_1327_NA	scaffold40184:160336-161075	0.437576	1.08e-06	0	1	1	0.98472	0.562505	g32135	FERM domain-containing protein 4A-like
clu_1327_NA	scaffold40184:160336-161223	0.437576	1.08e-06	0	3.88e-09	1.63e-08	0.01528	0.437576	g32135	FERM domain-containing protein 4A-like
clu_5492_NA	scaffold71507:1848989-1854865	0.354209	1.14e-06	0	0.202102	0.0646001	0.30007	0.418809	g49354
clu_5492_NA	scaffold71507:1850386-1854865	0.240125	1.14e-06	0	0.418009	0.520559	0.373745	0.272545	g49354
clu_1841_NA	scaffold6803-28:1041207-1044522	0.362276	1.16e-06	0	0	0.362276	1.03e-05	9.31e-08	g37477
clu_1841_NA	scaffold6803-28:1089769-1101605	0.35451	1.16e-06	0	0	0.58366	0.926659	0.953643	g37477
clu_4477_NA	scaffold5394:69431-69872	0.492468	1.18e-06	0.324134	0	0	0.816602	0
clu_4477_NA	scaffold5394:70091-70674	0.419674	1.18e-06	0.575962	0	0	0.156288	0
clu_7994_NA	scaffold3362-3:99464-186481	0.447365	1.21e-06	0.456047	0	0	0.00868194	0.00995085	g16279
clu_7994_NA	scaffold3362-3:99464-175416	0.38715	1.21e-06	8.55e-05	0	0	0.336881	0.39214	g16279
clu_2622_NA	scaffold233701:30342-40246	0.447942	1.22e-06	0	0.194355	0.229764	0.644904	0.619938
clu_2622_NA	scaffold233701:30439-40246	0.427447	1.22e-06	0	0.769696	0.772112	0.356742	0.383235
clu_5532_NA	scaffold21080:3099246-3141205	0.246905	1.26e-06	0.299509	0.205744	0.176856	0.328393	0.392738
clu_5554_NA	scaffold7601-1:1596754-1603583	0.296399	1.28e-06	0	0	0	0.0911476	0.387546	g39331	megakaryocyte stimulating factor
clu_1570_NA	scaffold315:1869014-1873960	0.281481	1.3e-06	0.748577	0.460076	0.623474	0.484444	0.663127	g26143
clu_4485_NA	scaffold5394:1722793-1727252	0.287621	1.3e-06	4.97e-06	1.95e-06	0.0147305	0.287623	0	g23895
clu_4485_NA	scaffold5394:1722793-1730620	0.274977	1.3e-06	0.935337	0.956037	0.935328	0.68106	0	g23895
clu_3773_NA	scaffold10060:215440-240556	0.338196	1.31e-06	0.0241984	0.0981625	0.128236	0.360654	0.276758
clu_3773_NA	scaffold10060:235209-240556	0.338196	1.31e-06	0.977654	0.902209	0.8648	0.639346	0.716718
clu_2634_NA	scaffold640137:2085-7318	0.807182	1.33e-06	0.807182	8.05e-57	5.48e-09	0	0
clu_2634_NA	scaffold640137:4246-7318	0.807182	1.33e-06	0.192823	1	1	0	0
clu_10570_NA	scaffold2288-75:814828-821077	0.424256	1.35e-06	0.924091	0.903066	0.822836	0.538553	0.486932	g9383
clu_10570_NA	scaffold2288-75:814828-821852	0.416196	1.35e-06	0.0322718	0.102997	0.177164	0.461447	0.441637	g9383
clu_4374_NA	scaffold6331-2:1288301-1302037	0.223671	1.35e-06	0	1	1	0.893964	0.776343	g37866	predicted protein
clu_4374_NA	scaffold6331-2:1293947-1302037	0.223671	1.35e-06	0	1.84e-07	9.62e-09	0.107038	0.224944	g37866	predicted protein
clu_6251_NA	scaffold2345-2:596851-607471	0.491524	1.36e-06	0	0.867854	0.870056	0.801777	0.37772	g9734	gasp, isoform A
clu_6251_NA	scaffold2345-2:597881-607471	0.491524	1.36e-06	0	0.142041	0.142468	0.209549	0.623503	g9734	gasp, isoform A
clu_8041_NA	scaffold1795-37:253914-288164	0.322634	1.41e-06	0	0	0.00661556	0.329249	0
clu_8041_NA	scaffold1795-37:256828-288164	0.322634	1.41e-06	0	0	0.993384	0.670751	0
clu_6723_NA	scaffold11991:447236-449444	0.619753	1.49e-06	0	0.99	0.929662	0.470073	0.370355	g29618,g29619	Schwannomin-interacting protein 1
clu_6723_NA	scaffold11991:447236-507248	0.619753	1.49e-06	0	0.0101654	0.0703539	0.530793	0.631448	g29618,g29619	Schwannomin-interacting protein 1
clu_10980_NA	scaffold4421:2530898-2538968	0.471948	1.5e-06	0	0	0	0.00260008	0.474548
clu_10980_NA	scaffold4421:2514148-2522004	0.455746	1.5e-06	0	0	0	0.557577	0.101831
clu_11360_NA	scaffold44358:3696192-3704436	0.999164	1.52e-06	0.00083643	0.973131	0.998432	1	0.992009	g32389	vesicle-associated membrane protein 3-like isoform X2
clu_11360_NA	scaffold44358:3696192-3711852	0.999164	1.52e-06	0.999168	0.0272336	0.00156773	9.84e-10	0.00875023	g32389	vesicle-associated membrane protein 3-like isoform X2
clu_5405_NA	scaffold9838-8:521058-528420	0.413245	1.57e-06	0.302548	0.702326	0	0.477391	0	g1936
clu_3892_NA	scaffold9865:7198297-7202810	0.370523	1.58e-06	0.504113	0.186634	0.28109	0.459316	0.557146	g58
clu_3892_NA	scaffold9865:7198297-7202492	0.207532	1.58e-06	0.296597	0.455739	0.422308	0.291437	0.255602	g58
clu_3022_NA	scaffold53060:7712470-7723434	0.392674	1.62e-06	0	0	0.542625	0	0.149952	g30557
clu_3022_NA	scaffold53060:7712461-7725618	0.229578	1.62e-06	0	0	6.99e-06	0	0.229585	g30557
clu_3351_NA	scaffold3790-12:3570227-3578387	0.316144	1.67e-06	0.00165815	0	0	0.317802	0	g13189
clu_3351_NA	scaffold3790-12:3570227-3570990	0.224946	1.67e-06	0.710351	0	0	0.485405	0	g13189
clu_8522_NA	scaffold2392:1531963-1557717	0.28673	1.73e-06	0	0.995685	0.980164	0.885394	0.708819	g8013
clu_4928_NA	scaffold7849:34089-44470	0.341749	1.78e-06	0.571237	0.917257	0.793515	0	0
clu_4928_NA	scaffold7849:34089-44140	0.240164	1.78e-06	0.303684	0.0718875	0.179731	0	0
clu_9882_NA	scaffold49156:285049-309594	0.66912	1.78e-06	0.18847	0.160385	0.328207	0.645171	0.8507	g32771	chromatin modification-related protein EAF1-like
clu_9882_NA	scaffold49156:285697-309594	0.660508	1.78e-06	0.81153	0.839615	0.690236	0.356923	0.169899	g32771	chromatin modification-related protein EAF1-like
clu_10015_NA	scaffold71310-1:64352-114061	0.797088	1.83e-06	0.888414	0.0832764	0.126801	0.490068	0.365146	g50106	tumor protein p53-inducible nuclear protein 2
clu_10015_NA	scaffold71310-1:83600-114061	0.797088	1.83e-06	0.119635	0.922709	0.878266	0.515467	0.640117	g50106	tumor protein p53-inducible nuclear protein 2
clu_8929_NA	scaffold2129:6337953-6340670	0.379692	1.87e-06	0.601784	0.907549	0.888437	0.978768	0.973872	g5947
clu_8929_NA	scaffold2129:6338015-6340670	0.379692	1.87e-06	0.402388	0.0964094	0.112611	0.0219054	0.0276983	g5947
clu_9422_NA	scaffold8331:7103354-7113520	0.346601	1.95e-06	0	0.378816	0.362601	0.185821	0.0157993	g3629
clu_9422_NA	scaffold8331:7103354-7106030	0.270246	1.95e-06	0	0.541927	0.469492	0.61466	0.739039	g3629
clu_4373_NA	scaffold6331-2:1145022-1151732	0.326281	1.98e-06	0	1	1	0.926027	0.674616	g37865
clu_4373_NA	scaffold6331-2:1145022-1151789	0.326281	1.98e-06	0	1.18e-06	5.77e-09	0.0743656	0.326281	g37865
clu_2146_NA	scaffold2280-1:745054-750610	0.857969	2e-06	0.142045	1	1	1	0	g9027	dynactin subunit 3-like
clu_2146_NA	scaffold2280-1:745054-753910	0.857969	2e-06	0.857969	4.08e-13	6.5e-10	3.05e-82	0	g9027	dynactin subunit 3-like
clu_9945_NA	scaffold328:2109483-2114697	0.580187	2.01e-06	0	1	0	0.419812	0	g26268	transcription elongation regulator 1-like isoform X3
clu_9945_NA	scaffold328:2109483-2110959	0.313138	2.01e-06	0	2.47e-07	0	0.313138	0	g26268	transcription elongation regulator 1-like isoform X3
clu_9945_NA	scaffold328:2110982-2114697	0.267049	2.01e-06	0	2.51e-07	0	0.267049	0	g26268	transcription elongation regulator 1-like isoform X3
clu_5314_NA	scaffold11450:402951-410546	0.237634	2.02e-06	0.910039	0.850045	0.698517	0.673281	0	g12739
clu_5314_NA	scaffold11450:409777-410546	0.237634	2.02e-06	0.0900537	0.157186	0.301512	0.327596	0	g12739
clu_11534_NA	scaffold2204-2:904245-911509	0.234425	2.03e-06	0.375031	0	0	0.140606	0.174026	g6250
clu_620_NA	scaffold7527-3:55655-110318	0.672002	2.08e-06	0.140069	0	0	0.346045	0.812072	g39166	polyprotein
clu_620_NA	scaffold7527-3:58234-110318	0.543523	2.08e-06	0.695522	0	0	0.50693	0.151998	g39166	polyprotein
clu_9251_NA	scaffold8412:151918-152207	0.520177	2.12e-06	0	0	0.475093	0.906144	0.99527	g4024	cytochrome P450 2J6
clu_9251_NA	scaffold8412:151918-175124	0.520177	2.12e-06	0	0	0.528917	0.112231	0.00495065	g4024	cytochrome P450 2J6
clu_8554_NA	scaffold2589:475584-488645	0.401431	2.2e-06	0.901062	0.571132	0	0.980945	0
clu_8554_NA	scaffold2589:475986-488645	0.323959	2.2e-06	0.0989754	0.35251	0	0.0239562	0
clu_1110_NA	scaffold1746-11:441629-472754	0.384867	2.28e-06	0	0.409532	0	0.795987	0.542111	g46262,g46261
clu_1110_NA	scaffold1746-11:471909-472754	0.368276	2.28e-06	0	0.590468	0	0.204371	0.468765	g46262,g46261
clu_4205_NA	scaffold3746:8259588-8266437	0.463031	2.32e-06	0.495398	0.96179	0.952612	0.957458	0.98599	g14189	mannose-1-phosphate guanyltransferase alpha-like isoform X1
clu_4205_NA	scaffold3746:8259588-8263160	0.342854	2.32e-06	0.3783	0.0384194	0.0499897	0.0435227	0.0348391	g14189	mannose-1-phosphate guanyltransferase alpha-like isoform X1
clu_2361_NA	scaffold35500:58320-84743	0.289848	2.38e-06	0	0.911012	0.948922	0.659074	0	g31631
clu_5700_NA	scaffold557-7:11235050-11241077	0.580633	2.48e-06	0.303716	0.647185	0.852737	0.880604	0	g29448	cell division cycle-associated 7-like protein isoform 1
clu_5700_NA	scaffold557-7:11235090-11241077	0.361196	2.48e-06	0.435619	0.356219	0.16795	0.11978	0	g29448	cell division cycle-associated 7-like protein isoform 1
clu_5700_NA	scaffold557-7:11234692-11241077	0.333755	2.48e-06	0.333755	7.22e-10	0.0571832	0.0452134	0	g29448	cell division cycle-associated 7-like protein isoform 1
clu_345_NA	scaffold2266-1:7393239-7394973	0.314569	2.49e-06	0	0.922638	0.984787	0.755881	0.671854	g8799
clu_9687_NA	scaffold78-1426:5552749-5577786	0.287834	2.61e-06	0	1	0.999997	0.802012	0.712636	g27635
clu_6064_NA	scaffold328433:7913-8841	0.319614	2.61e-06	0	0.945932	0.917953	0.745105	0.62612	g47945
clu_6064_NA	scaffold328433:8042-8841	0.319614	2.61e-06	0	0.0554488	0.084387	0.256073	0.375063	g47945
clu_9156_NA	scaffold5672-1:880674-968817	0.337811	2.63e-06	0	1	0	0.662189	0	g24384
clu_9156_NA	scaffold5672-1:928553-968817	0.337811	2.63e-06	0	4.57e-09	0	0.337811	0	g24384
clu_2781_NA	scaffold8689:3420705-3435234	0.487118	2.64e-06	0	0	0.0452854	0.244555	0.537569	g2463	CAP, isoform R
clu_2781_NA	scaffold8689:3427743-3435234	0.279827	2.64e-06	0	0	0.556696	0.418842	0.268613	g2463	CAP, isoform R
clu_3845_NA	scaffold6075-1:1853094-1883755	0.772159	2.65e-06	0.213725	0.788978	0.921512	0.972396	0.989557	g20208	Uridine-cytidine kinase, isoform D
clu_3845_NA	scaffold6075-1:1862556-1883755	0.772159	2.65e-06	0.786498	0.217074	0.0885351	0.0331576	0.0143392	g20208	Uridine-cytidine kinase, isoform D
clu_3732_NA	scaffold2254:30980-33502	0.314528	2.75e-06	0	0.479691	0.411581	0.163749	0.245297	g6707	kinesin-like protein KIF21A isoform 3
clu_2993_NA	scaffold53060:1990879-2027984	0.472086	2.87e-06	0.839757	0.981438	0.842364	0.72976	0.508636	g30481	apoptotic chromatin condensation inducer in the nucleus isoform 3
clu_2993_NA	scaffold53060:1990879-1998413	0.376703	2.87e-06	0.0702221	0.0164285	0.120253	0.268184	0.400615	g30481	apoptotic chromatin condensation inducer in the nucleus isoform 3
clu_1214_NA	scaffold46-16:5184115-5185435	0.399759	2.94e-06	0.600235	0	0	0.999994	0	g27220
clu_1214_NA	scaffold46-16:5182605-5183968	0.211075	2.94e-06	0.211078	0	0	3.18e-06	0	g27220
clu_9883_NA	scaffold49156:324726-365726	0.367311	3.02e-06	0.229499	0.189848	0.26022	0.424359	0.561447	g32772,g32771	chromatin modification-related protein EAF1-like
clu_9883_NA	scaffold49156:324726-384895	0.364113	3.02e-06	0.774212	0.8031	0.73978	0.578016	0.446635	g32772,g32771	chromatin modification-related protein EAF1-like
clu_7267_NA	scaffold3220:161316-165633	0.271532	3.24e-06	0.994602	0.98332	0.886419	0.793523	0.723424	g15816
clu_7267_NA	scaffold3220:161316-165654	0.271532	3.24e-06	0.00546891	0.0167111	0.115039	0.207178	0.277669	g15816
clu_9124_NA	scaffold867:3131873-3134157	0.611803	3.24e-06	0	0	1	0.942508	0.388197	g44161	intracellular protein transport protein USO1-like isoform X2
clu_9124_NA	scaffold867:3131873-3134934	0.611803	3.24e-06	0	0	3.84e-10	0.0574918	0.611815	g44161	intracellular protein transport protein USO1-like isoform X2
clu_5507_NA	scaffold71507:8214093-8215818	0.221819	3.29e-06	0	0.838757	0.776201	0.939135	0.990149	g49394
clu_5321_NA	scaffold11450:626585-706075	0.206108	3.44e-06	0	2.82e-08	3.64e-08	0.21707	0.0714565	g12742
clu_5321_NA	scaffold11450:673371-706075	0.206108	3.44e-06	0	1	1	0.793905	0.929975	g12742
clu_9385_NA	scaffold2968:6392651-6412903	0.257285	3.48e-06	0.999998	0.999998	0.999998	0.742773	0.968091	g18782
clu_7399_NA	scaffold60966:857532-863953	0.352841	3.6e-06	0.357373	0.586299	0.677223	0.703978	0.579177	g31035
clu_7399_NA	scaffold60966:857565-863953	0.352841	3.6e-06	0.648923	0.41452	0.323047	0.296307	0.421411	g31035
clu_5367_NA	scaffold1198-20:863802-876227	0.471735	3.65e-06	0.190482	0.60693	0.663678	0.618902	0	g42239	sidekick, isoform H
clu_5367_NA	scaffold1198-20:863802-874194	0.268063	3.65e-06	0.452501	0.217458	0.17245	0.213828	0	g42239	sidekick, isoform H
clu_5367_NA	scaffold1198-20:874220-876227	0.222286	3.65e-06	0.364955	0.161167	0.142669	0.161078	0	g42239	sidekick, isoform H
clu_1602_NA	scaffold8159:541520-548827	0.263377	3.65e-06	0	0.738473	0	0.944528	0.989657	g36106
clu_1602_NA	scaffold8159:541520-548796	0.215809	3.65e-06	0	0.224284	0	0.0554723	0.0135097	g36106
clu_4328_NA	scaffold2683:120588-163046	0.413206	3.68e-06	0	0	0	0.0575523	0.470759	g10659	troponin C at 41C, isoform B
clu_4328_NA	scaffold2683:121306-163046	0.413206	3.68e-06	0	0	0	0.942448	0.529241	g10659	troponin C at 41C, isoform B
clu_12133_NA	scaffold12968:80253-84232	0.426237	3.76e-06	0.418814	0.515658	0.844459	0	0	g28392
clu_12133_NA	scaffold12968:83903-84232	0.226355	3.76e-06	0.308995	0.302228	0.0824061	0	0	g28392
clu_12133_NA	scaffold12968:80253-83814	0.202456	3.76e-06	0.27701	0.18629	0.0838442	0	0	g28392
clu_7988_NA	scaffold7298-2:624091-625502	0.505266	3.98e-06	0.10007	0.337897	0.605336	0	0	g40614	Niemann-Pick C1 protein
clu_7988_NA	scaffold7298-2:624091-626018	0.389618	3.98e-06	0.71825	0.347042	0.304331	0	0	g40614	Niemann-Pick C1 protein
clu_4077_NA	scaffold9842:4506505-4509719	0.556473	4.16e-06	0.874361	0.456194	0.431602	0.32002	0.314626	g2057	protein LSM14 homolog A isoform e
clu_4077_NA	scaffold9842:4506505-4509563	0.471704	4.16e-06	0.130439	0.451324	0.438399	0.584915	0.548598	g2057	protein LSM14 homolog A isoform e
clu_4050_NA	scaffold9716:1005521-1012410	0.426224	4.25e-06	0.294702	0.563101	0.720423	0.646104	0.650264	g1686
clu_4050_NA	scaffold9716:1009245-1012410	0.232684	4.25e-06	0.385196	0.207138	0.165038	0.178519	0.195371	g1686
clu_1846_NA	scaffold828:23570-24652	0.222384	4.38e-06	0	0.577064	0.516164	0.674201	0.739664
clu_1846_NA	scaffold828:23606-24652	0.222384	4.38e-06	0	0.425088	0.485552	0.327129	0.262158
clu_11159_NA	scaffold7853:129449-131695	0.309784	4.48e-06	0	0.504333	0.430404	0.195366	0	g36514	beta-glucuronidase-like isoform X1
clu_11159_NA	scaffold7853:130282-131695	0.200632	4.48e-06	0	0.0702576	0.19206	0.263368	0	g36514	beta-glucuronidase-like isoform X1
clu_11394_NA	scaffold2682:54018-54727	0.814721	4.69e-06	0.188409	0.999268	0.999998	0.999999	0	g10657	even-skipped, partial
clu_11394_NA	scaffold2682:23452-54727	0.693514	4.69e-06	0.694138	0.000623139	2.02e-06	8.67e-07	0	g10657	even-skipped, partial
clu_6013_NA	scaffold8220-1:165119-172156	0.448583	4.72e-06	0	0.539081	0.676592	0.55984	0.227497	g3487	EF-hand calcium-binding domain-containing protein 7-like
clu_6013_NA	scaffold8220-1:165119-174408	0.339606	4.72e-06	0	0.0799622	0.0858751	0.133076	0.418799	g3487	EF-hand calcium-binding domain-containing protein 7-like
clu_11562_NA	scaffold1177:169540-172727	0.645907	4.73e-06	0.309026	0.917305	0.781544	0.65588	0	g43174	DET1- and DDB1-associated protein 1-like
clu_11562_NA	scaffold1177:169540-172592	0.645118	4.73e-06	0.707513	0.0623951	0.225046	0.394842	0	g43174	DET1- and DDB1-associated protein 1-like
clu_838_NA	scaffold6853:8915187-8925704	0.334951	4.78e-06	0.625429	0.920072	0.960588	0.92028	0.89014	g36882
clu_838_NA	scaffold6853:8919800-8925704	0.334951	4.78e-06	0.381379	0.0802764	0.0402272	0.0797895	0.122618	g36882
clu_6892_NA	scaffold2515:139516-139746	0.40224	4.88e-06	0.624557	0.262532	0.219325	0.236597	0.307119	g10129
clu_6892_NA	scaffold2515:139516-139761	0.40224	4.88e-06	0.385801	0.740042	0.782878	0.765958	0.693946	g10129
clu_8671_NA	scaffold706478:3757-4371	0.382622	4.96e-06	0.600504	0	0	0.983126	0
clu_5948_NA	scaffold6436:3265142-3346845	0.25668	5.45e-06	0	0.0035094	0.0212033	0.260999	0.237194	g38296
clu_5948_NA	scaffold6436:3300088-3346845	0.25668	5.45e-06	0	0.996492	0.980363	0.739812	0.765433	g38296
clu_8969_NA	scaffold150549:39785-46637	0.204028	5.88e-06	0.0353104	0.139638	0.121931	0.141644	0.239063
clu_8969_NA	scaffold150549:39785-46607	0.20152	5.88e-06	0.959016	0.856307	0.879611	0.861362	0.766304
clu_2207_NA	scaffold1366:607367-631582	0.431138	6.04e-06	0.663812	0	0	0	0.232674	g42017,g42018
clu_2207_NA	scaffold1366:607367-624321	0.25072	6.04e-06	0.0887715	0	0	0	0.339492	g42017,g42018
clu_11499_NA	scaffold3032-1:191060-195232	0.436071	6.06e-06	0.713645	0.599121	0.499832	0.305912	0.278491	g18328	DIS3-like exonuclease 2 isoform X7
clu_11499_NA	scaffold3032-1:191070-195232	0.436071	6.06e-06	0.286717	0.407066	0.501054	0.695361	0.722641	g18328	DIS3-like exonuclease 2 isoform X7
clu_5574_NA	scaffold1150-1:5480014-5483976	0.37415	6.11e-06	0.64547	0.43735	0.446532	0.399371	0.280838	g42822,g42823
clu_5574_NA	scaffold1150-1:5484127-5512002	0.215324	6.11e-06	0.189442	0.323902	0.393898	0.306257	0.239988	g42822,g42823
clu_5574_NA	scaffold1150-1:5480014-5488014	0.204043	6.11e-06	0.100812	0.127547	0.0899731	0.147643	0.298424	g42822,g42823
clu_3074_NA	scaffold6954:1259917-1260814	0.644939	6.13e-06	0	0.13881	0.323868	0.714623	0.782499	g40868	PREDICTED: ephrin type-A receptor 4-B isoform X4
clu_3074_NA	scaffold6954:1259917-1260817	0.644939	6.13e-06	0	0.862688	0.679421	0.289072	0.223602	g40868	PREDICTED: ephrin type-A receptor 4-B isoform X4
clu_11371_NA	scaffold4633-1:1895448-1895692	0.390831	6.64e-06	0.3992	0.795077	0.770934	0.745243	0.592011	g22022
clu_11371_NA	scaffold4633-1:1895463-1895692	0.390831	6.64e-06	0.605047	0.210278	0.234386	0.255098	0.415058	g22022
clu_621_NA	scaffold7527-3:505648-539995	0.244357	6.73e-06	0	0.288248	0.170567	0.0409264	0
clu_621_NA	scaffold7527-3:505648-581748	0.222937	6.73e-06	0	0.55069	0.595593	0.772512	0
clu_10623_NA	scaffold8777-1:3246056-3267332	0.286387	6.84e-06	0.000693122	1.17e-07	0	0.0779042	0.290827	g2616
clu_10623_NA	scaffold8777-1:3245224-3252954	0.244908	6.84e-06	0.341961	0.515232	0	0.384926	0.331527	g2616
clu_7250_NA	scaffold11387:280160-283858	0.225619	7.03e-06	0.302097	0.320387	0.442038	0.412904	0	g12657
clu_10909_NA	scaffold244:984546-1009421	0.416704	7.29e-06	0	1.02e-07	0.271436	0.444622	0.472576
clu_10909_NA	scaffold244:984546-995263	0.416704	7.29e-06	0	1	0.843555	0.583296	0.625947
clu_10802_NA	scaffold6822-4:3604444-3632699	0.313491	7.46e-06	5.97e-05	0.148372	0.308034	0.314767	0.280235	g37625
clu_10802_NA	scaffold6822-4:3604444-3619545	0.20366	7.46e-06	0.571844	0.487028	0.348004	0.314079	0.363869	g37625
clu_5015_NA	scaffold6377-1:2986962-2992129	0.494679	7.55e-06	0	0	0	0.438712	0.933391	g38195	tropomyosin 1, isoform E
clu_5015_NA	scaffold6377-1:2987884-2992129	0.457726	7.55e-06	0	0	0	0.519359	0.0616332	g38195	tropomyosin 1, isoform E
clu_9708_NA	scaffold78-1426:10259386-10306973	0.436822	7.6e-06	0.993481	0.710913	0.808513	0.565975	0	g27673
clu_9708_NA	scaffold78-1426:10271758-10306973	0.436822	7.6e-06	0.00663732	0.289771	0.200171	0.443453	0	g27673
clu_5989_NA	scaffold2417-4:504661-511065	0.359761	7.71e-06	0.584268	0.93548	0.89062	0.686346	0.684728	g8234
clu_5989_NA	scaffold2417-4:504661-507409	0.225991	7.71e-06	0.248144	0.0433119	0.0684175	0.177868	0.268169	g8234
clu_7660_NA	scaffold1220146:8815-12205	0.440548	7.71e-06	0	0.101355	0.302626	0.540163	0.536646
clu_7660_NA	scaffold1220146:8824-12205	0.440548	7.71e-06	0	0.901089	0.71165	0.460702	0.468911
clu_6237_NA	scaffold512-5:1397689-1402546	0.504389	7.87e-06	0.829884	0	0.704339	0.999999	0.455929
clu_6237_NA	scaffold512-5:1382467-1402546	0.457658	7.87e-06	0.00602965	0	1.02e-06	0.0395591	0.459242
clu_6237_NA	scaffold512-5:1395517-1402546	0.325426	7.87e-06	0.170116	0	0.325427	0.000122993	0.160349
clu_991_NA	scaffold96:424051-424219	0.298634	7.93e-06	0	0.469614	0.370797	0.306925	0.173881	g27845
clu_10508_NA	scaffold297628:450-17497	0.588227	7.97e-06	0.0890791	0.672746	0.674725	0	0	g47845
clu_10508_NA	scaffold297628:450-17199	0.295134	7.97e-06	0.459053	0.140205	0.203836	0	0	g47845
clu_10508_NA	scaffold297628:450-17176	0.251595	7.97e-06	0.391567	0.139972	0.107104	0	0	g47845
clu_9339_NA	scaffold53059:19818-25444	0.520071	8.31e-06	0	0.180192	0.448041	0.744193	0.714988	g30436	alkaline phosphatase 6
clu_9339_NA	scaffold53059:19818-25382	0.450569	8.31e-06	0	0.72686	0.534706	0.289687	0.394043	g30436	alkaline phosphatase 6
clu_11081_NA	scaffold2279:334783-341309	0.278193	8.36e-06	0	0.695749	0.694543	0.839042	0.560849	g9011
clu_8732_NA	scaffold3743-3:59517-63918	0.371287	8.67e-06	0.156404	0.52769	0	0	0	g14107
clu_8732_NA	scaffold3743-3:63771-63918	0.303641	8.67e-06	0.584008	0.280367	0	0	0	g14107
clu_223_NA	scaffold614740:12261-20886	0.254163	8.69e-06	0	0	0.0204332	0.276429	0.215488
clu_876_NA	scaffold6239-16:5816378-5818742	0.486229	8.71e-06	0	0.724895	0.894456	0.82001	0.408166	g38862	transmembrane protein 114
clu_876_NA	scaffold6239-16:5816378-5820367	0.486229	8.71e-06	0	0.276672	0.105719	0.188168	0.592359	g38862	transmembrane protein 114
clu_8071_NA	scaffold148811:26243-29468	0.218613	8.74e-06	1.61e-06	0	0.240348	0.188324	0.20176
clu_3292_NA	scaffold48991-2:288529-291850	0.262098	9.5e-06	1	1	1	0.737922	0.903588
clu_3292_NA	scaffold48991-2:288529-293924	0.262098	9.5e-06	1.11e-08	6.66e-09	7.3e-09	0.264873	0.0964951
clu_7169_NA	scaffold2431:436942-438597	0.70131	9.67e-06	0	0	0.13048	0.541011	0.831789	g8565	ephexin-1-like isoform X1
clu_7169_NA	scaffold2431:436942-529274	0.70131	9.67e-06	0	0	0.871475	0.460242	0.169691	g8565	ephexin-1-like isoform X1
clu_3073_NA	scaffold6954:1254677-1258324	0.249323	9.73e-06	0	0.0539629	0.0931652	0.142425	0.303424	g40868	PREDICTED: ephrin type-A receptor 4-B isoform X4
clu_10608_NA	scaffold6462-2:3448409-3450100	0.667175	9.82e-06	0.329401	0.996575	0.983964	0.989459	0	g38388	M-phase inducer phosphatase-like isoform X1
clu_10608_NA	scaffold6462-2:3441936-3450100	0.376425	9.82e-06	0.379849	0.00342467	0.00858697	0.00507978	0	g38388	M-phase inducer phosphatase-like isoform X1
clu_10608_NA	scaffold6462-2:3447743-3450100	0.342149	9.82e-06	0.347611	9.54e-11	0.0160363	0.0108214	0	g38388	M-phase inducer phosphatase-like isoform X1
clu_2811_NA	scaffold6476:24320-29902	0.319504	9.87e-06	0	0	0	0.928694	0.60919	g37336
clu_2811_NA	scaffold6476:24320-29130	0.204405	9.87e-06	0	0	0	0.0558834	0.260289	g37336
clu_7481_NA	scaffold315905:295-4175	0.248064	1.02e-05	0	0.716477	0.739818	0.797238	0.964212
clu_7481_NA	scaffold315905:432-4175	0.248064	1.02e-05	0	0.283853	0.261422	0.202813	0.0359732
clu_2972_NA	scaffold53060:73265-77974	0.597471	1.05e-05	0	0.253571	0.424654	0.752285	0.847653	g30442	60S ribosomal protein L27
clu_2972_NA	scaffold53060:73327-77974	0.53668	1.05e-05	0	0.674591	0.505458	0.225888	0.147444	g30442	60S ribosomal protein L27
clu_3315_NA	scaffold321:1017339-1022558	0.230173	1.08e-05	0.795732	0.995905	0.995351	0.998317	0.997687	g26214
clu_7156_NA	scaffold8347-11:6101650-6109748	0.380698	1.09e-05	0	0	0.103642	0.281135	0.484087	g3745
clu_7156_NA	scaffold8347-11:6101665-6109748	0.380698	1.09e-05	0	0	0.896611	0.720033	0.516766	g3745
clu_3334_NA	scaffold3790-12:437971-442234	0.205895	1.09e-05	0	0.0132219	0.00508878	0.109675	0.212463	g13158
clu_3334_NA	scaffold3790-12:438100-442234	0.201226	1.09e-05	0	0.98809	0.972347	0.890325	0.787559	g13158
clu_1959_NA	scaffold479468:488-13332	0.297926	1.09e-05	0	0.801065	0.830683	0.567364	0.534853	g47612
clu_3343_NA	scaffold3790-12:2489548-2505090	0.283361	1.11e-05	0	0.195914	0.121911	0.401975	0	g13180
clu_3343_NA	scaffold3790-12:2489548-2501682	0.241239	1.11e-05	0	0.300135	0.362849	0.12161	0	g13180
clu_9604_NA	scaffold10306:16298-22951	0.224364	1.15e-05	0.988171	0.958637	0.976331	0.89702	0.795628	g1066
clu_6_NA	scaffold11942:22387-27470	0.395906	1.16e-05	0	0	0	0.372888	0.768794	g29541
clu_6_NA	scaffold11942:22387-28181	0.330712	1.16e-05	0	0	0	0.508025	0.177314	g29541
clu_3646_NA	scaffold73:85388-90757	0.279135	1.18e-05	0.654408	0.813141	0.864886	0.91886	0.893901	g27471
clu_3646_NA	scaffold73:85388-90675	0.252774	1.18e-05	0.353775	0.190264	0.140545	0.0827086	0.111738	g27471
clu_11802_NA	scaffold24409-1:509318-519471	0.774024	1.24e-05	1	0	0	0.225976	0	g34039	probable thiopurine S-methyltransferase
clu_11802_NA	scaffold24409-1:516590-519471	0.774024	1.24e-05	1.13e-07	0	0	0.774024	0	g34039	probable thiopurine S-methyltransferase
clu_9121_NA	scaffold867:2275669-2280126	0.337674	1.28e-05	0	0	0.89861	0.561713	0.669099	g44150
clu_9121_NA	scaffold867:2278165-2280126	0.259098	1.28e-05	0	0	0.0748633	0.334001	0.197181	g44150
clu_2029_NA	scaffold8366-2:1310707-1315858	0.303073	1.29e-05	0.974104	0.741154	0.708717	0.67607	0.745041	g3857
clu_2029_NA	scaffold8366-2:1310858-1315858	0.303073	1.29e-05	0.0270193	0.259824	0.293789	0.329079	0.260543	g3857
clu_10971_NA	scaffold4421:2479258-2573364	0.488185	1.34e-05	0	0	0	0.892117	0.403933
clu_10971_NA	scaffold4421:2450547-2513423	0.380621	1.34e-05	0	0	0	0.0265904	0.407211
clu_12161_NA	scaffold11691:320413-371176	0.630155	1.37e-05	0	0.935068	0.937093	0.300789	0.426981	g12141	talin-1-like
clu_12161_NA	scaffold11691:327384-371176	0.444904	1.37e-05	0	0.00439917	0.0123921	0.456252	0.289973	g12141	talin-1-like
clu_12161_NA	scaffold11691:340407-371176	0.229183	1.37e-05	0	0.0649321	0.0655657	0.265809	0.309007	g12141	talin-1-like
clu_8269_NA	scaffold366-1:713733-720205	0.259833	1.38e-05	0.834034	0.922287	0.684054	0.735917	0.701215	g28590
clu_777_NA	scaffold220156:6801-8241	0.223226	1.45e-05	0.467207	0.468647	0.549367	0.467342	0.327161
clu_777_NA	scaffold220156:6817-8241	0.223226	1.45e-05	0.533454	0.531411	0.451411	0.533002	0.674777
clu_6785_NA	scaffold4338-4:697062-706041	0.215873	1.51e-05	0	0.330825	0.248045	0.181743	0.40365	g20620
clu_8966_NA	scaffold9627:1152738-1207953	0.967653	1.55e-05	0.967653	0	3.23e-35	1.02e-23	0	g1350	protein escargot-like
clu_8966_NA	scaffold9627:1206683-1207953	0.967653	1.55e-05	0.0323475	0	1	1	0	g1350	protein escargot-like
clu_3705_NA	scaffold5883-7:1164469-1248561	0.279585	1.59e-05	0	0	0	0.0246018	0.304187	g19882
clu_1496_NA	scaffold3435-7:2770869-2796499	0.38247	1.64e-05	0.888892	0.80523	0.760955	0.827224	0.502147	g15571
clu_1496_NA	scaffold3435-7:2792139-2796499	0.38247	1.64e-05	0.119325	0.195271	0.241288	0.174931	0.497944	g15571
clu_3847_NA	scaffold6075-1:2022077-2027735	0.371584	1.65e-05	0	0.30529	0.518242	0.676874	0	g20209
clu_3847_NA	scaffold6075-1:2022077-2025375	0.366309	1.65e-05	0	0.586309	0.299562	0.219062	0	g20209
clu_8643_NA	scaffold943:513896-531844	0.412734	1.66e-05	0.130313	0.371312	0.346635	0.543048	0	g43367
clu_8643_NA	scaffold943:513896-522203	0.246962	1.66e-05	0.489361	0.242399	0.283111	0.251892	0	g43367
clu_3657_NA	scaffold2784-4:2977628-2989696	0.951192	1.67e-05	1.88e-09	0.951192	0	0	0	g18038
clu_3657_NA	scaffold2784-4:2977628-3004524	0.951192	1.67e-05	1	0.0488081	0	0	0	g18038
clu_11637_NA	scaffold10274:29923-109111	0.39676	1.7e-05	0.570669	0.430931	0.477122	0.508458	0.167926	g1015	WD repeat and SOCS box-containing protein 1-like isoform X2
clu_11637_NA	scaffold10274:29923-37940	0.39676	1.7e-05	0.435314	0.590375	0.528214	0.517979	0.835681	g1015	WD repeat and SOCS box-containing protein 1-like isoform X2
clu_9126_NA	scaffold867:3139289-3147385	0.481158	1.78e-05	0	0	0.0709593	0.195178	0.552118	g44161	intracellular protein transport protein USO1-like isoform X2
clu_9126_NA	scaffold867:3144209-3147400	0.211875	1.78e-05	0	0	0.414671	0.367849	0.182259	g44161	intracellular protein transport protein USO1-like isoform X2
clu_3856_NA	scaffold10117:262850-264478	0.335038	1.79e-05	0.644229	0	0	0.309191	0	g704
clu_3856_NA	scaffold10117:262850-272007	0.335038	1.79e-05	0.355771	0	0	0.690809	0	g704
clu_4432_NA	scaffold11141:656726-656948	0.209487	1.81e-05	0	0	0.000724783	0.180455	0.210212	g10874,g10875
clu_2004_NA	scaffold892-2:38730-42936	0.228165	1.81e-05	0.77189	1	0.993971	1	0	g44339
clu_2004_NA	scaffold892-2:38730-49643	0.228165	1.81e-05	0.228165	2.5e-08	0.00602934	3.81e-09	0	g44339
clu_1196_NA	scaffold46-16:1603992-1608014	0.328534	1.83e-05	0	0.330168	0.168895	0.202879	0.49626	g27171
clu_1196_NA	scaffold46-16:1605617-1608014	0.328534	1.83e-05	0	0.685023	0.833346	0.806541	0.50819	g27171
clu_419_NA	scaffold4502:2119754-2121928	0.56224	1.89e-05	0	0.999969	0	0	0.437729
clu_419_NA	scaffold4502:2121429-2121928	0.341587	1.89e-05	0	2.87e-05	0	0	0.341616
clu_419_NA	scaffold4502:2119754-2121412	0.220653	1.89e-05	0	2.74e-06	0	0	0.220656
clu_9016_NA	scaffold985337:40923-42045	0.365852	1.98e-05	0	0.895124	0.883823	0.561722	0.52902
clu_9016_NA	scaffold985337:40923-42084	0.365852	1.98e-05	0	0.105128	0.116675	0.438975	0.47203
clu_1263_NA	scaffold368-1:2601098-2602595	0.905422	1.99e-05	0.0945781	0.996351	1	0.993926	0	g28692	predicted protein
clu_1263_NA	scaffold368-1:2601098-2604860	0.905422	1.99e-05	0.905615	0.00364913	3.08e-73	0.00607363	0	g28692	predicted protein
clu_2402_NA	scaffold628-14:1242757-1247555	0.200217	2.03e-05	0	0	0.877007	0.908093	0.707715
clu_9614_NA	scaffold10306:1464570-1487852	0.400457	2.07e-05	0.51719	0	0	0.917647	0	g1082
clu_9614_NA	scaffold10306:1464570-1480139	0.400457	2.07e-05	0.48281	0	0	0.0823531	0	g1082
clu_10616_NA	scaffold6462-2:3904477-3910556	0.991123	2.09e-05	0	0.0124282	4.18e-10	0.991123	0	g38403	2-acylglycerol O-acyltransferase 2-A-like
clu_10616_NA	scaffold6462-2:3904477-3916726	0.991123	2.09e-05	0	0.987572	1	0.00887786	0	g38403	2-acylglycerol O-acyltransferase 2-A-like
clu_3857_NA	scaffold10117:264611-280268	0.38234	2.11e-05	0.646873	0	0	0.264026	0.287203	g704
clu_3857_NA	scaffold10117:272140-280268	0.38234	2.11e-05	0.353633	0	0	0.746168	0.724283	g704
clu_4197_NA	scaffold3746:5613125-5631584	0.375639	2.15e-05	0.24441	0.453197	0.395246	0.354781	0.14905	g14167
clu_4197_NA	scaffold3746:5613125-5630990	0.288561	2.15e-05	0.832837	0.599185	0.614545	0.681172	0.848229	g14167
clu_5873_NA	scaffold270:2859263-2859555	0.208145	2.16e-05	0	0	4.05e-05	0.210144	0.207884	g25546
clu_8381_NA	scaffold7477-4:2649427-2661863	0.23561	2.17e-05	0.481943	0.504453	0.422482	0.650925	0.633039	g39992,g39991
clu_8381_NA	scaffold7477-4:2655931-2661863	0.210937	2.17e-05	0.309937	0.302499	0.328535	0.136735	0.114683	g39992,g39991
clu_7271_NA	scaffold11178:470851-496529	0.257789	2.34e-05	0.508347	0.409455	0.365558	0.307516	0.233055	g11212,g11211
clu_4327_NA	scaffold2683:117725-120561	0.452846	2.35e-05	0	0	0	0.0608191	0.513665	g10659	troponin C at 41C, isoform B
clu_4327_NA	scaffold2683:117725-121279	0.452846	2.35e-05	0	0	0	0.939181	0.486335	g10659	troponin C at 41C, isoform B
clu_3093_NA	scaffold6098-5:323861-326735	0.341987	2.48e-05	0.587279	0.244612	0.293208	0.347833	0.416696	g20296
clu_3093_NA	scaffold6098-5:323849-326735	0.331003	2.48e-05	0.400385	0.732821	0.685614	0.636099	0.564584	g20296
clu_4953_NA	scaffold35795:12060106-12066197	0.427227	2.48e-05	0.832147	0.622269	0.677884	0.485543	0.406952
clu_4953_NA	scaffold35795:12060106-12066212	0.427227	2.48e-05	0.170812	0.379127	0.323116	0.5147	0.59508
clu_1150_NA	scaffold2344:1338723-1340034	0.418173	2.5e-05	0	0	0.54494	0.479303	0.886127	g9715
clu_1150_NA	scaffold2344:1339748-1340034	0.418173	2.5e-05	0	0	0.457339	0.532161	0.113988	g9715
clu_9816_NA	scaffold756-9:3087840-3091880	0.404951	2.58e-05	0	0.995547	0.966327	0.590693	0.618608	g44524
clu_9816_NA	scaffold756-9:3088314-3091880	0.404951	2.58e-05	0	0.00447725	0.0340774	0.41081	0.385321	g44524
clu_7948_NA	scaffold18551:1940839-1942716	0.576057	2.61e-05	0.576067	0.499843	9.92e-06	0	0
clu_7948_NA	scaffold18551:1939180-1944259	0.379636	2.61e-05	0.0261464	0.245067	0.476816	0	0
clu_11216_NA	scaffold6858:69405-93016	0.317986	2.64e-05	0	0.883183	0.786874	0.783834	0.565197	g36907
clu_11216_NA	scaffold6858:69405-93514	0.317986	2.64e-05	0	0.11683	0.213237	0.216499	0.434906	g36907
clu_9833_NA	scaffold756-9:5873227-5875103	0.246149	2.66e-05	0.205731	0.384704	0.190536	0.152294	0.141227	g44562
clu_11962_NA	scaffold14381-33:2050632-2067220	0.226624	2.68e-05	0.425113	0.483057	0.39635	0.256243	0.36282	g35317
clu_10739_NA	scaffold181483:1621-10840	0.451349	2.75e-05	0.272647	0.480206	0.48887	0.673672	0.737102
clu_10739_NA	scaffold181483:1727-10840	0.268938	2.75e-05	0.442036	0.39423	0.385389	0.243884	0.194391
clu_11308_NA	scaffold13580-205:4174777-4179585	0.219084	2.79e-05	0.0140559	0.0773677	0.122555	0.234812	0	g14408
clu_1666_NA	scaffold16:3686524-3700863	0.366055	2.9e-05	0	0.889514	0	0.522062	0.523459	g26503
clu_1666_NA	scaffold16:3700161-3700863	0.252832	2.9e-05	0	0.0635998	0	0.235497	0.316432	g26503
clu_4990_NA	scaffold10272:1716771-1766926	0.349145	2.92e-05	0.43657	0.466259	0.61486	0.46561	0.515347	g981
clu_4990_NA	scaffold10272:1716771-1766847	0.283052	2.92e-05	0.626935	0.521028	0.34347	0.49913	0.511926	g981
clu_11133_NA	scaffold7885:1559446-1620248	0.287952	2.95e-05	0	0	0.67167	0.406312	0.550797	g36550
clu_11133_NA	scaffold7885:1592028-1620248	0.229467	2.95e-05	0	0	0.00027314	0.22974	0.121225	g36550
clu_10547_NA	scaffold758-1:1386687-1408367	0.545471	2.99e-05	0.940705	0.751673	0.745837	0.602853	0.420058
clu_10547_NA	scaffold758-1:1386687-1394314	0.276156	2.99e-05	0.0418089	0.110899	0.110735	0.183966	0.309902
clu_10547_NA	scaffold758-1:1394352-1408367	0.242215	2.99e-05	0.0201904	0.0712167	0.105915	0.150244	0.259431
clu_11506_NA	scaffold355220:15840-18608	0.318781	3.08e-05	0.602422	0.781334	0.722709	0.485342	0.46217
clu_11506_NA	scaffold355220:15840-18650	0.318781	3.08e-05	0.400217	0.219077	0.280406	0.519346	0.539869
clu_12148_NA	scaffold36765:394674-400753	0.889862	3.09e-05	0.110153	1	1	0	0	g31925	probable acyl-CoA dehydrogenase 6
clu_12148_NA	scaffold36765:388298-400753	0.889862	3.09e-05	0.889862	5.83e-24	3.7e-27	0	0	g31925	probable acyl-CoA dehydrogenase 6
clu_7292_NA	scaffold937-1:1719556-1754280	0.304077	3.11e-05	0.335635	0.0540427	0.0521439	0.0138089	0.0216925
clu_3325_NA	scaffold565-4:2473836-2478747	0.43013	3.14e-05	0	0.852424	0.920472	0.664924	0.489995	g45025
clu_3325_NA	scaffold565-4:2473836-2478799	0.43013	3.14e-05	0	0.147751	0.0798743	0.335496	0.510435	g45025
clu_2827_NA	scaffold6476:1335697-1338150	0.220587	3.17e-05	0.26098	0.0568906	0.0406341	0.1827	0	g37351
clu_2827_NA	scaffold6476:1335739-1338150	0.220587	3.17e-05	0.739225	0.944258	0.959607	0.818008	0	g37351
clu_350_NA	scaffold2266-1:8170974-8187517	0.665953	3.18e-05	0.792597	0	0	0.126644	0	g8804	pleckstrin homology-like domain family B member 1 isoform X3
clu_350_NA	scaffold2266-1:8170974-8195846	0.665953	3.18e-05	0.207403	0	0	0.873356	0	g8804	pleckstrin homology-like domain family B member 1 isoform X3
clu_7125_NA	scaffold78-1452:871499-878081	0.494134	3.34e-05	0.759543	0.227522	0.295435	0	0	g27693	Transposon Ty3-I Gag-Pol polyprotein-like Protein
clu_7125_NA	scaffold78-1452:840347-878081	0.46542	3.34e-05	0.240457	0.666535	0.705877	0	0	g27693	Transposon Ty3-I Gag-Pol polyprotein-like Protein
clu_7113_NA	scaffold26890:566948-576118	0.394533	3.36e-05	0.660957	0.605137	0.441455	0.267015	0.364154	g34305
clu_7113_NA	scaffold26890:566948-574837	0.206689	3.36e-05	0.158636	0.213082	0.257811	0.366938	0.328919	g34305
clu_3163_NA	scaffold3527-1:61073-96199	0.30213	3.36e-05	0.778467	0.784542	0.567284	0.474556	0.482783	g16458
clu_3163_NA	scaffold3527-1:61073-84571	0.253802	3.36e-05	0.221533	0.215999	0.373824	0.39415	0.453077	g16458
clu_2424_NA	scaffold32093-1:13928183-13940441	0.260162	3.41e-05	0.15493	0.371571	0.162755	0.103885	0	g31164
clu_2424_NA	scaffold32093-1:13928183-13937244	0.207344	3.41e-05	0.436349	0.229005	0.305092	0.426319	0	g31164
clu_9014_NA	scaffold985337:31888-37886	0.224815	3.48e-05	0	0.929116	0.978066	0.748723	0.935873
clu_9014_NA	scaffold985337:36789-37886	0.203923	3.48e-05	0	0.0722665	0.022205	0.227351	0.0643286
clu_5716_NA	scaffold557-7:15683071-15694113	0.311256	3.54e-05	0.311256	1.21e-18	6.02e-18	4.01e-10	0	g29482
clu_5716_NA	scaffold557-7:15687245-15694113	0.311256	3.54e-05	0.688794	1	1	1	0	g29482
clu_6174_NA	scaffold1195-2:792559-795218	0.281797	3.72e-05	0.988861	0.711155	0.792927	0.733787	0	g42189
clu_6174_NA	scaffold1195-2:795337-841196	0.255014	3.72e-05	0.013881	0.241508	0.207073	0.266213	0	g42189
clu_11370_NA	scaffold4633-1:1893743-1895405	0.385889	3.75e-05	0.359994	0.703749	0.709415	0.591701	0.583137	g22022
clu_11370_NA	scaffold4633-1:1893743-1895693	0.385889	3.75e-05	0.713363	0.299658	0.295279	0.408577	0.435893	g22022
clu_7984_NA	scaffold6469-3:33783-37814	0.539683	3.8e-05	0	0.630987	0.636005	0.129386	0.101071	g38468,g38467	40S ribosomal protein S3, 60S ribosomal protein L29-like
clu_7984_NA	scaffold6469-3:33783-37978	0.539683	3.8e-05	0	0.421454	0.421453	0.874694	0.904252	g38468,g38467	40S ribosomal protein S3, 60S ribosomal protein L29-like
clu_11215_NA	scaffold6858:59169-69290	0.354728	3.83e-05	0	0.865072	0.836568	0.490443	0.624403	g36907
clu_11215_NA	scaffold6858:59217-69290	0.220684	3.83e-05	0	0.0992578	0.133727	0.321112	0.184467	g36907
clu_5449_NA	scaffold50-4:689623-747029	0.29231	3.85e-05	0.991633	0.702315	0.825051	0.980785	0.994651	g27272	myosin VA (heavy polypeptide 12, myoxin), isoform CRA_b
clu_5449_NA	scaffold50-4:746215-747029	0.29231	3.85e-05	0.00851347	0.301221	0.179221	0.0192366	0.00543725	g27272	myosin VA (heavy polypeptide 12, myoxin), isoform CRA_b
clu_3064_NA	scaffold8749:1469730-1471689	0.533389	3.85e-05	0.00987535	0.543264	0	0	0
clu_3064_NA	scaffold8749:1471286-1471689	0.297098	3.85e-05	0.551501	0.254403	0	0	0
clu_10818_NA	scaffold7522-1:219662-226217	0.273888	3.92e-05	0	1	0	0.726112	0	g39100
clu_10818_NA	scaffold7522-1:219662-226271	0.273888	3.92e-05	0	1.22e-09	0	0.273888	0	g39100
clu_4728_NA	scaffold11346:856797-865196	0.354159	3.93e-05	0.630562	0.904382	0.945654	0.97204	0.985959	g11340
clu_4728_NA	scaffold11346:859050-865196	0.354159	3.93e-05	0.371891	0.0773783	0.0567777	0.0290754	0.0153554	g11340
clu_5588_NA	scaffold1150-1:10789314-10849078	1	3.99e-05	1.3e-09	0.995275	1	0.997371	1	g42878,g42875	arginine kinase 2
clu_5588_NA	scaffold1150-1:10845723-10849078	1	3.99e-05	1	0.00472549	2.09e-12	0.00262865	9.48e-10	g42878,g42875	arginine kinase 2
clu_11971_NA	scaffold5018:398750-452998	0.266334	4.02e-05	0	0.290746	0.0886573	0	0.0254597	g22623
clu_11971_NA	scaffold5018:398750-401596	0.26561	4.02e-05	0	0.58235	0.84796	0	0.843908	g22623
clu_12002_NA	scaffold1225:141536-144001	0.564476	4.02e-05	0	0	0.471338	0.922989	0.878538	g42554	sepiapterin reductase-like
clu_12002_NA	scaffold1225:135487-144001	0.556774	4.02e-05	0	0	0.622248	0.0654739	0.146845	g42554	sepiapterin reductase-like
clu_7045_NA	scaffold50865-1:5410498-5414169	0.321816	4.29e-05	0	0.512395	0.715045	0.802124	0.827979	g30295
clu_7045_NA	scaffold50865-1:5410676-5414169	0.236515	4.29e-05	0	0.37099	0.210267	0.169276	0.127694	g30295
clu_5014_NA	scaffold6377-1:2985716-2986845	0.668059	4.32e-05	0	0	0.182128	0.47705	0.849142	g38195	tropomyosin 1, isoform E
clu_5014_NA	scaffold6377-1:2985716-2987767	0.449759	4.32e-05	0	0	0.55131	0.403096	0.112031	g38195	tropomyosin 1, isoform E
clu_5014_NA	scaffold6377-1:2982801-2987767	0.218301	4.32e-05	0	0	0.301262	0.119965	0.0493063	g38195	tropomyosin 1, isoform E
clu_7016_NA	scaffold140036:10536-24770	0.27924	4.39e-05	0.688916	0.811172	0.872187	0.885247	0.947367	g48763
clu_7016_NA	scaffold140036:10536-15012	0.27924	4.39e-05	0.340552	0.198421	0.137104	0.124575	0.0536026	g48763
clu_5703_NA	scaffold557-7:13912776-13921342	0.236554	4.4e-05	0.960487	0.82815	0.856816	0.730071	0	g29459
clu_79_NA	scaffold6837:1812486-1814360	0.220822	4.58e-05	0.999999	0	0	0.839317	0.779176	g37685	spire, isoform E
clu_8990_NA	scaffold4164-1:1120694-1122356	0.25587	4.63e-05	0.698626	0.907044	0.953909	0.92401	0	g13448
clu_8990_NA	scaffold4164-1:1120694-1128787	0.227127	4.63e-05	0.227127	6.23e-16	9.62e-13	2.36e-17	0	g13448
clu_2162_NA	scaffold11642-3:15828-20015	0.218647	4.69e-05	0	0.0434952	0.00785467	0.164136	0.226965
clu_10323_NA	scaffold3305-2:8208332-8224380	0.213746	5.03e-05	0.593583	0.383094	0.567844	0	0
clu_948_NA	scaffold6239-16:13148046-13192740	0.616225	5.09e-05	0	0	0.985109	0.381693	0.575189	g38978	LOW QUALITY PROTEIN: high affinity copper uptake protein 1-like
clu_948_NA	scaffold6239-16:13161766-13192740	0.616225	5.09e-05	0	0	0.0162795	0.631115	0.462839	g38978	LOW QUALITY PROTEIN: high affinity copper uptake protein 1-like
clu_4997_NA	scaffold11021-4:179253-183512	0.476933	5.12e-05	0.703394	0	0	0.226461	0	g11804	sprint, isoform O
clu_4997_NA	scaffold11021-4:179768-183512	0.476933	5.12e-05	0.296606	0	0	0.773539	0	g11804	sprint, isoform O
clu_8093_NA	scaffold40064-5:310026-329109	0.391214	5.39e-05	0.256799	0.457194	0.380105	0	0.0661845	g32082
clu_8093_NA	scaffold40064-5:310026-343631	0.391214	5.39e-05	0.748586	0.544446	0.6312	0	0.93566	g32082
clu_5897_NA	scaffold9175:4651939-4661066	0.55617	5.41e-05	0.677008	0	0.120838	0	0	g3073	tumor susceptibility gene 101 protein-like isoform X5
clu_5897_NA	scaffold9175:4651939-4661786	0.55617	5.41e-05	0.322992	0	0.879162	0	0	g3073	tumor susceptibility gene 101 protein-like isoform X5
clu_4355_NA	scaffold4621-3:9541-10546	0.361424	5.46e-05	0.890911	0.638158	0.675654	0.573033	0.529205	g21885
clu_4355_NA	scaffold4621-3:9541-11031	0.361424	5.46e-05	0.109371	0.364204	0.324454	0.427703	0.472715	g21885
clu_8623_NA	scaffold13236-4:3587552-3595719	0.633064	5.6e-05	0.633064	7.6e-38	5.01e-33	1.77e-32	8.68e-28	g15033	M-phase inducer phosphatase-like isoform X2
clu_8623_NA	scaffold13236-4:3594025-3595719	0.633064	5.6e-05	0.367012	1	1	1	1	g15033	M-phase inducer phosphatase-like isoform X2
clu_186_NA	scaffold499634:3604-5033	0.245119	5.67e-05	0	0	0.316724	0.562082	0.469342
clu_3615_NA	scaffold5390:2440976-2441311	0.222935	5.86e-05	0.413001	0.629531	0.601825	0.63594	0.546121	g23847
clu_3615_NA	scaffold5390:2440976-2441317	0.222935	5.86e-05	0.589336	0.373373	0.400015	0.364068	0.455009	g23847
clu_4143_NA	scaffold13594-3:1018492-1021488	0.310589	6.12e-05	0	0	0	0.426604	0.116015	g14435
clu_4143_NA	scaffold13594-3:1020498-1021488	0.310589	6.12e-05	0	0	0	0.573396	0.883985	g14435
clu_11235_NA	scaffold46-1:124015-127769	0.34377	6.12e-05	0	0	0	0.607249	0.951019	g27077
clu_6047_NA	scaffold25573:551393-580532	0.376156	6.23e-05	0.478097	0	0	0	0.854253	g34117	phosphorylase kinase gamma
clu_9702_NA	scaffold78-1426:8405849-8415774	0.284426	6.37e-05	0.0454605	0.218341	0.333972	0.260865	0	g27656
clu_330_NA	scaffold2266-1:2071311-2071668	0.436429	6.53e-05	0.563596	1	1	1	0.999997	g8745
clu_330_NA	scaffold2266-1:2071311-2085932	0.436429	6.53e-05	0.436429	4.25e-18	2.55e-21	1.07e-30	2.82e-06	g8745
clu_10054_NA	scaffold8514-6:406756-420954	0.266616	6.64e-05	0	1.08e-07	0	0.266616	0	g4153
clu_10054_NA	scaffold8514-6:406773-420954	0.266616	6.64e-05	0	1	0	0.733384	0	g4153
clu_3642_NA	scaffold4915:4090196-4104676	0.236453	7.33e-05	0	0.999993	0.999995	0.763562	0	g22339
clu_11787_NA	scaffold165732:6164-7499	0.211289	7.65e-05	0.00729217	0.113885	0.107209	0.237771	0.216034
clu_11787_NA	scaffold165732:6164-8564	0.211289	7.65e-05	0.995864	0.899689	0.896021	0.785203	0.820505
clu_5556_NA	scaffold7601-1:1611856-1619242	0.344561	7.91e-05	0	0	0	0.882227	0.537666	g39331	megakaryocyte stimulating factor
clu_5556_NA	scaffold7601-1:1614607-1619242	0.344561	7.91e-05	0	0	0	0.117773	0.462334	g39331	megakaryocyte stimulating factor
clu_11428_NA	scaffold1629:9907-14026	0.299072	8.32e-05	0.388628	0.587725	0.687633	0.524184	0.420879	g41557
clu_9809_NA	scaffold756-9:2015692-2020904	0.206085	8.64e-05	0	1	0.994474	0.793915	0	g44510
clu_619_NA	scaffold5378:872876-875843	0.326074	8.7e-05	0	0.999997	0	0.673923	0.776502	g23676	Na+/K+ ATPase alpha subunit
clu_9278_NA	scaffold2488-20:5330032-5343574	0.232455	8.75e-05	0.0377551	0.161892	0.270731	0	0	g10029
clu_9278_NA	scaffold2488-20:5330032-5343903	0.232455	8.75e-05	0.963023	0.84024	0.730568	0	0	g10029
clu_7753_NA	scaffold3658:138919-139685	0.200356	8.94e-05	0.271999	0.32711	0.29854	0.216579	0.125158	g13705
clu_11826_NA	scaffold12193:179690-179877	0.990069	9.04e-05	0.990069	0	0	7.99e-15	7.81e-25	g29970	phosphatidylinositol 3-kinase regulatory subunit alpha-like isoform X1
clu_11826_NA	scaffold12193:179690-181698	0.990069	9.04e-05	0.00993207	0	0	1	1	g29970	phosphatidylinositol 3-kinase regulatory subunit alpha-like isoform X1
clu_2538_NA	scaffold8366-1:958145-959091	0.30871	9.05e-05	0.600331	0.290139	0.310363	0.362914	0.411868	g3834
clu_2538_NA	scaffold8366-1:958148-959091	0.30871	9.05e-05	0.401944	0.716407	0.692926	0.640489	0.590827	g3834
clu_7367_NA	scaffold220-3:274531-275372	0.218585	9.22e-05	0	0	0	0.327445	0.10886	g24921
clu_2194_NA	scaffold3304-1:1123057-1173024	0.384053	9.23e-05	0	0	0	0.978409	0.594356	g15952
clu_2194_NA	scaffold3304-1:1143285-1173024	0.384053	9.23e-05	0	0	0	0.021591	0.405644	g15952
clu_7553_NA	scaffold8364:747858-758097	0.414353	9.47e-05	0	0.955619	0.925012	0.529754	0	g3775
clu_7553_NA	scaffold8364:747858-753345	0.209293	9.47e-05	0	0.0460099	0.0749877	0.255308	0	g3775
clu_7553_NA	scaffold8364:753360-758097	0.20506	9.47e-05	0	0.00988669	0.0186763	0.214947	0	g3775
clu_649_NA	scaffold8579:140704-173027	0.350951	9.49e-05	0	0.0127439	0.0733966	0.208739	0.363695	g4341,g4340
clu_649_NA	scaffold8579:93965-173027	0.350951	9.49e-05	0	0.988022	0.933335	0.793801	0.640796	g4341,g4340
clu_7910_NA	scaffold228-1:373628-380920	0.383999	9.55e-05	0.214887	0.505175	0.595552	0.584101	0	g25055,g25056	zinc finger C2HC domain-containing protein 1A-like isoform X1
clu_7910_NA	scaffold228-1:373628-377395	0.289105	9.55e-05	0.514052	0.328825	0.258125	0.221884	0	g25055,g25056	zinc finger C2HC domain-containing protein 1A-like isoform X1
clu_1467_NA	scaffold3435-7:2186230-2189885	0.208567	9.69e-05	0.77399	0.95991	0.965249	0.942831	0.982202
clu_1467_NA	scaffold3435-7:2186230-2196147	0.208567	9.69e-05	0.233374	0.0401707	0.0353697	0.0611458	0.0180084
clu_5203_NA	scaffold71461:2841954-2844652	0.533855	9.84e-05	0.115941	0.393857	0.352918	0.654649	0.2649	g50135	secretory 23, isoform G
clu_5203_NA	scaffold71461:2841954-2843040	0.288742	9.84e-05	0.486345	0.317272	0.351716	0.189421	0.372971	g50135	secretory 23, isoform G
clu_5203_NA	scaffold71461:2843066-2844652	0.245113	9.84e-05	0.426068	0.300246	0.30089	0.160985	0.377374	g50135	secretory 23, isoform G
clu_6961_NA	scaffold3480:2867494-2869398	0.9847	9.94e-05	0.0153025	0	0	1	1	g17248	phosphatidylinositol 3-kinase regulatory subunit alpha-like isoform X2
clu_6961_NA	scaffold3480:2869214-2869398	0.9847	9.94e-05	0.9847	0	0	2.4e-23	6.97e-28	g17248	phosphatidylinositol 3-kinase regulatory subunit alpha-like isoform X2
clu_3280_NA	scaffold4429:210036-218294	0.232294	0.000101075	0	0	0	0.0263748	0.258669	g21087
clu_7971_NA	scaffold5901-1:3311101-3315912	0.368723	0.000102743	0	0.661502	0.572404	0.938648	0	g20010
clu_1942_NA	scaffold6338-5:246375-252308	0.292903	0.000103626	0.818322	0.934518	0.87406	0.64141	0	g37951
clu_1942_NA	scaffold6338-5:246375-249413	0.210305	0.000103626	0.109409	0.0418172	0.0952051	0.251829	0	g37951
clu_187_NA	scaffold150408:1189-13411	0.215489	0.000105156	0	0.288462	0.152622	0.366783	0.305973
clu_187_NA	scaffold150408:1204-13411	0.213464	0.000105156	0	0.674741	0.847378	0.633217	0.694073
clu_10488_NA	scaffold3507-2:1095988-1143487	0.556943	0.000111956	0	0.195709	0.174695	0	0.658071	g16371	Retrovirus-related Pol polyprotein from transposon opus
clu_10488_NA	scaffold3507-2:1123315-1143487	0.556943	0.000111956	0	0.902501	0.463915	0	0.345557	g16371	Retrovirus-related Pol polyprotein from transposon opus
clu_10488_NA	scaffold3507-2:1095988-1099310	0.425264	0.000111956	0	7.58e-05	0.425264	0	3.52e-11	g16371	Retrovirus-related Pol polyprotein from transposon opus
clu_8182_NA	scaffold152249:3270-10077	0.227243	0.000112671	0.491843	0.326139	0.387875	0.267977	0
clu_3276_NA	scaffold4429:21861-26326	0.269856	0.000112847	0	0.517813	0.247957	0	0	g21086
clu_7414_NA	scaffold2064:10171823-10174625	0.200316	0.000114215	0.532367	0.699759	0.61387	0.49606	0.619904	g7576
clu_7414_NA	scaffold2064:10171823-10174631	0.200316	0.000114215	0.471286	0.303676	0.387561	0.504004	0.384723	g7576
clu_2119_NA	scaffold7964-1:1355000-1380302	0.269593	0.000115653	0	0	0.987164	0.71755	0.813203
clu_2119_NA	scaffold7964-1:1355000-1380503	0.269593	0.000115653	0	0	0.0128577	0.28505	0.191124
clu_3936_NA	scaffold4621-21:4397266-4462026	0.414721	0.000117166	0	0	0	0.252502	0.667222
clu_3936_NA	scaffold4621-21:4397266-4472265	0.414721	0.000117166	0	0	0	0.747498	0.332778
clu_7039_NA	scaffold50865-1:5212418-5215310	0.666008	0.000117772	0	1.15e-10	0	0.666008	0	g30288	Cadherin-N, isoform D
clu_7039_NA	scaffold50865-1:5213204-5215310	0.666008	0.000117772	0	1	0	0.333992	0	g30288	Cadherin-N, isoform D
clu_5012_NA	scaffold6377-1:2967626-2977345	0.413674	0.000125274	0	0	0.422024	0.610823	0.83582	g38195	tropomyosin 1, isoform E
clu_5012_NA	scaffold6377-1:2967626-2970985	0.278285	0.000125274	0	0	0.314788	0.117044	0.0328721	g38195	tropomyosin 1, isoform E
clu_11591_NA	scaffold9864:5385-38748	0.353956	0.000125344	0	0	0.466909	0.112953	0	g2169
clu_11591_NA	scaffold9864:34288-38748	0.217483	0.000125344	0	0	0.351275	0.568758	0	g2169
clu_1710_NA	scaffold1502:3341236-3409600	0.508819	0.00012589	0	0.389433	0.51718	0.898252	0	g41370	ras-related protein Rap-2c-like
clu_1710_NA	scaffold1502:3378450-3409600	0.508819	0.00012589	0	0.613762	0.487337	0.102288	0	g41370	ras-related protein Rap-2c-like
clu_5049_NA	scaffold753:828270-833946	0.22881	0.000131165	0.719957	0.721225	0.848948	0.939356	0	g44429
clu_1501_NA	scaffold3435-7:2860421-2877077	0.274431	0.00013129	0	0.657037	0.778174	0.864056	0.931468	g15573	aminolevulinate synthase
clu_1501_NA	scaffold3435-7:2860421-2877971	0.274431	0.00013129	0	0.350585	0.229544	0.138419	0.0699545	g15573	aminolevulinate synthase
clu_823_NA	scaffold2985-1:984657-1002423	0.432972	0.000131979	0	0	0	0.390425	0.823397	g18927
clu_823_NA	scaffold2985-1:984657-985383	0.217246	0.000131979	0	0	0	0.305858	0.088612	g18927
clu_823_NA	scaffold2985-1:993263-1002423	0.215726	0.000131979	0	0	0	0.303717	0.0879913	g18927
clu_7520_NA	scaffold5883-1:1044599-1122347	0.443562	0.000140196	0	0.0567644	0	0.500327	0.199035	g19842,g19844
clu_7520_NA	scaffold5883-1:1044599-1078238	0.363909	0.000140196	0	0.37586	0	0.120076	0.0119516	g19842,g19844
clu_7520_NA	scaffold5883-1:1044599-1135138	0.313236	0.000140196	0	0.569082	0	0.469278	0.729264	g19842,g19844
clu_8899_NA	scaffold1116-2:421777-449988	0.294663	0.000145284	0	0.0321878	0.070142	0.136506	0.333703	g43775
clu_8899_NA	scaffold1116-2:445403-449988	0.294663	0.000145284	0	0.975981	0.958049	0.890385	0.681318	g43775
clu_658_NA	scaffold676:1018698-1021423	0.47324	0.000160316	0.479728	0.0694289	0.0545087	0.0058726	0.010874	g45234	NADH-ubiquinone oxidoreductase 75 kDa subunit, mitochondrial-like
clu_658_NA	scaffold676:1018698-1021575	0.47324	0.000160316	0.525619	0.931171	0.946133	0.994159	0.989141	g45234	NADH-ubiquinone oxidoreductase 75 kDa subunit, mitochondrial-like
clu_7033_NA	scaffold50865-1:4506854-4523065	0.2786	0.000168775	0.41816	0.264338	0.137019	0.23406	0
clu_5786_NA	scaffold302:174792-176127	0.363181	0.000171693	0	0.752874	0.519678	0.884323	0.7828	g25935	beta-glucuronidase-like isoform X2
clu_5786_NA	scaffold302:174792-176367	0.308962	0.000171693	0	0.222863	0.427723	0.0996513	0.196751	g25935	beta-glucuronidase-like isoform X2
clu_7612_NA	scaffold8633-6:1038239-1038818	0.202219	0.000174442	0	0	6.58e-09	0.202219	0	g4462	calpain-B-like, partial
clu_7612_NA	scaffold8633-6:1038239-1039884	0.202219	0.000174442	0	0	1	0.797781	0	g4462	calpain-B-like, partial
clu_2757_NA	scaffold1739:5331688-5352151	0.313167	0.000184696	0.404567	0.160221	0.0552992	0.137828	0.0629614	g46043
clu_2757_NA	scaffold1739:5343901-5352151	0.204388	0.000184696	0.079314	0.236423	0.279349	0.237896	0.27215	g46043
clu_5539_NA	scaffold21080:3975195-3981857	0.331786	0.000190486	0	0.287726	0.508364	0.347998	0.195593	g33641
clu_976_NA	scaffold898-1:50413-55689	0.498171	0.000190865	0.571536	0.0671831	0.0949378	0.129632	0.101252	g44379	6-phosphofructo-2-kinase/fructose-2,6-bisphosphatase isoform X8
clu_976_NA	scaffold898-1:50413-56399	0.498171	0.000190865	0.456307	0.934668	0.91088	0.877808	0.905183	g44379	6-phosphofructo-2-kinase/fructose-2,6-bisphosphatase isoform X8
clu_5769_NA	scaffold5205:139634-174927	0.203717	0.000190948	0.833797	0.994907	0.985663	0.98468	0.99225	g23126
clu_7651_NA	scaffold7912-1:360899-366213	0.364408	0.000192308	0.200036	0.383644	0.564444	0	0	g36602,g36603
clu_9125_NA	scaffold867:3134980-3138406	0.43213	0.000199422	0	0	0	0.460605	0.0284749	g44161	intracellular protein transport protein USO1-like isoform X2
clu_9125_NA	scaffold867:3134980-3135748	0.242641	0.000199422	0	0	0	0.273124	0.515765	g44161	intracellular protein transport protein USO1-like isoform X2
clu_9888_NA	scaffold6842:67634-68158	0.543406	0.00019957	0.119834	0.497959	0.566379	0.651496	0.587506	g37762	poly(A) polymerase gamma
clu_8782_NA	scaffold5764-3:1033495-1098033	0.319995	0.00020258	0	0	0	0.0617596	0.381755
clu_8782_NA	scaffold5764-3:1065727-1098033	0.319995	0.00020258	0	0	0	0.93824	0.618245
clu_11834_NA	scaffold5689-20:12284-14755	0.34642	0.000212076	0.639649	0.940488	0.972074	0.963569	0.961701	g19303
clu_11834_NA	scaffold5689-20:12900-14755	0.24533	0.000212076	0.274416	0.0526521	0.0324113	0.0380212	0.0388126	g19303
clu_7371_NA	scaffold1013274:4254-4417	0.408665	0.000212127	0.408665	9.35e-38	1.11e-26	2.72e-37	1.52e-20	g46659
clu_7371_NA	scaffold1013274:4254-6818	0.408665	0.000212127	0.591373	1	1	1	1	g46659
clu_7616_NA	scaffold8633-6:1098141-1103421	0.297372	0.00021439	0.999994	0	0.999994	0.702639	0	g4462	calpain-B-like, partial
clu_6380_NA	scaffold891-1:34479-37726	0.289285	0.000221902	0.262273	0.339883	0.519627	0.228624	0.250298	g44332
clu_6380_NA	scaffold891-1:34479-37798	0.289285	0.000221902	0.743813	0.660117	0.482091	0.774589	0.760797	g44332
clu_7885_NA	scaffold33094:103983-117330	0.213678	0.00022446	0.707597	0.83191	0.907872	0.917455	0.920082	g31315
clu_7885_NA	scaffold33094:103983-122152	0.213678	0.00022446	0.296939	0.174093	0.096938	0.0846708	0.0826901	g31315
clu_9168_NA	scaffold2109:2048597-2069970	0.312804	0.000225968	0.587307	0.322781	0.304685	0.313504	0.624	g5769
clu_9168_NA	scaffold2109:2046736-2048433	0.281498	0.000225968	0.269765	0.493465	0.522739	0.538437	0.30596	g5769
clu_3448_NA	scaffold5068-1:8240660-8247165	0.266381	0.000227077	0.733683	1	1	1	0.99808	g22906
clu_3448_NA	scaffold5068-1:8240660-8258678	0.266381	0.000227077	0.267978	1.66e-66	5.06e-67	4.77e-36	0.00191978	g22906
clu_3909_NA	scaffold5386:6127174-6134093	0.215493	0.000229726	0.224922	0.2963	0.27561	0.252777	0.43778	g23742
clu_3909_NA	scaffold5386:6127174-6134282	0.215493	0.000229726	0.782627	0.705933	0.725355	0.748922	0.562625	g23742
clu_11474_NA	scaffold2488-1:9697014-9698700	0.297317	0.000231361	0	0.5601	0.557799	0.730516	0.4332	g9932
clu_11474_NA	scaffold2488-1:9656389-9698700	0.293533	0.000231361	0	0.430443	0.434343	0.264319	0.561844	g9932
clu_10497_NA	scaffold11746:5242-44941	0.292682	0.00023685	0	0.967161	0	0.674479	0
clu_10497_NA	scaffold11746:5242-99559	0.292682	0.00023685	0	0.0328391	0	0.325521	0
clu_2234_NA	scaffold11788-1:911848-915400	0.242292	0.000237052	0.418218	0.38632	0.351363	0.383646	0.184512	g12349,g12350
clu_4168_NA	scaffold7168-1:3007331-3015995	0.246056	0.000248603	0.740792	0.982744	0.950317	0.966835	0.987305	g40389
clu_4168_NA	scaffold7168-1:3007331-3017650	0.246056	0.000248603	0.265026	0.0238583	0.0574037	0.0431898	0.0201542	g40389
clu_4455_NA	scaffold10522:632957-683467	0.207015	0.000249994	0.893783	0	0	0.686767	0.738339
clu_4455_NA	scaffold10522:638539-683467	0.207015	0.000249994	0.106587	0	0	0.313259	0.264948
clu_8935_NA	scaffold568241:6516-6921	0.317133	0.000250051	0	0	0	0.499634	0.182501	g47106
clu_8935_NA	scaffold568241:6516-7559	0.317133	0.000250051	0	0	0	0.500366	0.817499	g47106
clu_1823_NA	scaffold10402-4:295173-329598	0.358065	0.000252721	0.241146	0	0	0.599211	0	g5142,g5143
clu_1823_NA	scaffold10402-4:278263-281709	0.276691	0.000252721	0.458991	0	0	0.1823	0	g5142,g5143
clu_4536_NA	scaffold6869:2115164-2116594	0.441297	0.000256956	0	0	0	0.674267	0.23297	g36951,g36952
clu_4536_NA	scaffold6869:2115164-2155111	0.430142	0.000256956	0	0	0	0.295489	0.725631	g36951,g36952
clu_1498_NA	scaffold3435-7:2826753-2828760	0.256532	0.000261785	0.596859	0.742416	0.659329	0.485851	0.612446	g15573	aminolevulinate synthase
clu_1498_NA	scaffold3435-7:2826756-2828760	0.256532	0.000261785	0.403165	0.257697	0.340756	0.514207	0.387627	g15573	aminolevulinate synthase
clu_8970_NA	scaffold328981:3553-24520	0.414112	0.000262516	0	0.713876	0.398226	0.29891	0
clu_8970_NA	scaffold328981:3553-20118	0.254461	0.000262516	0	0.150568	0.278757	0.403017	0
clu_1693_NA	scaffold16:9339572-9340875	0.202514	0.000262687	0	0.64705	0.680609	0.731203	0.528814	g26557
clu_1693_NA	scaffold16:9340401-9340875	0.202514	0.000262687	0	0.356175	0.32014	0.269462	0.471685	g26557
clu_10786_NA	scaffold278-5:1963572-1969429	0.233496	0.000266493	0.377428	0.151744	0.151502	0.18575	0.171141	g25759
clu_10753_NA	scaffold7795:7396475-7400833	0.957585	0.000266903	0.958258	0.566642	0	1.58e-22	4.22e-07	g39581	pituitary homeobox x isoform X3
clu_10753_NA	scaffold7795:7396475-7448814	0.957585	0.000266903	0.0424168	0.433881	0	1	1	g39581	pituitary homeobox x isoform X3
clu_11425_NA	scaffold19244:380049-473912	0.228652	0.000271645	0.919073	0.710142	0.895866	0.942738	0.820347	g33400
clu_182_NA	scaffold37:1129621-1139064	0.206696	0.000274076	0	0.94453	0.924168	0.863778	0.737834	g26958
clu_263_NA	scaffold10202-14:369515-371652	0.205097	0.000279686	0	0	0	0.877814	0.672718	g816
clu_5677_NA	scaffold11417:1151326-1185138	0.268749	0.000281703	0	0.735686	0.586286	0.859186	0
clu_5677_NA	scaffold11417:1185256-1250402	0.24501	0.000281703	0	0.184618	0.377169	0.140811	0
clu_9846_NA	scaffold2062:332552-343325	0.277175	0.000285626	0	0.165183	0.130574	0.411762	0	g7453
clu_4179_NA	scaffold4621-28:1693450-1701274	0.571806	0.000299137	0.298123	0.869929	0	0	0	g21935	thioredoxin domain-containing protein 9-like
clu_4179_NA	scaffold4621-28:1696615-1701274	0.315561	0.000299137	0.387293	0.0717316	0	0	0	g21935	thioredoxin domain-containing protein 9-like
clu_4179_NA	scaffold4621-28:1693450-1696549	0.256245	0.000299137	0.314585	0.0583398	0	0	0	g21935	thioredoxin domain-containing protein 9-like
clu_3105_NA	scaffold55-2:3579962-3594786	0.267139	0.000300327	0	0.648605	0.523592	0.486165	0.378678
clu_3105_NA	scaffold55-2:3593839-3594786	0.253937	0.000300327	0	0.0627979	0.222932	0.262961	0.316735
clu_2723_NA	scaffold14427-2:12409593-12440906	0.336254	0.000306793	0	0.746365	0	0.495747	0.410111	g35541
clu_2723_NA	scaffold14427-2:12408325-12409515	0.20378	0.000306793	0	0.250677	0	0.413156	0.440072	g35541
clu_9987_NA	scaffold7830:3740735-3743436	0.392206	0.000308562	0.0518675	0.309074	0.269162	0.450949	0.255844	g36426
clu_9987_NA	scaffold7830:3740735-3741818	0.226305	0.000308562	0.58088	0.390264	0.420991	0.320447	0.420124	g36426
clu_9114_NA	scaffold867:643926-650336	0.326816	0.000322624	0	0.591009	0.820999	0.653876	0.91816	g44129
clu_4356_NA	scaffold4621-3:10702-11556	0.328284	0.00032486	0.813526	0.631461	0.592899	0.579991	0.489222	g21885
clu_4356_NA	scaffold4621-3:11187-11556	0.328284	0.00032486	0.188547	0.374768	0.415294	0.421094	0.518874	g21885
clu_4577_NA	scaffold11377:510258-516145	0.276321	0.000335299	0	0.43021	0.609962	0.705844	0	g11376
clu_4577_NA	scaffold11377:510318-516145	0.276321	0.000335299	0	0.570477	0.390939	0.295369	0	g11376
clu_6946_NA	scaffold2126:66141-72375	0.228969	0.000348084	0.749127	0.97394	0	0.968284	0	g5904
clu_5393_NA	scaffold8552:2231715-2240468	0.706968	0.000348454	0.293055	0.988314	0.996989	1	1
clu_5393_NA	scaffold8552:2231715-2243540	0.706968	0.000348454	0.717042	0.0116857	0.0030107	4.84e-12	7.12e-11
clu_12021_NA	scaffold12311:186459-188154	0.205893	0.000357768	0	0.148446	0.0949656	0.0274696	0.233423	g30039
clu_12021_NA	scaffold12311:187591-188154	0.205893	0.000357768	0	0.8519	0.905456	0.972738	0.766932	g30039
clu_6257_NA	scaffold2345-2:700358-706130	0.303105	0.00036997	0.488096	0.291574	0.189987	0.266189	0.240171	g9740
clu_6257_NA	scaffold2345-2:700358-705807	0.267321	0.00036997	0.500797	0.670752	0.754402	0.716666	0.741489	g9740
clu_9915_NA	scaffold12718:35380-43763	0.267595	0.000377412	0	0	0	0.799672	0.532077	g28320
clu_10010_NA	scaffold12564-1:5553-11506	0.246233	0.000381227	0	0	0	0.432997	0.186764	g28125,g28123
clu_10010_NA	scaffold12564-1:11149-11506	0.203885	0.000381227	0	0	0	0.146083	0.349968	g28125,g28123
clu_4644_NA	scaffold4341:3052799-3060723	0.504304	0.000391964	0.376425	0.786259	0.881706	0	0	g20664	arf-GAP domain and FG repeat-containing protein 1 isoform X15
clu_5634_NA	scaffold231:3172271-3173439	0.476788	0.000391964	0.877442	0.580009	0.549501	0	0	g25151	methuselah-like 15, isoform C
clu_5634_NA	scaffold231:3174485-3180152	0.302672	0.000391964	0.000240852	0.277272	0.302825	0	0	g25151	methuselah-like 15, isoform C
clu_4644_NA	scaffold4341:3052799-3057854	0.254402	0.000391964	0.372541	0.14052	0.0601679	0	0	g20664	arf-GAP domain and FG repeat-containing protein 1 isoform X15
clu_4644_NA	scaffold4341:3057946-3060723	0.249902	0.000391964	0.309005	0.0879897	0.0674968	0	0	g20664	arf-GAP domain and FG repeat-containing protein 1 isoform X15
clu_11730_NA	scaffold10211:3787-21221	0.221906	0.000395617	0.00488288	0.0668033	0	0	0.246075	g872
clu_9127_NA	scaffold867:3147988-3155621	0.265476	0.00040729	0	0	8.4e-06	1.1e-05	0.265484
clu_9127_NA	scaffold867:3147988-3157219	0.221982	0.00040729	0	0	0.83007	0.977346	0.630206
clu_9665_NA	scaffold78-1426:937625-945434	0.802397	0.000408305	0.0325995	0.834996	0	0	0	g27596	tuberin-like
clu_9665_NA	scaffold78-1426:943176-945434	0.41185	0.000408305	0.411865	1.5e-05	0	0	0	g27596	tuberin-like
clu_9665_NA	scaffold78-1426:937625-943108	0.390547	0.000408305	0.555536	0.164989	0	0	0	g27596	tuberin-like
clu_6999_NA	scaffold2463:2373328-2373704	0.289145	0.000410537	0	0.656481	0.87445	0.945898	0	g8628
clu_6999_NA	scaffold2463:2373343-2373704	0.289145	0.000410537	0	0.34378	0.125629	0.0543734	0	g8628
clu_734_NA	scaffold4492-20:3586926-3595167	0.900608	0.000413461	0.905725	0	3.98e-07	0.00511775	3.52e-07	g21555	Protein Star
clu_734_NA	scaffold4492-20:3586926-3595250	0.900608	0.000413461	0.10064	0	1	0.994882	1	g21555	Protein Star
clu_10554_NA	scaffold252685:1469-5150	0.214	0.00041549	0.956379	0.745563	0.862147	0.815328	0
clu_5624_NA	scaffold231:1936435-1941796	0.220757	0.000417036	0	0	0	0.0673141	0.288071	g25140
clu_5624_NA	scaffold231:1936435-1937873	0.208808	0.000417036	0	0	0	0.523554	0.314746	g25140
clu_743_NA	scaffold4492-20:5113489-5117856	0.319131	0.000441335	0	0.999986	0.986447	0.680923	0	g21571
clu_865_NA	scaffold6239-16:2248393-2259545	0.39971	0.000442911	0	0.579349	0.676546	0.643134	0.244445	g38815
clu_865_NA	scaffold6239-16:2255492-2256247	0.314891	0.000442911	0	0.244619	0.190577	0.128775	0.454915	g38815
clu_1794_NA	scaffold78-1380:428006-495965	0.26349	0.000443682	0	0.127181	0.0433411	0.313984	0	g27550
clu_1669_NA	scaffold16:5107986-5205400	0.507021	0.000444449	0	0.607478	0.63802	0.135266	0.168264
clu_1669_NA	scaffold16:5183244-5205400	0.310596	0.000444449	0	0.305942	0.149849	0.462283	0.428186
clu_1669_NA	scaffold16:5107986-5183218	0.263434	0.000444449	0	0.168333	0.236101	0.41491	0.418855
clu_6202_NA	scaffold2217:4899331-4923439	0.327439	0.000446328	0.331221	0.234966	0.236618	0.55755	0	g6460
clu_9700_NA	scaffold78-1426:8299716-8307461	0.337986	0.00044807	0.834795	0.49778	0.53217	0.568604	0.527153
clu_9700_NA	scaffold78-1426:8286353-8299480	0.313111	0.00044807	0.156423	0.469534	0.460225	0.424991	0.404263
clu_6211_NA	scaffold375138:5790-27056	0.21297	0.000454018	0.69072	0.798606	0.705818	0.585365	0.603782
clu_6211_NA	scaffold375138:5790-34199	0.21297	0.000454018	0.309813	0.202125	0.282461	0.414974	0.396312
clu_8440_NA	scaffold56641:179277-215418	0.254136	0.000458575	0	0.912978	0.825646	0.6591	0.909937
clu_8440_NA	scaffold56641:213288-215418	0.254136	0.000458575	0	0.0891417	0.18851	0.341158	0.094074
clu_728_NA	scaffold4492-20:295075-301764	0.265279	0.000480099	0	0.696682	0.954845	0.857905	0.805331	g21532
clu_728_NA	scaffold4492-20:295075-301770	0.265279	0.000480099	0	0.315399	0.0466648	0.153348	0.214818	g21532
clu_12115_NA	scaffold3443:442263-445338	0.320589	0.000492615	0	0	0.955064	0.634887	0.898802	g15602
clu_12115_NA	scaffold3443:442263-445592	0.320589	0.000492615	0	0	0.0467219	0.365525	0.10657	g15602
clu_7165_NA	scaffold2431:42521-47563	0.233803	0.000494387	0.0305398	0.261827	0.192481	0.0690938	0.132743	g8558
clu_7165_NA	scaffold2431:42521-47639	0.233803	0.000494387	0.972157	0.743218	0.809782	0.936794	0.86851	g8558
clu_3039_NA	scaffold53060:16361336-16365105	0.330022	0.000496736	0	0	0	0.233031	0.563053	g30644	sarcoplasmic calcium-binding proteins II, V, VI, and VII isoform X2
clu_3039_NA	scaffold53060:16361336-16365534	0.304051	0.000496736	0	0	0	0.653996	0.349945	g30644	sarcoplasmic calcium-binding proteins II, V, VI, and VII isoform X2
clu_2546_NA	scaffold4324:1631849-1654912	0.282446	0.000506563	0.374049	0.514853	0	0.436961	0.164349
clu_2546_NA	scaffold4324:1628965-1631729	0.220153	0.000506563	0.410748	0.256221	0	0.196888	0.222561
clu_7617_NA	scaffold8633-6:1107207-1111069	0.312372	0.000514728	0.66275	0.678448	0.780782	0.702492	0.476268	g4462	calpain-B-like, partial
clu_8346_NA	scaffold14427-1:3918028-3964500	0.237715	0.000516198	9.45e-07	0.0574844	0	0.237716	0	g35381
clu_11355_NA	scaffold12563:48748-48880	0.245814	0.000520924	0	0	0	0.124854	0.370669	g28119,g28121
clu_11355_NA	scaffold12563:56153-56285	0.207139	0.000520924	0	0	0	0.737455	0.530316	g28119,g28121
clu_2701_NA	scaffold14427-2:7060130-7064618	0.314366	0.000528929	0.317351	0.0362404	4.41e-24	1.04e-43	1.11e-17
clu_2701_NA	scaffold14427-2:7063506-7064618	0.314366	0.000528929	0.685654	0.96376	1	1	1
clu_10544_NA	scaffold758-1:525662-547760	0.494143	0.00053442	0	0.182865	0.677008	0.262601	0	g44615
clu_10544_NA	scaffold758-1:523009-547760	0.318307	0.00053442	0	0.568033	0.270241	0.588548	0	g44615
clu_5019_NA	scaffold6377-1:2992262-3022168	0.551153	0.000549162	0	0	0	0.182635	0.733788	g38195	tropomyosin 1, isoform E
clu_5019_NA	scaffold6377-1:2992262-3011814	0.210765	0.000549162	0	0	0	0.312561	0.101796	g38195	tropomyosin 1, isoform E
clu_10926_NA	scaffold9636-1:143758-144845	0.207781	0.000560943	0.805645	1	1	0.98949	1	g1376
clu_7625_NA	scaffold2433:1073652-1094486	0.205714	0.00056649	0.895615	0.722111	0.930836	0.840433	0.7739
clu_8514_NA	scaffold2392:769816-780271	0.268765	0.000571491	0	0.610594	0.890699	0.769685	0.74242	g8005
clu_6290_NA	scaffold507:4967417-4973949	0.282911	0.000585706	0.451868	0.352147	0.242152	0.524691	0	g28950
clu_4608_NA	scaffold33354-10:470741-487516	0.795434	0.000586355	0.0950222	0	0.890456	0	0
clu_4608_NA	scaffold33354-10:470741-504628	0.536846	0.000586355	0.610778	0	0.0739323	0	0
clu_2275_NA	scaffold8574-3:234057-238456	0.564387	0.000598568	0	0	0	0.759663	0.195276	g4325	chitinase 8
clu_2275_NA	scaffold8574-3:235959-238456	0.428786	0.000598568	0	0	0	0.175623	0.60441	g4325	chitinase 8
clu_10101_NA	scaffold3451-3:69005-73943	0.235587	0.000601961	0	0.329926	0.279595	0.354984	0.515285	g15722
clu_10101_NA	scaffold3451-3:69059-73943	0.235587	0.000601961	0	0.670106	0.720438	0.645069	0.484818	g15722
clu_4392_NA	scaffold6331-2:1878289-1889449	0.344272	0.000609503	0.0141879	0.173207	0.358067	0	0	g37878
clu_1059_NA	scaffold1963:14174146-14198761	0.271398	0.00060996	0	0.391931	0.236443	0.121059	0
clu_1059_NA	scaffold1963:14174146-14199038	0.271398	0.00060996	0	0.608167	0.772197	0.879467	0
clu_6404_NA	scaffold7309:2302056-2316613	0.436841	0.000629619	0	0	0.890978	0.745423	0.391421	g39679
clu_6404_NA	scaffold7309:2302056-2313287	0.370733	0.000629619	0	0	0.000211359	0.0937056	0.373624	g39679
clu_9057_NA	scaffold11064-2:714957-733559	0.545333	0.000637459	0	0	0	0.0217571	0.567091
clu_9057_NA	scaffold11064-2:729536-733559	0.528665	0.000637459	0	0	0	0.948343	0.419678
clu_8556_NA	scaffold2589:512150-514215	0.343785	0.000644961	0.121886	0.469109	0	0.289553	0	g10416
clu_8556_NA	scaffold2589:512150-514248	0.343785	0.000644961	0.878188	0.534403	0	0.721572	0	g10416
clu_1230_NA	scaffold46-16:7077505-7126219	0.397315	0.00068108	0	0	0	0.351332	0.748648	g27252
clu_1230_NA	scaffold46-16:7077505-7088100	0.276195	0.00068108	0	0	0	0.342659	0.0664641	g27252
clu_6619_NA	scaffold5017:2388767-2389528	0.230291	0.000692102	0	0.238543	0.186901	0.410647	0	g22592
clu_9561_NA	scaffold131782:1549057-1550771	0.380505	0.000692969	0.628572	0.30477	0.297963	0.244927	0.334253
clu_9561_NA	scaffold131782:1549057-1554999	0.380505	0.000692969	0.384049	0.697991	0.704013	0.759501	0.666562
clu_4636_NA	scaffold4341:1954253-1967234	0.246486	0.000693267	0	0.25236	0.203426	0.333507	0.441013	g20638
clu_12142_NA	scaffold2999:160173-177529	0.419586	0.000700506	0	0.732706	0.31312	0.505624	0.355436
clu_12142_NA	scaffold2999:80089-177529	0.419586	0.000700506	0	0.279189	0.690663	0.498877	0.647942
clu_11649_NA	scaffold278-1:4470284-4474451	0.368248	0.000709228	0	0.223572	0	0.591819	0	g25670
clu_11649_NA	scaffold278-1:4470284-4475085	0.368248	0.000709228	0	0.776428	0	0.408181	0	g25670
clu_191_NA	scaffold11789:71577-88387	0.277484	0.000724497	0	0	0	0.212934	0.490418	g12434
clu_5581_NA	scaffold1150-1:6850757-6862072	0.339391	0.000727451	0	0	0.993805	0	0.654414	g42836
clu_5581_NA	scaffold1150-1:6857419-6862072	0.339391	0.000727451	0	0	0.00619542	0	0.345586	g42836
clu_3557_NA	scaffold78-882:26828-51901	0.235283	0.000757678	0.0984192	0.181529	0.231068	0.289993	0.330634	g27527
clu_7122_NA	scaffold78-1452:486675-491867	0.334754	0.000774355	0.879223	0.688821	0.544957	0	0
clu_7122_NA	scaffold78-1452:486675-491900	0.334754	0.000774355	0.120968	0.311811	0.455721	0	0
clu_1232_NA	scaffold46-16:7355304-7367313	0.270768	0.000789878	0	0.788361	0.628786	0.516277	0.576904
clu_10208_NA	scaffold479-9:178853-185972	0.361269	0.000829577	0.641732	0.971555	0.983797	0.987041	0.896128	g28806
clu_2873_NA	scaffold9643:76742-81974	0.407089	0.000867263	0	0	0.0190878	0.00416417	0.411253	g1385
clu_2873_NA	scaffold9643:77493-81974	0.407089	0.000867263	0	0	0.980912	0.995836	0.591001	g1385
clu_4250_NA	scaffold3613-2:3471642-3479337	0.306416	0.00088537	0	0	0.882753	0.631865	0.569949	g16774	cellular nucleic acid-binding protein-like isoform X1
clu_4250_NA	scaffold3613-2:3471642-3479352	0.306416	0.00088537	0	0	0.123635	0.38779	0.43806	g16774	cellular nucleic acid-binding protein-like isoform X1
clu_6222_NA	scaffold1472-12:2174741-2179791	0.356966	0.000891351	0.545886	0.185419	0.277307	0.240114	0.207674	g41182
clu_6222_NA	scaffold1472-12:2179906-2180338	0.356966	0.000891351	0.473624	0.818902	0.712009	0.767773	0.764598	g41182
clu_2455_NA	scaffold8693:858652-875218	0.21601	0.000936424	0.725678	0.88779	0.940106	0	0
clu_3400_NA	scaffold1209-3:17366454-17369184	0.225677	0.000956425	0	0.340102	0.56578	0	0	g42401
clu_8577_NA	scaffold19-1:1406409-1422036	0.454757	0.000969666	0.546822	0.706592	0.375454	0.373162	0.176196
clu_8577_NA	scaffold19-1:1350315-1384325	0.446324	0.000969666	0.330986	0.224504	0.609482	0.608069	0.670976
clu_8229_NA	scaffold7942-2:970012-976558	0.40831	0.000985176	0.475953	0.836753	0.669524	0.904082	0
clu_8229_NA	scaffold7942-2:970012-976235	0.400832	0.000985176	0.524047	0.175641	0.334714	0.109135	0
clu_7087_NA	scaffold545-1:5044276-5053354	0.342142	0.000998007	0.420409	0.0955986	0.403637	0.437741	0	g29237
clu_7148_NA	scaffold2430-1:4108283-4117671	0.240624	0.000998007	0.394181	0.634805	0	0	0	g8376
clu_7148_NA	scaffold2430-1:4109120-4117671	0.225091	0.000998007	0.518927	0.293836	0	0	0	g8376
clu_7087_NA	scaffold545-1:5041079-5053354	0.220222	0.000998007	0.252767	0.385475	0.228235	0.200769	0	g29237
clu_5758_NA	scaffold281:9620648-9624870	0.612405	0.00100323	0.640041	0.100641	0.0276364	0	0	g25815	voltage-dependent anion-selective channel protein 2-like
clu_5758_NA	scaffold281:9620553-9624870	0.352839	0.00100323	0.128356	0.586411	0.447381	0	0	g25815	voltage-dependent anion-selective channel protein 2-like
clu_5758_NA	scaffold281:9620883-9624870	0.204763	0.00100323	0.125485	0.359604	0.41223	0	0	g25815	voltage-dependent anion-selective channel protein 2-like
clu_843_NA	scaffold6239-16:94676-106657	0.387032	0.00100414	0	0.787063	0.634521	0.39649	0.591443
clu_2872_NA	scaffold9643:75140-76690	0.422212	0.00101374	0	0	0.0387985	0.0132995	0.43512	g1385
clu_2872_NA	scaffold9643:75140-77438	0.422212	0.00101374	0	0	0.961967	0.987092	0.565266	g1385
clu_10644_NA	scaffold8777-1:11835944-11853576	0.39429	0.00103273	0.383871	0.497652	0.126397	0.10307	0
clu_10644_NA	scaffold8777-1:11835944-11841958	0.260047	0.00103273	0.543339	0.39929	0.659771	0.67448	0
clu_3435_NA	scaffold5068-1:7312229-7316569	0.226008	0.00105354	0	0.999995	0.999998	0.774011	0	g22887
clu_10817_NA	scaffold7522-1:180785-183658	0.385308	0.00106259	0.469177	0.122646	0.0838695	0	0	g39099
clu_10817_NA	scaffold7522-1:180790-183658	0.323904	0.00106259	0.416867	0.74077	0.698147	0	0	g39099
clu_5083_NA	scaffold16850:417648-420839	0.248401	0.00107208	0	0	0.471465	0.719866	0	g32952
clu_5083_NA	scaffold16850:417648-428493	0.248401	0.00107208	0	0	0.528535	0.280134	0	g32952
clu_2561_NA	scaffold173127:112-1025	0.219698	0.00111149	0.721242	0.795559	0.697453	0.747109	0.888433
clu_3862_NA	scaffold9865:134073-134551	0.238635	0.00111593	0	0.120372	0.143769	0.0797884	0.31655	g2
clu_3862_NA	scaffold9865:134073-135381	0.238635	0.00111593	0	0.880939	0.856231	0.922382	0.68345	g2
clu_6567_NA	scaffold10209-7:531551-532845	0.335846	0.00117066	0.27417	0.193727	0.343567	0.509903	0	g844
clu_6567_NA	scaffold10209-7:532928-533282	0.215403	0.00117066	0.518099	0.431914	0.387875	0.299672	0	g844
clu_1301_NA	scaffold3710:515475-554021	0.341699	0.00118682	0	0.0609634	0.394537	0.163888	0.103348	g13939
clu_1301_NA	scaffold3710:516091-554021	0.300781	0.00118682	0	0.617046	0.382062	0.647524	0.673182	g13939
clu_9949_NA	scaffold328:3235801-3239794	0.263063	0.00119128	0	0.049574	0.120271	0.312637	0	g26281,g26282
clu_47_NA	scaffold9678:531767-542051	0.371121	0.00120934	0	0.783756	0.580104	0.376834	0	g1561
clu_11344_NA	scaffold4903-3:5375017-5376701	0.326697	0.00122915	0	0.545733	0.628423	0.757041	0.447041	g22214,g22216
clu_11344_NA	scaffold4903-3:5375017-5419325	0.326697	0.00122915	0	0.454267	0.383174	0.242959	0.569656	g22214,g22216
clu_650_NA	scaffold8579:190485-199222	0.243169	0.00122945	0	0.81857	0.795931	0.691328	0.572801
clu_650_NA	scaffold8579:190485-199246	0.243169	0.00122945	0	0.18403	0.206499	0.309557	0.438856
clu_3440_NA	scaffold5068-1:7437216-7442109	0.20711	0.00132793	0	0.312078	0.128595	0.180857	0	g22894
clu_11479_NA	scaffold2488-1:10485023-10495166	0.241487	0.00134618	0	0	0	0.662719	0.904206	g9946
clu_3398_NA	scaffold1209-3:17337626-17338679	0.203779	0.00137951	0	0.468979	0	0.2652	0	g42400
clu_5854_NA	scaffold11095:41588-49536	0.239944	0.00148316	0	0.667007	0.767091	0.701601	0.526834	g10816,g10817
clu_5854_NA	scaffold11095:41588-49545	0.239944	0.00148316	0	0.334625	0.233222	0.298399	0.473294	g10816,g10817
clu_1499_NA	scaffold3435-7:2828902-2830072	0.283579	0.00148366	0.560425	0.725924	0.773341	0.489709	0.645771	g15573	aminolevulinate synthase
clu_1499_NA	scaffold3435-7:2828902-2837938	0.283579	0.00148366	0.441832	0.275273	0.226712	0.527839	0.354229	g15573	aminolevulinate synthase
clu_5865_NA	scaffold7478:233228-233384	0.229477	0.00148366	0.336033	0.528544	0.56551	0	0	g40022
clu_7547_NA	scaffold331:1260-3865	0.206676	0.00149274	0.0411939	0	0	0.138836	0.251376	g26304
clu_7547_NA	scaffold331:1260-4049	0.206676	0.00149274	0.959216	0	0	0.866675	0.752131	g26304
clu_4982_NA	scaffold14381-32:127823-166184	0.365741	0.00149383	0	0	0	0.0704566	0.436198	g35277
clu_4982_NA	scaffold14381-32:127823-151729	0.288373	0.00149383	0	0	0	0.732859	0.444486	g35277
clu_3982_NA	scaffold12983:4224369-4228973	0.37093	0.00155141	0	0.101754	0.131734	0	0.472904	g28444
clu_3982_NA	scaffold12983:4225137-4228973	0.31996	0.00155141	0	0.339059	0.402816	0	0.106676	g28444
clu_1715_NA	scaffold1502:7913519-7914648	0.229331	0.00155146	0.742468	0.51514	0.537096	0.542771	0.599659	g41415
clu_4300_NA	scaffold1235:2876351-2879855	0.305713	0.00157253	0	0.615444	0.646475	0.539518	0.346315	g42625
clu_12116_NA	scaffold3443:445514-450399	0.324863	0.00157791	0	0	0.936644	0.611708	0.853806	g15602
clu_12116_NA	scaffold3443:445768-450399	0.324863	0.00157791	0	0	0.0638404	0.388703	0.147369	g15602
clu_8144_NA	scaffold3305-5:698485-728154	0.333388	0.00161536	0	0	0	0.086372	0.41976	g16131
clu_8144_NA	scaffold3305-5:698485-748422	0.333388	0.00161536	0	0	0	0.913628	0.58024	g16131
clu_4878_NA	scaffold168551:19476-25894	0.28107	0.00165592	0.688994	0.406729	0.503109	0.529425	0
clu_4878_NA	scaffold168551:19476-31155	0.217956	0.00165592	0.125974	0.34393	0.325019	0.337882	0
clu_6210_NA	scaffold89256-20:846794-856586	0.433966	0.00167696	0	0.166582	0.0416881	0.481938	0	g49008
clu_6210_NA	scaffold89256-20:846794-877180	0.40982	0.00167696	0	0.777797	0.946394	0.495167	0	g49008
clu_10850_NA	scaffold868:40244-42712	0.212907	0.00190328	0	0.291318	0.11101	0.0809592	0.0811412	g44181
clu_3820_NA	scaffold7065-1:934350-1001003	0.295659	0.00193945	0	0.362378	0.490992	0.51701	0.274536	g40167,g40166
clu_3820_NA	scaffold7065-1:934350-968915	0.276063	0.00193945	0	0.0905447	0.100928	0.192197	0.366745	g40167,g40166
clu_9607_NA	scaffold10306:668117-669848	0.348509	0.0019914	0.824709	0.908638	0.849137	0.77844	0.54181	g1074
clu_9607_NA	scaffold10306:668117-669348	0.203889	0.0019914	0.126152	0.0643031	0.0946627	0.152003	0.292474	g1074
clu_12174_NA	scaffold10807:73961-88578	0.227434	0.00202902	0	0.23655	0.456419	0.264947	0.465545	g5715
clu_8611_NA	scaffold13236-4:1435237-1442260	0.211892	0.00203909	0	0.37385	0.497368	0.583145	0	g14983
clu_8611_NA	scaffold13236-4:1440339-1442260	0.211892	0.00203909	0	0.631271	0.502997	0.419379	0	g14983
clu_7682_NA	scaffold3051:2458331-2462613	0.290189	0.00204373	0	0.0803472	0.028739	0	0.316704	g18470
clu_7682_NA	scaffold3051:2460595-2462613	0.224711	0.00204373	0	0.540431	0.52221	0	0.30262	g18470
clu_5749_NA	scaffold281:6686699-6693149	0.233611	0.00207877	0	0.65499	0.538829	0.420792	0.558256
clu_5749_NA	scaffold281:6686699-6693211	0.233611	0.00207877	0	0.345809	0.465259	0.582993	0.451706
clu_3544_NA	scaffold7827-3:11595082-11610611	0.460035	0.0020955	0.260461	0.690323	0.43449	0.470294	0.720316	g36368	nipsnap, isoform F
clu_3544_NA	scaffold7827-3:11595082-11601073	0.247156	0.0020955	0.426139	0.185237	0.432728	0.333175	0.197742	g36368	nipsnap, isoform F
clu_3544_NA	scaffold7827-3:11601261-11610611	0.217774	0.0020955	0.340649	0.142116	0.192667	0.237819	0.109193	g36368	nipsnap, isoform F
clu_11451_NA	scaffold3538:1856106-1952660	0.275287	0.00220328	0	0	0	0.339646	0.614933	g16519
clu_11451_NA	scaffold3538:1902870-1952660	0.275287	0.00220328	0	0	0	0.660354	0.385067	g16519
clu_9082_NA	scaffold5691:1299816-1299932	0.231951	0.00220695	0	0	0	0.596216	0.364265
clu_10910_NA	scaffold244:1138973-1150939	0.271669	0.00220845	0.895137	0.656411	0.911171	0.93859	0	g25259
clu_10094_NA	scaffold2992:4096079-4105329	0.249785	0.00222129	0	0.299047	0.121144	0.034536	0.0330321	g19095
clu_10094_NA	scaffold2992:4096749-4105329	0.213746	0.00222129	0	0.522123	0.730835	0.738065	0.671355	g19095
clu_9003_NA	scaffold2052:36414-37029	0.294911	0.00227354	0.682762	0.702904	0.636101	0.921396	0
clu_9003_NA	scaffold2052:36508-37123	0.256223	0.00227354	0.185961	0.256375	0.316452	0.0786041	0
clu_9205_NA	scaffold870:2746914-2749066	0.314211	0.00229296	6.14e-14	0	0	0	0.314211	g44203
clu_9205_NA	scaffold870:2746914-2758104	0.314211	0.00229296	1	0	0	0	0.685789	g44203
clu_12124_NA	scaffold141775:1604-5840	0.245935	0.00229879	0.701659	0.595289	0	0.455723	0
clu_12124_NA	scaffold141775:285-5840	0.245935	0.00229879	0.300415	0.409817	0	0.556173	0
clu_2261_NA	scaffold19240-2:76157-79571	0.261323	0.00240667	0	0.667227	0.832177	0.899587	0.942117	g33347,g33346
clu_8575_NA	scaffold19-1:1391996-1393711	0.459756	0.00242975	0.211904	0.471243	0.684668	0.645441	0	g26591,g26592	adenosine deaminase-like
clu_8575_NA	scaffold19-1:1335860-1337724	0.411478	0.00242975	0.593178	0.394681	0.216431	0.191701	0	g26591,g26592	adenosine deaminase-like
clu_981_NA	scaffold5387:2877042-2884849	0.320401	0.0025905	0.679599	1	0.985363	0	0	g23786,g23785
clu_981_NA	scaffold5387:2877042-2894703	0.320401	0.0025905	0.320424	1.11e-20	0.0146375	0	0	g23786,g23785
clu_7508_NA	scaffold26169:2193713-2236435	0.443107	0.00267134	0.310047	0.550216	0.730693	0.4252	0
clu_7508_NA	scaffold26169:2193713-2236439	0.390732	0.00267134	0.628206	0.447855	0.277312	0.582904	0
clu_2326_NA	scaffold9723-1:7101872-7117444	0.289365	0.00281668	0.316605	0.0122654	0.02724	0	0	g1732
clu_2326_NA	scaffold9723-1:7101872-7114862	0.259872	0.00281668	0.346265	0.584841	0.547526	0	0	g1732
clu_8281_NA	scaffold366-1:4730097-4738751	0.314447	0.00281799	0	0	0	0.640313	0.954759	g28620
clu_5020_NA	scaffold6377-1:3022293-3026482	0.453978	0.00282454	0	0	0	0.350849	0.804827	g38195	tropomyosin 1, isoform E
clu_6246_NA	scaffold2345-2:545555-547580	0.20638	0.00300552	0	0.54298	0.526382	0.522436	0.346481	g9732
clu_7999_NA	scaffold3362-3:3094527-3094662	0.233766	0.00300685	0	0	0	0.377263	0.611029	g16313,g16316,g16314,g16317
clu_5368_NA	scaffold1198-20:876816-895720	0.228352	0.00301426	0.751141	0.979005	0.882424	0.864335	0	g42239	sidekick, isoform H
clu_11836_NA	scaffold4251-26:155-5989	0.261508	0.00305414	0	0.29684	0.516069	0.559408	0.541836	g13590
clu_11836_NA	scaffold4251-26:1263-5989	0.222467	0.00305414	0	0.567933	0.390319	0.348668	0.371818	g13590
clu_1405_NA	scaffold115075:568983-590343	0.294334	0.00306216	0	0.186043	0.374339	0.0842567	0.12685	g48668
clu_1405_NA	scaffold115075:584202-590343	0.258541	0.00306216	0	0.474015	0.366039	0.624687	0.614706	g48668
clu_8028_NA	scaffold757:3037438-3044681	0.214141	0.00306376	0	0.59638	0.707227	0.531779	0.493059	g44595
clu_5291_NA	scaffold1906:805592-806796	0.250765	0.00307617	0.0821389	0.334477	0.250693	0.298186	0	g6951
clu_7723_NA	scaffold3051:8914021-8914194	0.26071	0.00311544	0.58428	0.644499	0.759488	0.82654	0.770582	g18569
clu_7723_NA	scaffold3051:8914036-8914194	0.26071	0.00311544	0.435264	0.368722	0.247132	0.176687	0.256152	g18569
clu_6991_NA	scaffold2247:1163519-1179765	0.21057	0.00315322	0	0	0	0.595792	0.385222	g6619
clu_369_NA	scaffold2266-1:11670166-11674113	0.201898	0.003167	0.808135	0	0.606238	0	0	g8856
clu_12173_NA	scaffold10807:66867-73757	0.210875	0.00317004	0	0	0	0.898447	0.687572	g5715
clu_10571_NA	scaffold2288-75:821159-825023	0.388322	0.00317441	0	0	0.848881	0.539675	0.445983	g9383
clu_10571_NA	scaffold2288-75:821934-825023	0.37831	0.00317441	0	0	0.0940869	0.43781	0.47397	g9383
clu_7157_NA	scaffold8347-11:6109926-6123867	0.255552	0.0034067	0	0.151659	0.111331	0.364627	0.300187
clu_7157_NA	scaffold8347-11:6109926-6123703	0.205142	0.0034067	0	0.585197	0.708197	0.561699	0.563923
clu_1910_NA	scaffold4510-6:2587709-2591567	0.263801	0.00350101	0	0	0	0.353426	0.0896252	g21774	LOW QUALITY PROTEIN: PDZ and LIM domain protein Zasp-like
clu_11820_NA	scaffold8371:83932-101742	0.212487	0.00350502	0.509145	0.623435	0.705109	0.697207	0.722851	g3891
clu_10032_NA	scaffold1000552:1580-6215	0.364562	0.00353426	0.16998	0.538964	0.415423	0	0
clu_10032_NA	scaffold1000552:1580-6692	0.339237	0.00353426	0.801037	0.441803	0.574395	0	0
clu_9413_NA	scaffold8331:838631-842393	0.490953	0.00353624	0	0.672902	0.286971	0	0.148506
clu_9413_NA	scaffold8331:838631-842504	0.381101	0.00353624	0	0.0828674	0.223813	0	0.504082
clu_9413_NA	scaffold8331:838631-842498	0.308361	0.00353624	0	0.137385	0.468197	0	0.270647
clu_8069_NA	scaffold3373-2:846309-851151	0.247458	0.00354665	0	0.903291	0.94166	0.772084	0.693173	g15341
clu_8069_NA	scaffold3373-2:846309-851172	0.247458	0.00354665	0	0.110253	0.0601083	0.231994	0.311444	g15341
clu_11660_NA	scaffold278-1:5195972-5198988	0.516227	0.00355343	0.562215	0.0486471	0.0978891	0.0961051	0	g25680,g25681	protein abrupt-like, POU domain, class 4, transcription factor 2-like
clu_4008_NA	scaffold3507-1:2862683-2863464	0.283574	0.00357828	0	4.32e-09	2.58e-07	0.116065	0.304178	g16346
clu_4008_NA	scaffold3507-1:2862961-2863464	0.283574	0.00357828	0	1	1	0.886851	0.716435	g16346
clu_3107_NA	scaffold55-2:3678223-3686664	0.239948	0.00359216	0	0.874645	0.871007	0.636702	0	g27321,g27322
clu_3107_NA	scaffold55-2:3680783-3686664	0.239948	0.00359216	0	0.126032	0.132673	0.365303	0	g27321,g27322
clu_11742_NA	scaffold4204-74:556247-560089	0.270515	0.00361659	0	0.25168	0.339493	0.522195	0	g13501
clu_11742_NA	scaffold4204-74:556247-560161	0.261356	0.00361659	0	0.722982	0.660507	0.481582	0	g13501
clu_2762_NA	scaffold1739:7402761-7407452	0.235384	0.00362909	0	0.697758	0.933142	0	0	g46061
clu_2762_NA	scaffold1739:7402761-7408560	0.235384	0.00362909	0	0.302242	0.0668576	0	0	g46061
clu_1014_NA	scaffold7505:1000830-1022461	0.211012	0.00367849	0.988136	0.778027	0.877138	0.892563	0.985299
clu_1014_NA	scaffold7505:1000830-1045468	0.211012	0.00367849	0.0123497	0.230507	0.151579	0.139857	0.0174931
clu_3162_NA	scaffold3527-1:56701-57125	0.206148	0.00369098	0.391993	0.598429	0.560223	0.509144	0.410042	g16458
clu_3162_NA	scaffold3527-1:56701-57137	0.206148	0.00369098	0.613774	0.40442	0.441082	0.491187	0.591025	g16458
clu_11990_NA	scaffold59541-5:3372711-3374076	0.252079	0.00379032	0	0.366949	0.340273	0.592769	0.492723	g30927
clu_4330_NA	scaffold2683:629223-640303	0.27104	0.0037949	0.434037	0.556395	0.705404	0.643818	0	g10665
clu_4330_NA	scaffold2683:630057-640303	0.260126	0.0037949	0.532427	0.396883	0.271424	0.337514	0	g10665
clu_9826_NA	scaffold756-9:5555251-5561683	0.398731	0.00384412	0	0	0.886107	0.625334	0.489237	g44554
clu_9826_NA	scaffold756-9:5555260-5561683	0.398731	0.00384412	0	0	0.122455	0.39884	0.521186	g44554
clu_3589_NA	scaffold787-3:639703-641761	0.28046	0.00388804	0	0	0.734143	0	0.453683	g43981	chitin deacetylase-like 5, isoform B
clu_3589_NA	scaffold787-3:639703-642291	0.28046	0.00388804	0	0	0.265857	0	0.546317	g43981	chitin deacetylase-like 5, isoform B
clu_8199_NA	scaffold1258-6:212471-212792	0.234416	0.00398908	0	0.369284	0.446464	0.604009	0	g41672
clu_8520_NA	scaffold2392:1500887-1516010	0.234624	0.00399371	0	0.151225	0.102899	0.338669	0.253155	g8013
clu_8520_NA	scaffold2392:1501013-1516010	0.234624	0.00399371	0	0.849262	0.900306	0.665682	0.7507	g8013
clu_4409_NA	scaffold6331-2:2718209-2754507	0.247594	0.00401773	0.214818	0.0932533	0.274878	0.341434	0.362796	g37908
clu_68_NA	scaffold3321:780505-783642	0.376768	0.00412143	0	0.65223	0.312464	0.691617	0	g16218
clu_68_NA	scaffold3321:783481-783642	0.352566	0.00412143	0	0.357848	0.645593	0.308383	0	g16218
clu_10730_NA	scaffold5360-1:4051769-4056725	0.285378	0.00418028	0	0	0.0867749	0.372153	0	g23415
clu_10730_NA	scaffold5360-1:4051821-4056725	0.285378	0.00418028	0	0	0.913225	0.627847	0	g23415
clu_9984_NA	scaffold7830:3591692-3593652	0.285647	0.00427748	0	0.474199	0.174265	0	0.20367	g36423
clu_9984_NA	scaffold7830:3593789-3594278	0.285647	0.00427748	0	0.540088	0.832607	0	0.768328	g36423
clu_7081_NA	scaffold545-1:2309137-2318309	0.370242	0.00428142	0	0.166751	0.19796	0.216081	0.479228	g29226,g29227
clu_7081_NA	scaffold545-1:2309137-2318304	0.327392	0.00428142	0	0.748766	0.803157	0.757348	0.561534	g29226,g29227
clu_11147_NA	scaffold1612:2350475-2358743	0.387083	0.00429759	0	0.705096	0.318013	0	0	g41534
clu_11147_NA	scaffold1612:2350475-2354072	0.364089	0.00429759	0	0.213159	0.577248	0	0	g41534
clu_6971_NA	scaffold10125:483129-502513	0.372945	0.00443407	0.837997	0.465052	0	0	0	g739
clu_6971_NA	scaffold10125:483129-519445	0.372945	0.00443407	0.162003	0.534948	0	0	0	g739
clu_9942_NA	scaffold328:985602-1044765	0.316287	0.00447607	0.54895	0	0	0.232663	0	g26255,g26256
clu_9942_NA	scaffold328:1023934-1024228	0.241609	0.00447607	0.037289	0	0	0.278898	0	g26255,g26256
clu_5654_NA	scaffold16145-2:21602-23699	0.204938	0.00449155	0	0.322933	0.426105	0.527845	0	g35085
clu_3959_NA	scaffold100-20:7793932-7794670	0.248407	0.00464427	0.378023	0.262026	0.229494	0.123652	0.209874	g24507
clu_3959_NA	scaffold100-20:7793932-7794941	0.248407	0.00464427	0.62799	0.741983	0.780745	0.877427	0.801124	g24507
clu_8403_NA	scaffold1143:930439-931237	0.298361	0.00465974	0.94851	0.772715	0.79843	0.644323	0	g43852
clu_8403_NA	scaffold1143:930418-931237	0.226679	0.00465974	0.0227321	0.130066	0.162685	0.256417	0	g43852
clu_5021_NA	scaffold6377-1:3026646-3031047	0.40299	0.00484238	0	0	0	0.760893	0.357903	g38195	tropomyosin 1, isoform E
clu_5021_NA	scaffold6377-1:3026646-3039359	0.40299	0.00484238	0	0	0	0.239107	0.642097	g38195	tropomyosin 1, isoform E
clu_8576_NA	scaffold19-1:1395297-1397094	0.469103	0.00512826	0.486803	0.701699	0.871808	0.952656	0	g26591,g26592	adenosine deaminase-like
clu_8576_NA	scaffold19-1:1339265-1397094	0.240012	0.00512826	0.251349	0.227319	0.0827117	0.0117524	0	g26591,g26592	adenosine deaminase-like
clu_8576_NA	scaffold19-1:1339265-1340976	0.229091	0.00512826	0.288796	0.0809625	0.0556505	0.0360074	0	g26591,g26592	adenosine deaminase-like
clu_4888_NA	scaffold174304:2347-2442	0.338292	0.00534318	0	0.530687	0.433688	0.363662	0.192258
clu_4888_NA	scaffold174304:2378-2442	0.338292	0.00534318	0	0.470084	0.57563	0.648616	0.809912
clu_7947_NA	scaffold18551:1941633-1946802	0.320838	0.00534703	0.27518	0.30671	0.565847	0.462131	0.581215
clu_4666_NA	scaffold3454-1:3735969-3747001	0.26083	0.00541373	0	0.616825	0.589118	0.502085	0	g16882
clu_4634_NA	scaffold2265:155160-167280	0.238675	0.00542489	0.673916	0.542848	0.514423	0.426622	0
clu_4634_NA	scaffold2265:155160-167299	0.238675	0.00542489	0.350733	0.457307	0.488923	0.576858	0
clu_4249_NA	scaffold3613-2:3457823-3471464	0.558109	0.0055218	0	0.899383	0.358771	0.714287	0.643669	g16774	cellular nucleic acid-binding protein-like isoform X1
clu_4249_NA	scaffold3613-2:3457659-3471464	0.327238	0.0055218	0	0.0313772	0.350879	0.23118	0.286126	g16774	cellular nucleic acid-binding protein-like isoform X1
clu_12098_NA	scaffold5851:529259-531967	0.21938	0.00577596	0.495906	0.425559	0.276243	0	0	g19802
clu_11181_NA	scaffold3417:2166223-2222570	0.253053	0.00581578	0.857896	0.843964	0.824463	0.698482	0.768654
clu_532_NA	scaffold6941:95175-110896	0.275263	0.0059545	0	0.803417	0	0.834691	0.560603	g40746
clu_9332_NA	scaffold12066-2:724276-728644	0.234485	0.00598363	0	0	0	0.335602	0.570087	g29745
clu_9332_NA	scaffold12066-2:724276-737117	0.234485	0.00598363	0	0	0	0.664398	0.429913	g29745
clu_3763_NA	scaffold2256-1:1194262-1203447	0.201718	0.00608147	0	0.704849	0.881493	0.901849	0
clu_3763_NA	scaffold2256-1:1194286-1203447	0.201718	0.00608147	0	0.299868	0.121353	0.0984473	0
clu_5133_NA	scaffold3611-15:163771-185287	0.293942	0.00639214	0	0.177715	0.387438	0.469027	0
clu_5133_NA	scaffold3611-15:179095-185287	0.272975	0.00639214	0	0.766075	0.613121	0.536361	0
clu_2573_NA	scaffold606819:12048-13847	0.224336	0.00646605	0.405272	0.352425	0.325225	0.181896	0
clu_2573_NA	scaffold606819:12048-13918	0.224336	0.00646605	0.598495	0.655218	0.675339	0.820117	0
clu_8469_NA	scaffold226:209274-221062	0.218162	0.00648097	0	0	0.48253	0.264368	0	g25039
clu_8469_NA	scaffold226:209274-221981	0.216725	0.00648097	0	0	0.191224	0.407949	0	g25039
clu_6845_NA	scaffold40789:795397-813518	0.254342	0.00661166	0.642781	0	0	0.896151	0.852553	g32164
clu_6741_NA	scaffold59886:3340470-3350274	0.351798	0.00677949	0	0.0185694	0	0.304798	0.378456	g30987
clu_6741_NA	scaffold59886:3340889-3350274	0.251462	0.00677949	0	0.487119	0	0.238795	0.288533	g30987
clu_7132_NA	scaffold78-1452:4166348-4186519	0.373797	0.00689557	0.731758	0	0	0.712267	0.361607	g27709
clu_7132_NA	scaffold78-1452:4182759-4186519	0.218576	0.00689557	0.130912	0	0	0.150003	0.34941	g27709
clu_6247_NA	scaffold2345-2:548818-554562	0.244511	0.00698845	0	0.444184	0.337707	0.265296	0.21282	g9732
clu_6247_NA	scaffold2345-2:548818-556735	0.244511	0.00698845	0	0.561279	0.677407	0.749479	0.800327	g9732
clu_7747_NA	scaffold3478:552693-563899	0.297046	0.00713311	0	0.443059	0.378002	0.246574	0.146013
clu_7747_NA	scaffold3478:552790-563899	0.297046	0.00713311	0	0.556941	0.621998	0.753426	0.854341
clu_10855_NA	scaffold711658:5816-7361	0.384605	0.0071814	0.900005	0	0	0	0.515401
clu_10855_NA	scaffold711658:7078-7361	0.384605	0.0071814	0.0999945	0	0	0	0.484599
clu_3779_NA	scaffold2417-1:142150-158186	0.341667	0.00772224	0.944487	0.612187	0.952423	0	0	g8212
clu_3779_NA	scaffold2417-1:144303-158186	0.341667	0.00772224	0.0596582	0.401325	0.0494044	0	0	g8212
clu_8244_NA	scaffold7942-2:2348696-2353829	0.279634	0.0081491	0	0	0	0.271409	0.551043	g36716
clu_8244_NA	scaffold7942-2:2348696-2356812	0.245206	0.0081491	0	0	0	0.431038	0.185832	g36716
clu_5082_NA	scaffold16850:402406-409809	0.265914	0.00845399	0	0.147016	0	0.41293	0	g32951
clu_12137_NA	scaffold5502:1517115-1519801	0.214916	0.00846772	0	0.589924	0.481463	0.380026	0	g23991
clu_12137_NA	scaffold5502:1517115-1519813	0.214916	0.00846772	0	0.412831	0.519242	0.627747	0	g23991
clu_10301_NA	scaffold9867:6734917-6794610	0.263794	0.008547	0.808013	0.544219	0	0	0
clu_10301_NA	scaffold9867:6794696-6794880	0.251576	0.008547	0.17571	0.427286	0	0	0
clu_784_NA	scaffold12149:229622-229964	0.205038	0.00857536	0.492556	0.618081	0.390436	0	0	g29936
clu_7950_NA	scaffold18551:1969409-1989580	0.223393	0.00863311	0.572382	0.34899	0	0	0
clu_11926_NA	scaffold1818-1:3667746-3674410	0.355758	0.00875881	0	0.400025	0.755783	0	0	g45842
clu_11926_NA	scaffold1818-1:3667746-3668424	0.247669	0.00875881	0	0.484885	0.237217	0	0	g45842
clu_7291_NA	scaffold937-1:1685952-1718179	0.346615	0.00901883	0.434691	0.274053	0.373918	0.454797	0.171879
clu_7291_NA	scaffold937-1:1685952-1687173	0.27761	0.00901883	8.3e-05	0.104518	0.0429775	0.217398	0.288266
clu_7291_NA	scaffold937-1:1685952-1719446	0.208464	0.00901883	0.449362	0.332396	0.405973	0.248682	0.392074
clu_4615_NA	scaffold4510-1:295282-305456	0.235215	0.00912498	0	0.638502	0.731693	0.497173	0	g21757
clu_1155_NA	scaffold2344:1379911-1387701	0.210414	0.00984596	0	0.336637	0.396475	0.544214	0	g9717
clu_1155_NA	scaffold2344:1382088-1387701	0.210414	0.00984596	0	0.667876	0.603609	0.457462	0	g9717
clu_5466_NA	scaffold5618:866213-874551	0.245227	0.00987583	0	0	0.387948	0	0.142721	g24125
clu_4203_NA	scaffold3746:8180377-8181587	0.264692	0.00989232	0.884593	0	0	0.619901	0	g14188
clu_4203_NA	scaffold3746:8180825-8181587	0.264692	0.00989232	0.115407	0	0	0.380099	0	g14188
clu_4438_NA	scaffold5622-1:1383919-1386722	0.241156	0.00989592	0	0.654056	0.580196	0.418487	0	g24151
clu_4438_NA	scaffold5622-1:1383919-1386728	0.241156	0.00989592	0	0.351193	0.421781	0.587099	0	g24151
clu_4869_NA	scaffold1145-4:9783458-9789238	0.285219	0.0101817	0.695434	0.980653	0	0	0	g42726
clu_4869_NA	scaffold1145-4:9783458-9789505	0.285219	0.0101817	0.304566	0.0193469	0	0	0	g42726
clu_4672_NA	scaffold3454-1:6368771-6376126	0.212918	0.0102496	0	0	0.320039	0.537666	0.514612	g16903
clu_4672_NA	scaffold3454-1:6368771-6375889	0.204138	0.0102496	0	0	0.659774	0.462334	0.487033	g16903
clu_5204_NA	scaffold71461:2864001-2874823	0.248881	0.0103419	0	0.295998	0.285941	0.497051	0.54096	g50136
clu_7569_NA	scaffold8364:1564696-1568051	0.348354	0.0104848	0.592834	0.302261	0.25103	0.255959	0.289092
clu_7569_NA	scaffold8364:1564696-1568270	0.348354	0.0104848	0.412736	0.709077	0.755668	0.746035	0.715619
clu_12109_NA	scaffold97361:7682-11065	0.219183	0.0105677	0	0.172467	0.0933936	0.182272	0.312577	g49322
clu_6094_NA	scaffold12422-14:1253068-1258392	0.242789	0.0107084	0	0.325187	0.365911	0.121392	0	g27959
clu_6094_NA	scaffold12422-14:1255290-1258392	0.236484	0.0107084	0	0.634692	0.535502	0.771987	0	g27959
clu_6740_NA	scaffold59886:3339177-3340338	0.227993	0.0107409	6.36e-06	6.41e-08	1.18e-07	0.228	0	g30987
clu_7786_NA	scaffold5808-38:1433658-1436368	0.274155	0.0112352	0	0	0	0.650023	0.375867	g19672
clu_7786_NA	scaffold5808-38:1433798-1436368	0.274155	0.0112352	0	0	0	0.349977	0.624133	g19672
clu_7044_NA	scaffold50865-1:5337790-5345503	0.294529	0.011349	0.459739	0	0.166621	0	0.33751	g30292
clu_7044_NA	scaffold50865-1:5337790-5359313	0.294529	0.011349	0.543556	0	0.838085	0	0.664561	g30292
clu_932_NA	scaffold6239-16:10098924-10105994	0.508032	0.0114347	0	0.533159	0	0.0251273	0
clu_932_NA	scaffold6239-16:10098924-10105997	0.508032	0.0114347	0	0.466841	0	0.974873	0
clu_10607_NA	scaffold6462-2:3131805-3149057	0.263213	0.0114989	3.1e-05	0	0	0.263244	0
clu_1918_NA	scaffold9230-4:172080-178629	0.457045	0.0115073	0.0793006	0	0	0	0.536346
clu_6538_NA	scaffold4251-25:15657-21179	0.213955	0.0116129	0.304603	0.493405	0.414475	0.393017	0.437761
clu_7582_NA	scaffold9674:1257285-1275844	0.212952	0.0117054	0	0	0	0.0752525	0.288204	g1506
clu_11579_NA	scaffold6803-23:3465309-3465873	0.371352	0.0119751	0	0.0791794	0.0766504	0.444451	0.346118	g37452
clu_11579_NA	scaffold6803-23:3465309-3466151	0.371352	0.0119751	0	0.934162	0.933143	0.562208	0.664811	g37452
clu_853_NA	scaffold6239-16:1468770-1469381	0.237228	0.01278	0	0.646276	0.599882	0.411071	0	g38805
clu_3588_NA	scaffold787-3:641986-643929	0.28802	0.0129195	0	0	0.677881	0	0.389861	g43981	chitin deacetylase-like 5, isoform B
clu_3588_NA	scaffold787-3:642516-643929	0.28802	0.0129195	0	0	0.322119	0	0.610139	g43981	chitin deacetylase-like 5, isoform B
clu_1897_NA	scaffold50174-1:1747511-1751638	0.587508	0.01335	0.959043	0.49346	0.720696	0.390127	0.73043
clu_1897_NA	scaffold50174-1:1751429-1751638	0.587508	0.01335	0.0420554	0.526763	0.309164	0.629563	0.339085
clu_9020_NA	scaffold6157:3435791-3442861	0.210136	0.0135598	0	0.77763	0	0	0.987766	g38595
clu_5622_NA	scaffold231:1757782-1758231	0.375998	0.0139767	0	0	0	0.697388	0.321389	g25134
clu_5622_NA	scaffold231:1756599-1758231	0.368495	0.0139767	0	0	0	0.0312321	0.399727	g25134
clu_780_NA	scaffold384:899345-911513	0.347507	0.0147957	0	0.995159	0.999998	0.759671	0.896017
clu_780_NA	scaffold384:899345-901800	0.240327	0.0147957	0	0.00241911	1.93e-06	0.240329	0.0575201
clu_9446_NA	scaffold2366:2169774-2190115	0.433883	0.0152115	0	0.626544	0.965788	0.637518	0
clu_9446_NA	scaffold2366:2189619-2190115	0.433883	0.0152115	0	0.468095	0.0342121	0.309032	0
clu_9462_NA	scaffold2366:9660531-9661398	0.210239	0.0165795	0.686877	0.611814	0.557195	0.476638	0	g7797
clu_11582_NA	scaffold6803-23:3468577-3476954	0.204751	0.0179627	0	0.524991	0.580094	0.731686	0.650211	g37452
clu_5181_NA	scaffold2139:10084611-10097159	0.440699	0.0185643	0.538619	0.317025	0	0.10558	0	g6094
clu_5181_NA	scaffold2139:10097371-10099129	0.440699	0.0185643	0.461934	0.724058	0	0.902079	0	g6094
clu_1040_NA	scaffold1963:4541483-4561741	0.209641	0.0187049	0	0.0661079	0.275749	0	0	g7182
clu_8085_NA	scaffold12203:55977-63831	0.474977	0.0187759	0	0	0.896586	0.704396	0.415783	g29982	karst, isoform B
clu_8085_NA	scaffold12203:55977-63885	0.474977	0.0187759	0	0	0.10924	0.258229	0.610702	g29982	karst, isoform B
clu_12057_NA	scaffold2985-3:12420710-12465717	0.425269	0.0188647	0	0.181826	0.607994	0.503688	0	g19027,g19026
clu_12057_NA	scaffold2985-3:12457741-12465717	0.244197	0.0188647	0	0.29332	0.0551983	0.0421659	0	g19027,g19026
clu_426_NA	scaffold4502:3677701-3690124	0.241658	0.0193804	0	0.667532	0.719059	0.731496	0.479194	g21704
clu_10009_NA	scaffold12564-1:10199-10315	0.263947	0.0198271	0	0	0	0.0952153	0.359162	g28124,g28122
clu_10009_NA	scaffold12564-1:4604-4720	0.253978	0.0198271	0	0	0	0.87033	0.616352	g28124,g28122
clu_7260_NA	scaffold1363-12:45646-66815	0.379256	0.0198534	0.100231	0.479488	0	0	0
clu_7123_NA	scaffold78-1452:512439-527878	0.203607	0.0200217	0.585045	0.391998	0.466745	0.377533	0	g27688
clu_7123_NA	scaffold78-1452:512445-527878	0.203607	0.0200217	0.421022	0.612858	0.540689	0.624629	0	g27688
clu_4512_NA	scaffold6106:1781909-1792684	0.247121	0.0202862	0	0.366936	0.516565	0.320173	0
clu_11485_NA	scaffold34117:714865-716029	0.218449	0.0208678	0	0.490548	0.366519	0.272605	0	g31407
clu_5218_NA	scaffold1753:904640-946563	0.295519	0.0209887	0	0	0.390164	0.612025	0.681368
clu_5218_NA	scaffold1753:932803-946563	0.235089	0.0209887	0	0	0.512795	0.277437	0.308009
clu_4247_NA	scaffold3613-2:2617284-2638293	0.21501	0.0213241	0	0.171223	0.11703	0.299963	0.075082	g16765
clu_4247_NA	scaffold3613-2:2617494-2638293	0.21501	0.0213241	0	0.830013	0.850163	0.711004	0.924918	g16765
clu_6151_NA	scaffold361:31155-34176	0.275088	0.0218373	0	0	0	0.4957	0.220611	g28529
clu_5059_NA	scaffold8950:330559-393425	0.243175	0.0221407	0	0	0.384946	0.628121	0	g2786
clu_9709_NA	scaffold78-1426:10333194-10348541	0.257717	0.0225353	0.484905	0.313983	0	0.576029	0
clu_9709_NA	scaffold78-1426:10333194-10348532	0.257717	0.0225353	0.516818	0.692466	0	0.4283	0
clu_4148_NA	scaffold134712:4712-10865	0.253776	0.0231272	0.191798	0.155712	0	0.409489	0
clu_4148_NA	scaffold134712:4769-10865	0.253776	0.0231272	0.812198	0.846973	0	0.591133	0
clu_9944_NA	scaffold328:1720300-1723720	0.224821	0.0235588	0.234125	0.200436	0	0.425257	0
clu_810_NA	scaffold4913:4824126-4824663	0.215337	0.0238504	0.735882	0.791066	0.714334	0.571917	0.660116	g22257
clu_810_NA	scaffold4913:4824496-4824663	0.215337	0.0238504	0.293472	0.212747	0.311798	0.436453	0.369017	g22257
clu_2050_NA	scaffold2371-45:6452199-6452438	0.231862	0.0264942	0	0.707271	0.857882	0.920501	0.939617	g7880
clu_2050_NA	scaffold2371-45:6452199-6452397	0.231862	0.0264942	0	0.298475	0.147846	0.0807776	0.0611834	g7880
clu_6530_NA	scaffold11155-1:7006279-7007090	0.379195	0.0267506	0	0	0	0.426433	0.805628	g10990
[truncated: 57 more rows]
